# Supplementary material for: Redox deracemization of phosphonate-substituted dihydropyrimidines
Source: Royal Society of Chemistry journal article supplement (doi:10.1039/d1ob02079j), 2021-01-01

## Supporting Information

### Redox Deracemization of Phosphonate-Substituted Dihydropyrimidines

*Fan-Jie Meng, Bing-Ru Shao, Maria K. Velopolcek, Xuan Guo, Guang-Shou Feng\*  
and Lei Shi\**

*E-mail: [gf56@duke.edu](mailto:gf56@duke.edu)*

*Email: [shileichem@dlut.edu.cn](mailto:shileichem@dlut.edu.cn)*

#### Table of Contents

|                                                                           |        |
|---------------------------------------------------------------------------|--------|
| 1. General.....                                                           | S1     |
| 2. General Procedure for Synthesis of 3,4-Dihydropyrimidin-2-one.....     | S1     |
| 3. General Procedure for Redox Deracemization.....                        | S2-7   |
| 4. Determination of Absolute Configuration of Products.....               | S8-10  |
| 5. Control Experiments.....                                               | S11    |
| 6. Redox Deracemization of 3,4-Dihydropyrimidin-2-ones at Gram Scale..... | S12    |
| 7. Synthesis of the Optically Active Products 5m and 6m.....              | S13-15 |
| 8. References.....                                                        | S15    |
| 9. Copies of NMR and HPLC for the Compounds.....                          | S15-88 |

## 1. General

**General:** All reactions were carried out under an atmosphere of nitrogen using the standard Schlenk techniques, unless otherwise noted.  $^1\text{H}$  NMR and  $^{13}\text{C}$  NMR spectra were recorded at room temperature in  $\text{CDCl}_3$  on 400 MHz instrument with tetramethylsilane (TMS) as internal standard. Enantiomeric excess was determined by HPLC analysis, using chiral column described below in detail. Optical rotations were measured by polarimeter. Flash column chromatography was performed on silica gel (200-300 mesh). All reactions were monitored by TLC analysis.

**Materials:** Commercially available reagents were used throughout without further purification. The anhydrous solvents for asymmetric transfer hydrogenation were also purchased without the further purification.

## 2. General Procedure for Synthesis of 3,4-Dihydropyrimidin-2-one

3,4-Dihydropyrimidin-2-one derivatives **1** can be conveniently prepared according to the known literature procedure with some minor modifications.<sup>1,2</sup> The compound **1m**, **1l** are known.<sup>2</sup>

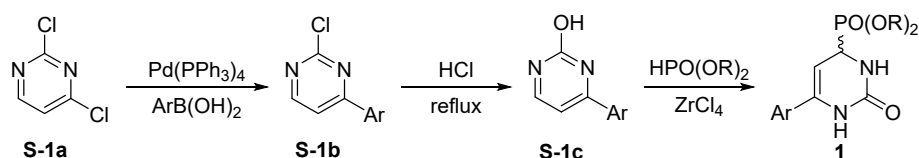

**General procedure:** A mixture of 2,4-dichloropyrimidine **S-1a** (2.959 g, 20 mmol), the corresponding arylboronic acid (20 mmol),  $\text{Pd}(\text{PPh}_3)_4$  (0.231 g, 0.2 mmol) and sodium carbonate (2.119 g, 20 mmol) in acetonitrile (25 mL) and water (25 mL) was stirred at reflux for 8 h, then cooled to ambient temperature, then extracted with ethyl acetate (50 mL  $\times$  3). The combined organic layer was dried over anhydrous sodium sulfate. After filtration, the solvent was removed under the reduced pressure, and the residue was purified by flash chromatography on silica gel to give the corresponding products **S-1b**.

Subsequently, the above **S-1b** (10 mmol) in 38% hydrogen chloride aqueous solution (5.0 mL) was stirred at 100  $^\circ\text{C}$  for 5 h before the mixture was cooled and the pH adjusted to 7 with aqueous sodium hydroxide (1.0 M). The most water was removed under reduced pressure and the residue was extracted with chloroform (30 mL  $\times$  3). The combined organic layer was dried over anhydrous sodium sulfate. After filtration, the solvent was removed under reduced pressure and the crude product purified by flash chromatography on silica gel to give the corresponding products **S-1c**.

A mixture of 2-hydroxypyrimidine **S-1c** (4 mmol), diisopropyl phosphonate (8 mmol, 2 equiv), and zirconium chloride (0.2 mmol, 5 mol%) in tetrahydrofuran (20 mL) was stirred at room temperature for 24 h. After the reaction was completed (determined by TLC), the solvent was removed under the reduced pressure. The residue was purified by flash chromatography on silica gel using the ethyl acetate/ triethylamine as eluent to give the racemic of 3,4-dihydropyrimidin-2-one derivatives **1**.

### 3. General Procedure for Redox Deracemization

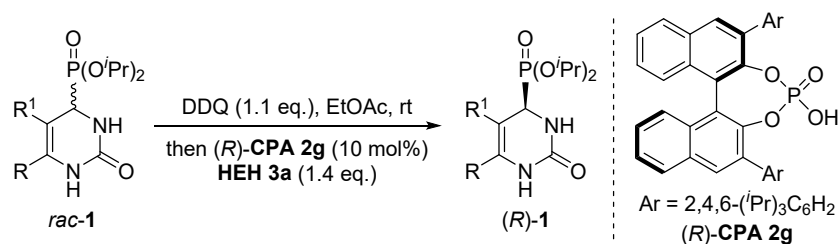

A racemic of 3,4-Dihydropyrimidin-2-one derivatives **1** (0.10 mmol), DDQ (25 mg, 0.11 mmol, 1.1 equiv) in ethyl acetate (4 mL) was stirred at room temperature for 5 min. After the reaction was completed (determined by TLC), chiral phosphoric acid (*R*)-**2g** (7.5 mg, 0.01 mmol, 10 mol%) and Hantzsch ester **3a** (31.5 mg, 0.14 mmol, 1.4 equiv) was added. The mixture was stirred at room temperature for 24 h. The resulting mixture was concentrated in *vacuo* and further purification was performed by a silica gel column eluted with dichloromethane/methanol to give the optically active products **1**. The enantiomeric excesses were determined by chiral HPLC.

**Diisopropyl (*R*)-(2-oxo-6-phenyl-1,2,3,4-tetrahydropyrimidin-4-yl)phosphonate (1a):** 31 mg, 92% yield, new compound, white solid, mp: 157-158 °C,  $R_f = 0.40$  (dichloromethane/ methanol

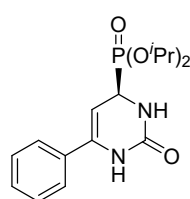

= 10/1), 96% ee,  $[\alpha]_D^{20} = -26.45$  ( $c$  0.31, MeOH),  $^1\text{H NMR}$  (400 MHz,  $\text{CDCl}_3$ )  $\delta$  7.47-7.41 (m, 5H), 6.79 (s, 1H), 5.29 (s, 1H), 5.10 (s, 1H), 4.83-4.75 (m, 2H), 4.52-4.49 (m, 1H), 1.38-1.31 (m, 12H).  $^{13}\text{C NMR}$  (100 MHz,  $\text{CDCl}_3$ )  $\delta$  153.8, 138.3, 134.1 (d,  $J = 3.2$  Hz), 129.3, 128.8, 125.1, 90.7 (d,  $J = 9.1$  Hz), 72.2 (d,  $J = 7.7$  Hz), 71.8 (d,  $J = 7.7$  Hz), 51.8 (d,  $J = 160.5$  Hz), 24.3 (d,  $J = 3.3$  Hz), 24.1 (d,  $J = 3.2$  Hz), 24.1 (d,  $J = 4.0$  Hz), 23.9 (d,  $J = 5.1$  Hz).  $^{31}\text{P NMR}$  (162

MHz,  $\text{CDCl}_3$ )  $\delta$  16.0. HPLC: Chiracel AD column, 254 nm, 30 °C, *n*-hexane/*i*-propanol = 80/20, flow = 1.0 mL/min, retention time 6.3 min (maj) and 7.2 min. HRMS (ESI)  $m/z$  calculated for  $\text{C}_{16}\text{H}_{24}\text{N}_2\text{O}_4\text{P}$   $[\text{M}+\text{H}]^+$  339.1464, found 339.1466.

**Diisopropyl (*R*)-(2-oxo-6-(*p*-tolyl)-1,2,3,4-tetrahydropyrimidin-4-yl)phosphonate (1b):** 33 mg, 94% yield, new compound, white solid, mp: 168-169 °C,  $R_f = 0.40$  (dichloromethane/ methanol

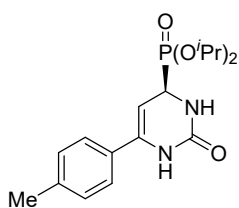

= 10/1), 94% ee,  $[\alpha]_D^{20} = -42.12$  ( $c$  0.33, MeOH).  $^1\text{H NMR}$  (400 MHz,  $\text{CDCl}_3$ )  $\delta$  7.64 (s, 1H), 7.35 (d,  $J = 8.1$  Hz, 2H), 7.18 (d,  $J = 8.1$  Hz, 2H), 5.74 (s, 1H), 5.03-5.02 (m, 1H), 4.78- 4.73 (m, 2H), 4.45-4.42 (m, 1H), 2.35 (s, 3H), 1.35-1.27 (m, 12H).  $^{13}\text{C NMR}$  (100 MHz,  $\text{CDCl}_3$ )  $\delta$  154.1, 139.3, 138.3 (d,  $J = 10.8$  Hz), 131.2 (d,  $J = 3.1$  Hz), 129.5, 125.0 (d,  $J = 1.6$  Hz),

89.8 (d,  $J = 9.2$  Hz), 72.2 (d,  $J = 7.6$  Hz), 71.7 (d,  $J = 7.9$  Hz), 51.7 (d,  $J = 160.5$  Hz), 24.3 (d,  $J = 3.0$  Hz), 24.1 (d,  $J = 3.3$  Hz), 24.1 (d,  $J = 1.5$  Hz), 23.9 (d,  $J = 5.2$  Hz), 21.3.  $^{31}\text{P NMR}$  (162 MHz,  $\text{CDCl}_3$ )  $\delta$  16.2. HPLC: Chiracel AD column, 254 nm, 30 °C, *n*-hexane/*i*-propanol = 80/20, flow = 1.0 mL/min, retention time 6.9 min (maj) and 7.8 min. HRMS (ESI)  $m/z$  calculated for  $\text{C}_{17}\text{H}_{26}\text{N}_2\text{O}_4\text{P}$   $[\text{M}+\text{H}]^+$  353.1626, found 353.1625.

**Diisopropyl (*R*)-(2-oxo-6-(*m*-tolyl)-1,2,3,4-tetrahydropyrimidin-4-yl)phosphonate (1c):** 34

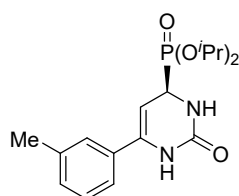

mg, 96% yield, new compound, white solid, mp: 129-130 °C,  $R_f$  = 0.40 (dichloromethane/ methanol = 10/1), 92% ee,  $[\alpha]_D^{20}$  = -52.43 ( $c$  0.34, MeOH).  $^1\text{H}$  NMR (400 MHz,  $\text{CDCl}_3$ )  $\delta$  7.53 (s, 1H), 7.29-7.24 (m, 3H), 7.18 (d,  $J$  = 5.9 Hz, 1H), 5.75 (s, 1H), 5.05 (s, 1H), 4.81-4.71 (m, 2H), 4.44 (d,  $J$  = 3.9 Hz, 1H), 2.37 (s, 3H), 1.35-1.28 (m, 12H).  $^{13}\text{C}$  NMR (100 MHz,  $\text{CDCl}_3$ )  $\delta$  154.0, 138.5, 134.0 (d,  $J$  = 3.2 Hz), 130.0 (d,  $J$  = 4.2 Hz), 128.7 (d,  $J$  = 5.2 Hz), 125.8, 122.2, 90.4 (d,  $J$  = 7.8 Hz), 72.2 (d,  $J$  = 6.8 Hz), 71.8 (d,  $J$  = 7.2 Hz), 51.7 (d,  $J$  = 159.7 Hz), 24.3 (d,  $J$  = 3.1 Hz), 24.1 (d,  $J$  = 3.0 Hz), 24.1 (d,  $J$  = 8.5 Hz), 23.9 (d,  $J$  = 5.1 Hz), 21.4.  $^{31}\text{P}$  NMR (162 MHz,  $\text{CDCl}_3$ )  $\delta$  16.1. HPLC: Chiracel AD column, 254 nm, 30 °C, *n*-hexane/*i*-propanol = 80/20, flow = 1.0 mL/min, retention time 5.3 min (maj) and 6.3 min. HRMS (ESI)  $m/z$  calculated for  $\text{C}_{17}\text{H}_{26}\text{N}_2\text{O}_4\text{P}$   $[\text{M}+\text{H}]^+$  353.1626, found 353.1624.

**Diisopropyl (R)-(6-(3,4-dimethylphenyl)-2-oxo-1,2,3,4-tetrahydropyrimidin-4-yl)phosphonate (1d):** 36 mg, 98% yield, new compound, white solid, mp: 132-133 °C,  $R_f$  = 0.40

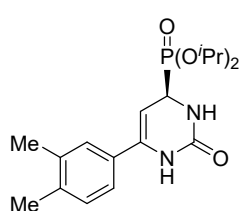

(dichloromethane/methanol = 10/1), 90% ee,  $[\alpha]_D^{20}$  = -39.72 ( $c$  0.36, MeOH).  $^1\text{H}$  NMR (400 MHz,  $\text{CDCl}_3$ )  $\delta$  7.22 (s, 1H), 7.17 (d,  $J$  = 0.8 Hz, 2H), 6.69 (s, 1H), 5.28 (s, 1H), 5.07-5.05 (m, 1H), 4.82-4.73 (m, 2H), 4.51-4.48 (m, 1H), 2.29 (d,  $J$  = 2.5 Hz, 6H), 1.38-1.30 (m, 12H).  $^{13}\text{C}$  NMR (100 MHz,  $\text{CDCl}_3$ )  $\delta$  154.1, 138.3 (d,  $J$  = 10.7 Hz), 138.0, 137.1, 131.5 (d,  $J$  = 3.0 Hz), 130.0, 126.2, 122.4, 89.6 (d,  $J$  = 9.0 Hz), 72.2 (d,  $J$  = 7.6 Hz), 71.7 (d,  $J$  = 7.9 Hz), 51.7 (d,  $J$  = 160.2 Hz), 24.3 (d,  $J$  = 2.9 Hz), 24.1 (d,  $J$  = 4.1 Hz), 23.9 (d,  $J$  = 5.2 Hz), 19.8, 19.6.  $^{31}\text{P}$  NMR (162 MHz,  $\text{CDCl}_3$ )  $\delta$  16.2. HPLC: Chiracel AD column, 254 nm, 30 °C, *n*-hexane/*i*-propanol = 80/20, flow = 1.0 mL/min, retention time 5.9 min (maj) and 6.9 min. HRMS (ESI)  $m/z$  calculated for  $\text{C}_{18}\text{H}_{28}\text{N}_2\text{O}_4\text{P}$   $[\text{M}+\text{H}]^+$  367.1778, found 367.1777.

**Diisopropyl (R)-(6-(4-isopropylphenyl)-2-oxo-1,2,3,4-tetrahydropyrimidin-4-yl)phosphonate (1e):** 35 mg, 92% yield, new compound, white solid, mp: 158-159 °C,  $R_f$  = 0.40

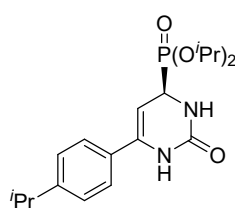

(dichloromethane/methanol = 10/1), 94% ee,  $[\alpha]_D^{20}$  = -39.43 ( $c$  0.35, MeOH).  $^1\text{H}$  NMR (400 MHz,  $\text{CDCl}_3$ )  $\delta$  7.52 (s, 1H), 7.38 (d,  $J$  = 8.2 Hz, 2H), 7.24 (d,  $J$  = 8.3 Hz, 2H), 5.69 (s, 1H), 5.03 (dd,  $J$  = 5.2, 3.4 Hz, 1H), 4.77-4.74 (m, 2H), 4.48-4.46 (m, 1H), 2.94-2.88 (m, 1H), 1.35-1.28 (m, 12H), 1.24 (d,  $J$  = 6.9 Hz, 6H).  $^{13}\text{C}$  NMR (100 MHz,  $\text{CDCl}_3$ )  $\delta$  154.0, 150.2, 138.2 (d,  $J$  = 10.9 Hz), 131.5 (d,  $J$  = 3.3 Hz), 126.9, 125.1 (d,  $J$  = 1.8 Hz), 89.9 (d,  $J$  = 9.1 Hz), 72.1 (d,  $J$  = 7.6 Hz), 71.8 (d,  $J$  = 7.6 Hz), 51.7 (d,  $J$  = 160.4 Hz), 33.9, 24.3 (d,  $J$  = 3.0 Hz), 24.2 (d,  $J$  = 3.1 Hz), 24.1 (d,  $J$  = 4.0 Hz), 23.9 (d,  $J$  = 5.2 Hz), 23.8.  $^{31}\text{P}$  NMR (162 MHz,  $\text{CDCl}_3$ )  $\delta$  16.2. HPLC: Chiracel OD column, 254 nm, 30 °C, *n*-hexane/*i*-propanol = 80/20, flow = 1.0 mL/min, retention time 7.1 min (maj) and 7.7 min. HRMS (ESI)  $m/z$  calculated for  $\text{C}_{19}\text{H}_{30}\text{N}_2\text{O}_4\text{P}$   $[\text{M}+\text{H}]^+$  381.1934, found 381.1932.

**Diisopropyl (R)-(6-(4-(tert-butyl)phenyl)-2-oxo-1,2,3,4-tetrahydropyrimidin-4-yl)phosphonate (1f):** 37 mg, 94% yield, new compound, white solid, mp: 191-192 °C,  $R_f$  = 0.40

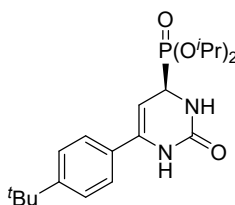

(dichloromethane/methanol = 10/1), 95% ee,  $[\alpha]^{20}_D = -35.41$  (*c* 0.37, MeOH).  $^1\text{H}$  NMR (400 MHz,  $\text{CDCl}_3$ )  $\delta$  7.53 (s, 1H), 7.40 (s, 4H), 5.70 (s, 1H), 5.06-5.04 (m, 1H), 4.81-4.71 (m, 2H), 4.48-4.46 (m, 1H), 1.36-1.28 (m, 21H).  $^{13}\text{C}$  NMR (100 MHz,  $\text{CDCl}_3$ )  $\delta$  154.0, 152.4, 138.1 (d,  $J = 10.8$  Hz), 131.1, 125.7, 124.8, 90.0 (d,  $J = 9.3$  Hz), 72.1 (d,  $J = 7.6$  Hz), 71.8 (d,  $J = 7.7$  Hz), 51.8 (d,  $J = 160.5$  Hz), 34.7, 31.2, 24.3 (d,  $J = 3.2$  Hz), 24.2 (d,  $J = 3.3$  Hz), 24.1 (d,  $J = 4.3$  Hz), 23.9 (d,  $J = 5.1$  Hz).  $^{31}\text{P}$  NMR (162 MHz,  $\text{CDCl}_3$ )  $\delta$  16.1. HPLC: Chiracel AD column, 254 nm, 30 °C, *n*-hexane/*i*-propanol = 80/20, flow = 1.0 mL/min, retention time 6.3 min and 7.1 min (maj). HRMS (ESI)  $m/z$  calculated for  $\text{C}_{20}\text{H}_{32}\text{N}_2\text{O}_4\text{P}$   $[\text{M}+\text{H}]^+$  395.2093, found 395.2092.

**Diisopropyl (R)-(6-(4-chlorophenyl)-2-oxo-1,2,3,4-tetrahydropyrimidin-4-yl)phosphonate**

**(1g):** 35 mg, 94% yield, new compound, white solid, mp: 184-185 °C,  $R_f = 0.40$  (dichloromethane/

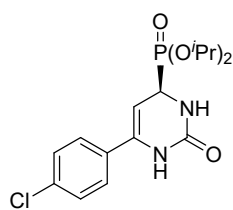

methanol = 10/1), 95% ee,  $[\alpha]^{20}_D = -39.72$  (*c* 0.35, MeOH).  $^1\text{H}$  NMR (400 MHz,  $\text{DMSO-d}_6$ )  $\delta$  8.64 (s, 1H), 7.51 (d,  $J = 8.6$  Hz, 2H), 7.46-7.44 (m, 2H), 6.95 (s, 1H), 5.00-4.98 (m, 1H), 4.65-4.56 (m, 2H), 4.34-4.30 (m, 1H), 1.30-1.18 (m, 12H).  $^{13}\text{C}$  NMR (100 MHz,  $\text{DMSO-d}_6$ )  $\delta$  153.7, 138.0 (d,  $J = 9.9$  Hz), 133.8, 133.2 (d,  $J = 3.8$  Hz), 129.0, 127.6 (d,  $J = 1.4$  Hz), 91.9 (d,  $J = 7.7$  Hz), 71.4 (d,  $J = 7.6$  Hz), 71.2 (d,  $J = 7.6$  Hz), 50.9 (d,  $J = 158.5$  Hz), 24.5 (d,  $J = 3.0$  Hz), 24.4 (d,  $J = 3.5$  Hz), 24.2 (d,  $J = 4.7$  Hz), 24.1 (d,  $J = 5.0$  Hz).  $^{31}\text{P}$  NMR (162 MHz,  $\text{DMSO-d}_6$ )  $\delta$  17.4. HPLC: Chiracel OD column, 254 nm, 30 °C, *n*-hexane/*i*-propanol = 80/20, flow = 1.0 mL/min, retention time 6.3 min and 7.4 min (maj). HRMS (ESI)  $m/z$  calculated for  $\text{C}_{16}\text{H}_{23}\text{ClN}_2\text{O}_4\text{P}$   $[\text{M}+\text{H}]^+$  373.0894, found 373.0893.

**Diisopropyl (R)-(6-(3-chlorophenyl)-2-oxo-1,2,3,4-tetrahydropyrimidin-4-yl)phosphonate**

**(1h):** 36 mg, 97% yield, new compound, white solid, mp: 165-166 °C,  $R_f = 0.40$

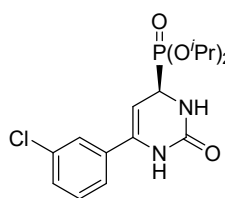

(dichloromethane/methanol = 10/1), 93% ee,  $[\alpha]^{20}_D = -56.39$  (*c* 0.36, MeOH).  $^1\text{H}$  NMR (400 MHz,  $\text{CDCl}_3$ )  $\delta$  8.20 (s, 1H), 7.44 (s, 1H), 7.32 (d,  $J = 7.2$  Hz, 3H), 5.88 (s, 1H), 5.05 (s, 1H), 4.79 - 4.71 (m, 2H), 4.45-4.43 (m, 1H), 1.34-1.27 (m, 12H).  $^{13}\text{C}$  NMR (100 MHz,  $\text{CDCl}_3$ )  $\delta$  154.2, 137.3 (d,  $J = 10.8$  Hz), 135.7 (d,  $J = 2.9$  Hz), 134.7, 130.0, 129.2, 125.5, 123.4, 91.7 (d,  $J = 9.3$  Hz), 72.2 (d,  $J = 7.5$  Hz), 72.0 (d,  $J = 7.7$  Hz), 51.7 (d,  $J = 160.8$  Hz), 24.2 (d,  $J = 3.0$  Hz), 24.1 (d,  $J = 3.8$  Hz), 24.1 (d,  $J = 6.4$  Hz), 23.9 (d,  $J = 5.1$  Hz).  $^{31}\text{P}$  NMR (162 MHz,  $\text{CDCl}_3$ )  $\delta$  15.9. HPLC: Chiracel AD column, 254 nm, 30 °C, *n*-hexane/*i*-propanol = 80/20, flow = 1.0 mL/min, retention time 5.7 min (maj) and 7.0 min. HRMS (ESI)  $m/z$  calculated for  $\text{C}_{16}\text{H}_{23}\text{ClN}_2\text{O}_4\text{P}$   $[\text{M}+\text{H}]^+$  373.0894, found 373.0891.

**Diisopropyl (R)-(6-(4-ethylphenyl)-2-oxo-1,2,3,4-tetrahydropyrimidin-4-yl)phosphonate**

**(1i):** 34 mg, 93% yield, new compound, white solid, mp: 156-157 °C,  $R_f = 0.40$  (dichloromethane/

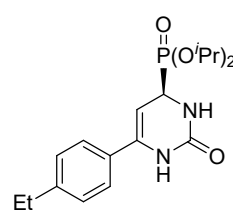

methanol = 10/1), 81% ee,  $[\alpha]^{20}_D = -34.72$  (*c* 0.36, MeOH).  $^1\text{H}$  NMR (400 MHz,  $\text{CDCl}_3$ )  $\delta$  7.51 (s, 1H), 7.37 (d,  $J = 6.5$  Hz, 2H), 7.21 (d,  $J = 6.4$  Hz, 2H), 5.69 (s, 1H), 5.03 (s, 1H), 4.75 (s, 2H), 4.45 (s, 1H), 2.64 (d,  $J = 6.7$  Hz, 2H), 1.33-1.23 (m, 15H).  $^{13}\text{C}$  NMR (100 MHz,  $\text{CDCl}_3$ )  $\delta$  154.0, 145.6, 138.2 (d,  $J = 11.0$  Hz), 131.4, 128.3, 125.0, 89.9 (d,  $J = 9.2$  Hz), 72.2 (d,  $J = 7.6$  Hz), 71.8 (d,  $J = 7.7$  Hz), 51.8 (d,  $J = 160.5$  Hz), 34.7, 31.2, 24.3 (d,  $J = 3.2$  Hz), 24.2 (d,  $J = 3.3$  Hz), 24.1 (d,  $J = 4.3$  Hz), 23.9 (d,  $J = 5.1$  Hz).

= 7.7 Hz), 71.8 (d,  $J = 7.9$  Hz), 51.7 (d,  $J = 160.5$  Hz), 28.6, 24.3 (d,  $J = 2.8$  Hz), 24.1 (d,  $J = 3.8$  Hz), 23.9 (d,  $J = 5.2$  Hz), 15.33 (s).  $^{31}\text{P}$  NMR (162 MHz,  $\text{CDCl}_3$ )  $\delta$  16.2. HPLC: Chiracel AD column, 254 nm, 30 °C, *n*-hexane/*i*-propanol = 80/20, flow = 1.0 mL/min, retention time 7.1 min (maj) and 7.7 min. HRMS (ESI)  $m/z$  calculated for  $\text{C}_{18}\text{H}_{28}\text{N}_2\text{O}_4\text{P}$   $[\text{M}+\text{H}]^+$  367.1784, found 367.1781.

**Diisopropyl (R)-(6-(naphthalen-2-yl)-2-oxo-1,2,3,4-tetrahydropyrimidin-4-yl)phosphonate (1j):** 30 mg, 77% yield, new compound, white solid, mp: 156-157 °C,  $R_f = 0.40$  (dichloromethane/

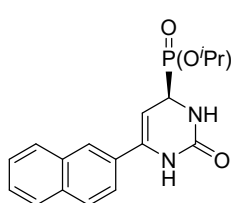

methanol = 10/1), 49% ee,  $[\alpha]_D^{20} = -74.58$  ( $c$  0.30, MeOH).  $^1\text{H}$  NMR (400 MHz,  $\text{CDCl}_3$ )  $\delta$  8.26-8.23 (m, 1H), 7.85-7.84 (m, 2H), 7.51-7.48 (m, 4H), 6.85 (s, 1H), 5.77 (s, 1H), 4.93-4.91 (m, 1H), 4.83-4.72 (m, 2H), 4.53-4.50 (m, 1H), 1.40-1.33 (m, 12H).  $^{13}\text{C}$  NMR (100 MHz,  $\text{CDCl}_3$ )  $\delta$  153.2, 137.2 (d,  $J = 10.4$  Hz), 133.7, 132.7 (d,  $J = 2.7$  Hz), 130.8 (d,  $J = 1.9$  Hz), 129.6, 128.4, 126.6, 126.3, 126.1 (d,  $J = 2.9$  Hz), 125.2, 125.1, 94.2 (d,  $J = 9.1$  Hz), 72.1 (d,  $J = 7.4$  Hz), 71.7 (d,  $J = 7.7$  Hz), 51.9 (d,  $J = 161.1$  Hz), 24.3 (d,  $J = 3.6$  Hz), 24.2, 24.1, 24.0.  $^{31}\text{P}$  NMR (162 MHz,  $\text{CDCl}_3$ )  $\delta$  16.3. HPLC: Chiracel AD column, 254 nm, 30 °C, *n*-hexane/*i*-propanol = 80/20, flow = 1.0 mL/min, retention time 5.9 min (maj) and 7.7 min. HRMS (ESI)  $m/z$  calculated for  $\text{C}_{20}\text{H}_{26}\text{N}_2\text{O}_4\text{P}$   $[\text{M}+\text{H}]^+$  389.1624, found 389.1627.

**Diethyl (R)-(2-oxo-6-phenyl-1,2,3,4-tetrahydropyrimidin-4-yl)phosphonate (1k):** 30 mg, 97% yield, new compound, white solid, mp: 157-158 °C,  $R_f = 0.40$  (dichloromethane/methanol = 10/1),

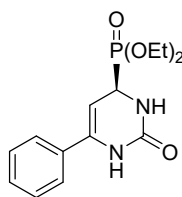

90% ee,  $[\alpha]_D^{20} = -35.68$  ( $c$  0.30, MeOH).  $^1\text{H}$  NMR (400 MHz,  $\text{CDCl}_3$ )  $\delta$  7.91 (s, 1H), 7.52-7.41 (m, 2H), 7.39-7.36 (m, 3H), 6.27 (s, 1H), 5.06 (s, 1H), 4.45-4.42 (m, 1H), 4.20-4.13 (m, 4H), 1.36-1.28 (m, 6H).  $^{13}\text{C}$  NMR (100 MHz,  $\text{CDCl}_3$ )  $\delta$  154.5, 138.7 (d,  $J = 10.5$  Hz), 133.8 (d,  $J = 3.4$  Hz), 129.3, 128.8, 125.2 (d,  $J = 1.9$  Hz), 90.4 (d,  $J = 8.8$  Hz), 63.6 (d,  $J = 7.3$  Hz), 63.0 (d,  $J = 7.5$  Hz), 51.0 (d,  $J = 158.8$  Hz), 16.6 (d,  $J = 5.0$  Hz), 16.5 (d,  $J = 5.3$  Hz).  $^{31}\text{P}$  NMR (162 MHz,  $\text{CDCl}_3$ )  $\delta$  18.0. HPLC: Chiracel AD column, 254 nm, 30 °C, *n*-hexane/*i*-propanol = 80/20, flow = 1.0 mL/min, retention time 8.2 min (maj) and 8.9 min. HRMS (ESI)  $m/z$  calculated for  $\text{C}_{14}\text{H}_{20}\text{N}_2\text{O}_4\text{P}$   $[\text{M}+\text{H}]^+$  311.1117, found 311.1116.

**Diisopropyl (R)-(6-methyl-2-oxo-1,2,3,4-tetrahydropyrimidin-4-yl)phosphonate (1l):** 26 mg, 94% yield, white solid, mp: 122-123 °C,  $R_f = 0.40$  (dichloromethane/methanol = 10/1), 5% ee,  $[\alpha]_D^{20}$

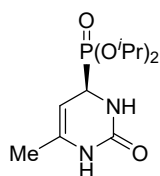

= -4.77 ( $c$  0.26, MeOH).  $^1\text{H}$  NMR (400 MHz,  $\text{CDCl}_3$ )  $\delta$  7.40 (s, 1H), 5.24 (s, 1H), 4.79-4.72 (m, 2H), 4.53 (s, 1H), 4.31-4.30 (m, 1H), 1.80 (d,  $J = 4.5$  Hz, 3H), 1.35-1.31 (m, 12H).  $^{13}\text{C}$  NMR (100 MHz,  $\text{CDCl}_3$ )  $\delta$  154.3, 135.1 (d,  $J = 10.3$  Hz), 88.9 (d,  $J = 8.4$  Hz), 71.9 (d,  $J = 7.7$  Hz), 71.6 (d,  $J = 7.8$  Hz), 51.4 (d,  $J = 161.2$  Hz), 24.2 (d,  $J = 3.4$  Hz), 24.1 (d,  $J = 3.6$  Hz), 24.0 (d,  $J = 4.6$  Hz), 23.8 (d,  $J = 5.1$  Hz), 18.5 (d,  $J = 2.5$  Hz).  $^{31}\text{P}$  NMR (162 MHz,  $\text{CDCl}_3$ )  $\delta$  16.6. HPLC: Chiracel AD column, 254 nm, 30 °C, *n*-hexane/*i*-propanol = 80/20, flow = 1.0 mL/min, retention time 5.2 min and 6.6 min (maj). HRMS (ESI)  $m/z$  calculated for  $\text{C}_{11}\text{H}_{22}\text{N}_2\text{O}_4\text{P}$   $[\text{M}+\text{H}]^+$  277.1313, found 277.1312.

**Diisopropyl (R)-(5-methyl-2-oxo-6-phenyl-1,2,3,4-tetrahydropyrimidin-4-yl)phosphonate**

**(1m)**: 33 mg, 94% yield, white solid, mp: 158-159 °C,  $R_f = 0.40$  (dichloromethane/methanol = 10/1), 84% ee,  $[\alpha]^{20}_D = -18.21$  ( $c$  0.33, MeOH).  $^1H$  NMR (400 MHz,  $CDCl_3$ )  $\delta$  7.40-7.31 (m, 5H), 6.50 (s, 1H), 5.53 (s, 1H), 4.81-4.75 (m, 2H), 4.13 (d,  $J = 8.1$  Hz, 1H), 1.82 (s, 3H), 1.37-1.34 (m, 12H).  $^{13}C$  NMR (100 MHz,  $CDCl_3$ )  $\delta$  153.8, 134.8 (d,  $J = 3.6$  Hz), 133.2 (d,  $J = 9.8$  Hz), 128.8, 128.7, 128.4 (d,  $J = 2.8$  Hz), 99.2 (d,  $J = 6.4$  Hz), 72.1 (d,  $J = 7.9$  Hz), 71.5 (d,  $J = 7.8$  Hz), 56.3 (d,  $J = 155.6$  Hz), 24.4 (d,  $J = 3.1$  Hz), 24.2, 24.1, 24.0 (d,  $J = 5.0$  Hz), 16.7 (d,  $J = 1.5$  Hz).  $^{31}P$  NMR (162 MHz,  $CDCl_3$ )  $\delta$  16.9. HPLC: Chiracel AD column, 254 nm, 30 °C, *n*-hexane/*i*-propanol = 80/20, flow = 1.0 mL/min, retention time 5.2 min (maj) and 6.4 min. HRMS (ESI)  $m/z$  calculated for  $C_{17}H_{26}N_2O_4P$   $[M+H]^+$  353.1654, found 353.1652.

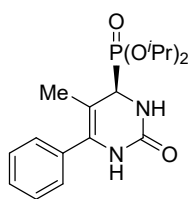

**Diisopropyl (R)-(6-(3-methoxyphenyl)-5-methyl-2-oxo-1,2,3,4-tetrahydropyrimidin-4-yl) phosphonate (1n)**: 37 mg, 97% yield, new compound, white solid, mp: 153-154 °C,  $R_f = 0.40$  (dichloromethane/methanol = 10/1), 80% ee,  $[\alpha]^{20}_D = -11.62$  ( $c$  0.37, MeOH).  $^1H$  NMR (400 MHz,  $CDCl_3$ )  $\delta$  7.33-7.28 (m, 1H), 6.91-6.85 (m, 3H), 6.43 (s, 1H), 5.47 (s, 1H), 4.80-4.75 (m, 2H), 4.12 (d,  $J = 8.2$  Hz, 1H), 3.81 (s, 3H), 1.83 (s, 3H), 1.36 (t,  $J = 6.2$  Hz, 12H).  $^{13}C$  NMR (100 MHz,  $CDCl_3$ )  $\delta$  159.7, 153.6, 136.1 (d,  $J = 3.4$  Hz), 133.0 (d,  $J = 10.0$  Hz), 129.8, 120.8 (d,  $J = 2.8$  Hz), 114.5, 113.9 (d,  $J = 2.8$  Hz), 99.3 (d,  $J = 6.4$  Hz), 72.1 (d,  $J = 7.9$  Hz), 71.5 (d,  $J = 7.7$  Hz), 56.3 (d,  $J = 155.6$  Hz), 55.3, 24.4 (d,  $J = 3.1$  Hz), 24.2, 24.1, 24.0 (d,  $J = 5.0$  Hz), 16.8 (d,  $J = 1.4$  Hz).  $^{31}P$  NMR (162 MHz,  $CDCl_3$ )  $\delta$  16.9. HPLC: Chiracel AD column, 254 nm, 30 °C, *n*-hexane/*i*-propanol = 80/20, flow = 1.0 mL/min, retention time 5.9 min (maj) and 7.8 min. HRMS (ESI)  $m/z$  calculated for  $C_{18}H_{28}N_2O_5P$   $[M+H]^+$  383.1727, found 383.1729.

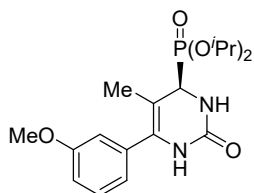

**Diisopropyl (R)-(2-oxo-5,6-diphenyl-1,2,3,4-tetrahydropyrimidin-4-yl) phosphonate (1o)**: 39 mg, 94% yield, new compound, white solid, mp: 188-189 °C,  $R_f = 0.40$  (dichloromethane/methanol = 10/1), 88% ee,  $[\alpha]^{20}_D = -19.23$  ( $c$  0.39, MeOH).  $^1H$  NMR (400 MHz,  $CDCl_3$ )  $\delta$  7.26-7.11 (m, 10H), 6.44 (s, 1H), 5.57 (s, 1H), 4.77-4.71 (m, 1H), 4.70-4.60 (m, 2H), 1.36-1.30 (m, 6H), 1.16-1.10 (m, 6H).  $^{13}C$  NMR (100 MHz,  $CDCl_3$ )  $\delta$  154.2, 137.0 (d,  $J = 4.7$  Hz), 135.4, 135.0 (d,  $J = 3.4$  Hz), 130.3, 128.6, 128.4, 128.0, 126.7, 118.8, 105.3 (d,  $J = 4.0$  Hz), 71.7 (d,  $J = 8.0$  Hz), 56.0 (d,  $J = 157.5$  Hz), 24.3 (d,  $J = 3.1$  Hz), 24.1 (d,  $J = 4.4$  Hz), 24.0 (d,  $J = 2.8$  Hz), 23.6 (d,  $J = 4.9$  Hz).  $^{31}P$  NMR (162 MHz,  $CDCl_3$ )  $\delta$  17.4. HPLC: Chiracel AD column, 254 nm, 30 °C, *n*-hexane/*i*-propanol = 80/20, flow = 1.0 mL/min, retention time 5.8 min (maj) and 7.6 min. HRMS (ESI)  $m/z$  calculated for  $C_{22}H_{28}N_2O_4P$   $[M+H]^+$  415.1783, found 415.1781.

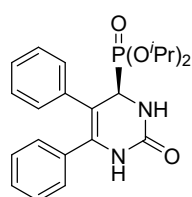

Failed example:

Under standard conditions, the redox deracemization of 4-(diphenylphosphoryl)-5-methyl-6-phenyl-3,4-dihydropyrimidin-2(1H)-one, in which the isopropoxy group is replaced with a phenyl group, the reaction only underwent oxidation, without observation reduction products, the starting

material was recovered.

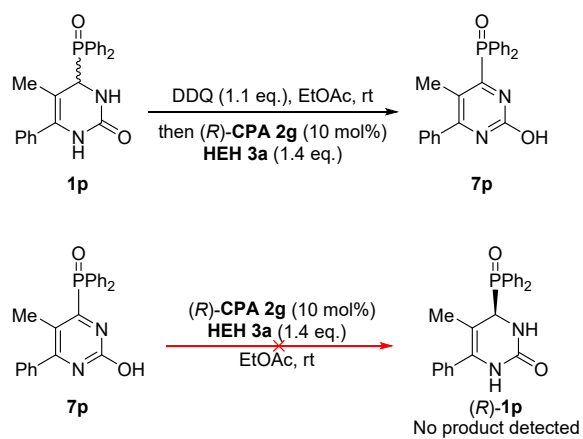



## 4. Determination of Absolute Configuration of Products

### 4.1 Determination of Absolute Configuration of Products **4m**

To determine the absolute configuration of **4m** (93% ee), firstly, **4m** was upgraded to >99% ee by recrystallization with *n*-hexane/ethyl acetate. Then, *n*-hexane was slowly added into the solution of **4m** in ethyl acetate at 50 °C, then the solution was slowly cooled down to room temperature. The crystal was grown from the solution, which is suitable for X-ray diffraction analysis. The structure in **Figure S2** showed that the absolute configuration of **4m** is (*R*). [CCDC 2080219] contains the structure and supplementary crystallographic data for (*R*)-**4m**. These data can be obtained free of charge from the Cambridge Crystallographic Data Centre *via* [www.ccdc.cam.ac.uk](http://www.ccdc.cam.ac.uk).

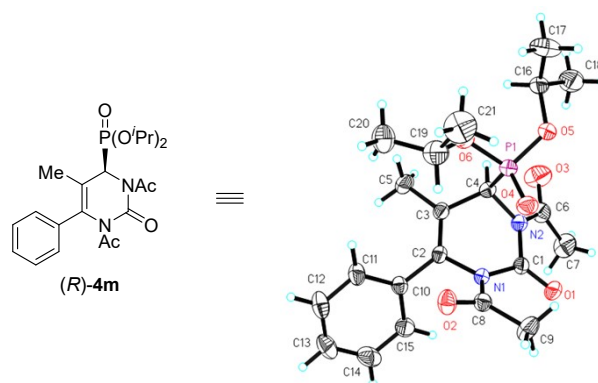

**Figure S2.** X-ray crystallographic analysis of (*R*)-**4m** [CCDC 2080219]

ORTEP diagram of compound **4m**, thermal ellipsoids are drawn on 30% probability level

Crystal data and structure refinement for **4m**.

|                      |                                                                 |
|----------------------|-----------------------------------------------------------------|
| Identification code  | <b>4m</b>                                                       |
| Empirical formula    | C <sub>21</sub> H <sub>29</sub> N <sub>2</sub> O <sub>6</sub> P |
| Formula weight       | 436.43                                                          |
| Temperature          | 293(2) K                                                        |
| Wavelength           | 0.71073 Å                                                       |
| Crystal system       | monoclinic                                                      |
| Space group          | P 21                                                            |
| Volume               | 1162.84(4) Å <sup>3</sup>                                       |
| Z                    | 2                                                               |
| Density (calculated) | 1.246 Mg/m <sup>3</sup>                                         |

|                                   |                                       |
|-----------------------------------|---------------------------------------|
| Absorption coefficient            | 0.155 mm <sup>-1</sup>                |
| F(000)                            | 464                                   |
| Crystal size                      | 0.200 x 0.160 x 0.130 mm <sup>3</sup> |
| Theta range for data collection   | 2.832 to 26.000°.                     |
| Goodness-of-fit on F <sup>2</sup> | 1.054                                 |
| Flack                             | 0.02(3)                               |
| Extinction coefficient            | 0.031(11)                             |

#### 4.2 Determination of Absolute Configuration of Products 4a

A racemic of 3,4-Dihydropyrimidin-2-one derivatives **1a** (1.352 g, 4.0 mmol), DDQ (0.999 g, 4.4 mmol, 1.1 equiv) in ethyl acetate (50 mL) was stirred at room temperature for 10 min. After the reaction was completed (determined by TLC), chiral phosphoric acid (*S*)-**2g** (0.301 g, 0.4 mmol, 10 mol%) and Hantzsch ester **3a** (1.261 g, 5.6 mmol, 1.4 equiv) was added. The mixture was stirred at room temperature for 24 h. The resulting mixture was concentrated in *vacuo* and further purification was performed by a silica gel column eluted with dichloromethane /methanol to give the optically active products (*S*)-**1a** 1.243 g in 92% yield and 96% ee.  $[\alpha]_D^{20} = +24.40$  (*c* 1.0, MeOH).

A solution of compound (*S*)-**1a** (1.056 g, 3 mmol) in dichloroethane (60 mL) was added DMAP (36.6 mg, 0.3 mmol), Et<sub>3</sub>N (3.036 g, 30 mmol), Ac<sub>2</sub>O (3.063g, 30 mmol). The mixture was stirred at room temperature for 10 h. After the reaction was completed (determined by TLC). The resulting mixture was concentrated in *vacuo* and further purification was performed by a silica gel column eluted with hexane/ethyl acetate to give the optically active products (*S*)-**4a** 1.203 g in 92% yield and 92% ee. To determine the absolute configuration of (*S*)-**4a** (96% ee), firstly, (*S*)-**4a** was upgraded to >99% ee by recrystallization with *n*-hexane/ethyl acetate. Then, *n*-hexane was slowly added into the solution of (*S*)-**4a** in ethyl acetate at 50 °C, then the solution was slowly cooled down to room temperature. The crystal was grown from the solution, which is suitable for X-ray diffraction analysis. The structure in **Figure S1** showed that the absolute configuration of **4a** is (*S*). [CCDC 2100898] contains the structure and supplementary crystallographic data for (*S*)-**4a**. These data can be obtained free of charge from the Cambridge Crystallographic Data Centre *via* [www.ccdc.cam.ac.uk](http://www.ccdc.cam.ac.uk).

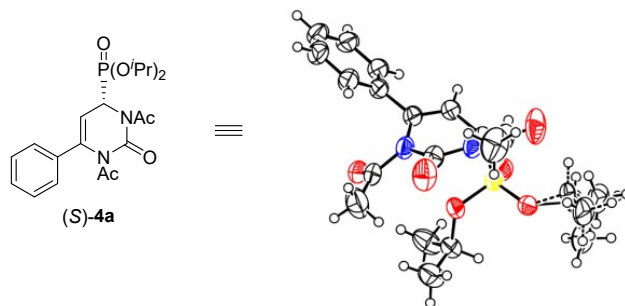

**Figure S1.** X-ray Crystallographic Analysis of (*S*)-**4a** [CCDC 2100898]

ORTEP diagram of compound **4a**, thermal ellipsoids are drawn on 30% probability level

Crystal data and structure refinement for **4a**.

|                                   |                                                                 |
|-----------------------------------|-----------------------------------------------------------------|
| Identification code               | <b>4a</b>                                                       |
| Empirical formula                 | C <sub>20</sub> H <sub>27</sub> N <sub>2</sub> O <sub>6</sub> P |
| Formula weight                    | 422.40                                                          |
| Temperature                       | 190(0) K                                                        |
| Wavelength                        | 1.34139 Å                                                       |
| Crystal system                    | triclinic                                                       |
| Space group                       | P 1                                                             |
| Volume                            | 2756.2(4) Å <sup>3</sup>                                        |
| Z                                 | 5                                                               |
| Density (calculated)              | 1.272 Mg/m <sup>3</sup>                                         |
| Absorption coefficient            | 0.925 mm <sup>-1</sup>                                          |
| F(000)                            | 1120                                                            |
| Crystal size                      | 0.120 x 0.100 x 0.100 mm <sup>3</sup>                           |
| Goodness-of-fit on F <sup>2</sup> | 1.040                                                           |
| Flack                             | 0.049(11)                                                       |

## 5. Control Experiments

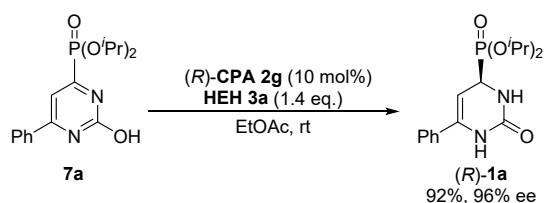

A compound of 2-hydroxypyrimidine **7a** (33.6 mg, 0.10 mmol, 1.0 equiv), chiral phosphoric acid (*R*)-**2g** (7.5 mg, 0.01 mmol, 10 mol%) and Hantzsch ester **3a** (31.5 mg, 0.14 mmol, 1.4 equiv) was added. The mixture was stirred at room temperature for 24 h. The resulting mixture was concentrated in *vacuo* and further purification was performed by a silica gel column chromatography eluted with dichloromethane/methanol to give the optically active product (*R*)-**1a** 31.1 mg in 92% yield and 96% ee. The enantiomeric excess was determined by chiral HPLC.

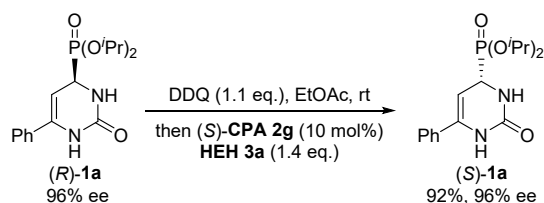

A compound of (*R*)-**1a** (33.8 mg, 0.10 mmol, 1.0 equiv), DDQ (25 mg, 0.11 mmol, 1.1 equiv) in ethyl acetate (4 mL) was stirred at room temperature for 5 min. After the reaction was completed (determined by TLC), chiral phosphoric acid (*S*)-**2g** (7.5 mg, 0.01 mmol, 10 mol%) and Hantzsch ester **3a** (31.5 mg, 0.14 mmol, 1.4 equiv) was added. The mixture was stirred at room temperature for 24 h. The resulting mixture was concentrated in *vacuo* and further purification was performed by a silica gel column chromatography eluted with dichloromethane/methanol to give the optically active product (*S*)-**1a** 31.1 mg in 92% yield and 96% ee. The enantiomeric excess was determined by chiral HPLC.

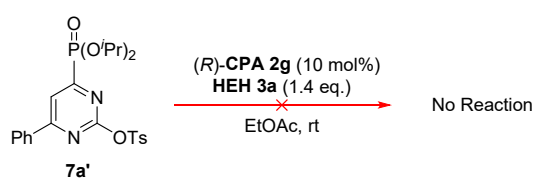

The 4-(diisopropoxyphosphoryl)-6-phenylpyrimidin-2-yl 4-methylbenzenesulfonate **7a'** (0.10 mmol), chiral phosphoric acid (*R*)-**2g** (7.5 mg, 0.01 mmol, 10 mol%) and Hantzsch ester **3a** (31.5 mg, 0.14 mmol, 1.4 equiv) in ethyl acetate (4 mL) was stirred at room temperature for 24 hrs. The reaction was monitored by TLC. The reaction mixture was concentrated in *vacuo* and then tested the crude residue by <sup>1</sup>HNMR to find that starting material **7a'** remained >95% NMR yield.

## 6. Redox Deracemization of 3,4-Dihydropyrimidin-2-ones at Gram Scale

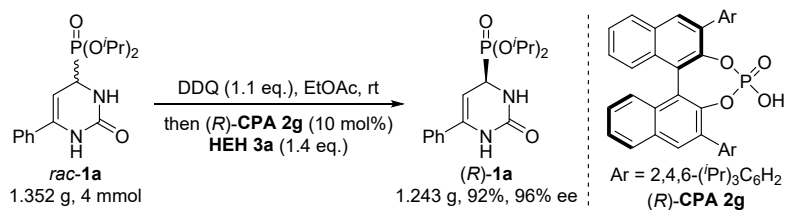

A racemic of 3,4-Dihydropyrimidin-2-one derivatives **1a** (1.352 g, 4.0 mmol, 1.0 equiv), DDQ (0.999 g, 4.4 mmol, 1.1 equiv) in ethyl acetate (50 mL) was stirred at room temperature for 10 min. After the reaction was completed (determined by TLC), chiral phosphoric acid (*R*)-**2g** (0.301 g, 0.4 mmol, 10 mol%) and Hantzsch ester **3a** (1.261 g, 5.6 mmol, 1.4 equiv) was added. The mixture was stirred at room temperature for 24 h. The resulting mixture was concentrated in *vacuo* and further purification was performed by a silica gel column eluted with dichloromethane/methanol to give the optically active products (*R*)-(-)-**1a** 1.243 g in 92% yield and 96% ee. The enantiomeric excesses were determined by chiral HPLC.

## 7. Synthesis of the Optically Active Products 5m and 6m

### 7.1 Synthesis DHPMs Derivative 4m

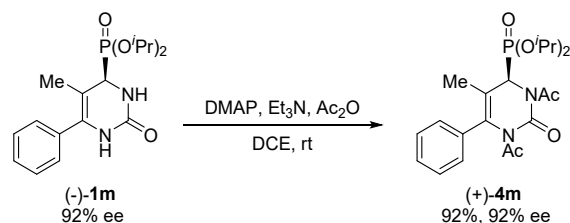

A solution of compound (*R*)-**1m** (0.352 g, 1 mmol) in dichloroethane (20 mL) was added DMAP (12.2 mg, 0.1 mmol), Et<sub>3</sub>N (1.012 g, 10 mmol), Ac<sub>2</sub>O (1.021 g, 10 mmol). The mixture was stirred at room temperature for 10 h. After the reaction was completed (determined by TLC). The resulting mixture was concentrated in *vacuo* and further purification was performed by a silica gel column eluted with hexane/ethyl acetate to give the optically active products (*R*)-**4m** 0.401 g in 92% yield and 92% ee. The enantiomeric excesses were determined by chiral HPLC.

**Diisopropyl (*R*)-(1,3-diacetyl-5-methyl-2-oxo-6-phenyl-1,2,3,4-tetrahydropyrimidin-4-yl) phosphonate (4m):** 401 mg, 92% yield, new compound, white solid, mp: 103-104 °C, *R<sub>f</sub>* = 0.30

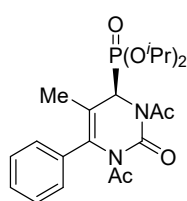

(dichloromethane/methanol = 50/1), 92% ee,  $[\alpha]_D^{20} = +36.30$  (*c* 0.98, MeOH). <sup>1</sup>H NMR (400 MHz, DMSO-*d*<sub>6</sub>)  $\delta$  7.37 (t, *J* = 7.4 Hz, 2H), 7.28 (t, *J* = 8.1 Hz, 3H), 5.26 (d, *J* = 20.0 Hz, 1H), 4.68-4.58 (m, 2H), 2.55 (s, 3H), 2.29 (s, 3H), 1.89 (d, *J* = 2.2 Hz, 3H), 1.30-1.20 (m, 12H). <sup>13</sup>C NMR (100 MHz, DMSO-*d*<sub>6</sub>)  $\delta$  170.9 (d, *J* = 1.6 Hz), 169.6 (d, *J* = 2.0 Hz), 153.3, 136.0 (d, *J* = 3.3 Hz), 135.5 (d, *J* = 9.0 Hz), 128.4, 128.2, 127.9, 120.7 (d, *J* = 1.4 Hz), 72.4 (d, *J* = 7.3 Hz), 71.9 (d, *J* = 7.3 Hz), 52.9 (d, *J* = 155.9 Hz), 26.4, 26.1, 24.3 (d, *J* = 3.5 Hz), 24.1 (d, *J* = 4.0 Hz), 23.9 (d, *J* = 3.0 Hz), 23.8 (d, *J* = 2.0 Hz), 18.0 (d, *J* = 4.9 Hz). <sup>31</sup>P NMR (162 MHz, DMSO-*d*<sub>6</sub>)  $\delta$  16.7. HPLC: Chiracel AD column, 254 nm, 30 °C, *n*-hexane/*i*-propanol = 80/20, flow = 1.0 mL/min, retention time 4.1 min (maj) and 4.8 min. HRMS (ESI) *m/z* Calculated for C<sub>21</sub>H<sub>30</sub>N<sub>2</sub>O<sub>6</sub>P [M+H]<sup>+</sup> 437.1836, found 437.1837.

### 7.2 Synthesis DHPMs Derivative 5m

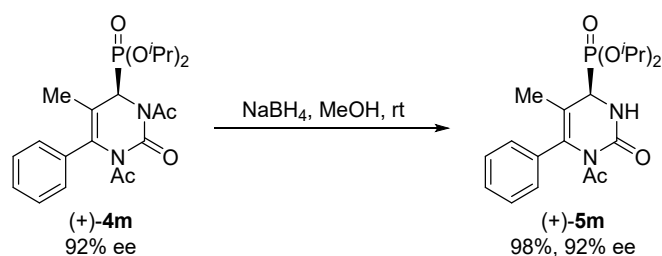

A solution of compound (*R*)-**4m** (43.6 mg, 0.10 mmol) in methanol (2.0 mL) was added sodium borohydride (15.1 mg, 0.40 mmol). The resulting solution was stirred at room temperature for 0.5 h. After the reaction was completed (determined by TLC). Methanol was removed in *vacuo* and the residue was diluted with water. The aqueous mixture was extracted with dichloromethane (10

mL×3). The combined organic layer was washed twice with brine, dried over anhydrous sodium sulfate, and concentrated under reduced pressure to give viscous oil. The crude product was purified by flash column chromatography using dichloromethane/methanol as eluent to give the desired products (+)-**5m** 38.9 mg in 98% yield and 92% ee.

**Diisopropyl (R)-(1-acetyl-5-methyl-2-oxo-6-phenyl-1,2,3,4-tetrahydropyrimidin-4-yl)phosphonate (5m):** 38.9 mg, 98% yield, new compound, white solid, mp: 181-182 °C,  $R_f = 0.30$

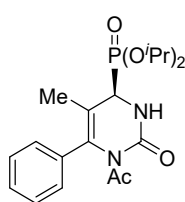

(hexanes/ethyl acetate = 20/1), 92% ee,  $[\alpha]_D^{20} = +86.73$  ( $c$  1.74, MeOH).  $^1\text{H}$  NMR (400 MHz, DMSO- $d_6$ )  $\delta$  8.64 (d,  $J = 5.3$  Hz, 1H), 7.34 (t,  $J = 7.4$  Hz, 2H), 7.24 (t,  $J = 7.2$  Hz, 1H), 7.16 (d,  $J = 7.5$  Hz, 2H), 4.67-4.62 (m, 2H), 4.01-3.96 (m, 1H), 2.21 (s, 3H), 1.85 (d,  $J = 2.1$  Hz, 3H), 1.32-1.25 (m, 12H).  $^{13}\text{C}$  NMR (100 MHz, DMSO- $d_6$ )  $\delta$  168.4 (d,  $J = 2.4$  Hz), 154.7, 137.1 (d,  $J = 3.5$  Hz), 135.7 (d,  $J = 9.4$  Hz), 128.3, 128.0 (d,  $J = 1.2$  Hz), 127.5, 120.0 (d,  $J = 1.2$  Hz), 71.5 (d,  $J = 7.4$  Hz), 71.3 (d,  $J = 7.5$  Hz), 54.0 (d,  $J = 153.6$  Hz), 25.7, 24.2 (d,  $J = 3.7$  Hz), 24.1, 24.1 (d,  $J = 1.5$  Hz), 24.0 (d,  $J = 4.3$  Hz), 17.7 (d,  $J = 4.2$  Hz).  $^{31}\text{P}$  NMR (162 MHz, DMSO- $d_6$ )  $\delta$  18.2. HPLC: Chiracel AD column, 254 nm, 30 °C, *n*-hexane/*i*-propanol = 90/10, flow = 1.0 mL/min, retention time 16.0 min (maj) and 18.0 min. HRMS (ESI)  $m/z$  Calculated for  $\text{C}_{19}\text{H}_{28}\text{N}_2\text{O}_5\text{P}$   $[\text{M}+\text{H}]^+$  395.1729, found 395.1728.

### 7.3 Synthesis DHPMs Derivative 6m

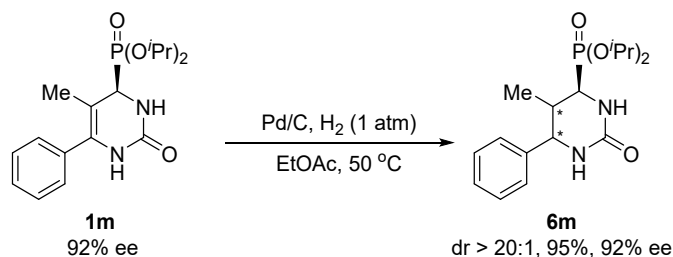

A mixture of compound (*R*)-**1m** (70.4 mg, 0.20 mmol) in ethyl acetate (5.0 mL) was added Pd/C (47.3 mg, 0.01mmol, 5 mol%) in a Schlenk tube. The Schlenk tube was carefully and quickly vacuum purged before being filled with hydrogen using a hydrogen balloon. The reaction mixture was then stirred at 50 °C until the the reaction was completed (determined by TLC). Ethyl acetate was removed in vacuo and further purification was performed by a silica gel column eluted with dichloromethane /methanol to give the optically active products (+)-**6m** 67.3 mg in 95% yield and 92% ee. The enantiomeric excesses were determined by chiral HPLC.

**Diisopropyl ((R)-5-methyl-2-oxo-6-phenylhexahydropyrimidin-4-yl)phosphonate (6m):** 67.3 mg, 95% yield, new compound, colorless liquid,  $R_f = 0.30$  (methanol/dichloromethane = 20/1),

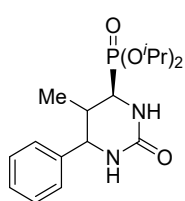

92% ee,  $[\alpha]_D^{20} = +73.11$  ( $c$  0.70, MeOH).  $^1\text{H}$  NMR (400 MHz,  $\text{CDCl}_3$ )  $\delta$  7.38 (t,  $J = 7.3$  Hz, 2H), 7.33-7.26 (m, 3H), 5.27 (s, 1H), 5.00 (d,  $J = 7.9$  Hz, 1H), 4.82-4.72 (m, 3H), 4.04 (dd,  $J = 14.2, 2.8$  Hz, 1H), 2.42 (d,  $J = 3.3$  Hz, 1H), 1.38-1.34 (m, 12H), 0.89 (d,  $J = 6.9$  Hz, 2H).  $^{13}\text{C}$  NMR (100 MHz,  $\text{CDCl}_3$ )  $\delta$  156.3 (d,  $J = 11.9$  Hz), 138.9 (d,  $J = 3.7$  Hz), 128.7 (s), 128.0 (s), 126.3 (s), 71.9 (d,  $J = 6.8$  Hz), 71.6 (d,  $J = 7.5$  Hz), 60.2 (d,  $J = 18.8$  Hz), 53.6 (d,  $J = 159.1$  Hz), 32.9 (d,  $J = 4.4$

Hz), 24.2 (d,  $J = 3.6$  Hz), 24.1 (d,  $J = 5.0$  Hz), 24.0 (d,  $J = 3.6$  Hz), 23.9 (d,  $J = 5.7$  Hz), 7.6 (d,  $J = 1.9$  Hz).  $^{31}\text{P}$  NMR (162 MHz,  $\text{CDCl}_3$ )  $\delta$  18.5. HPLC: Chiracel AD column, 254 nm, 30 °C, *n*-hexane/*i*-propanol = 80/20, flow = 1.0 mL/min, retention time 7.9 min and 10.7 min (maj). HRMS (ESI)  $m/z$  Calculated for  $\text{C}_{17}\text{H}_{28}\text{N}_2\text{O}_4\text{P}$   $[\text{M}+\text{H}]^+$  355.1787, found 355.1788.

## 8. References

1. G.-S. Feng, M.-W. Chen, L. Shi and Y.-G. Zhou, *Angew. Chem. Int. Ed.*, 2018, **57**, 5853.
2. K.-R. Li, F.-J. Meng, W.-F. Jiang and L. Shi, *Tetrahedron Lett.* **2021**, *73*, 153149.



## 9. Copy of NMR, HPLC for Compounds

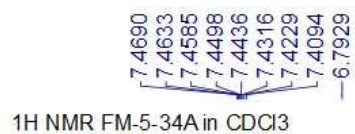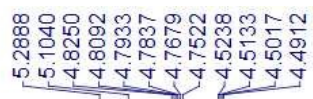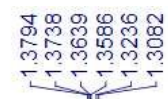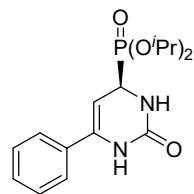

**1a** <sup>1</sup>H NMR (400 MHz, CDCl<sub>3</sub>)

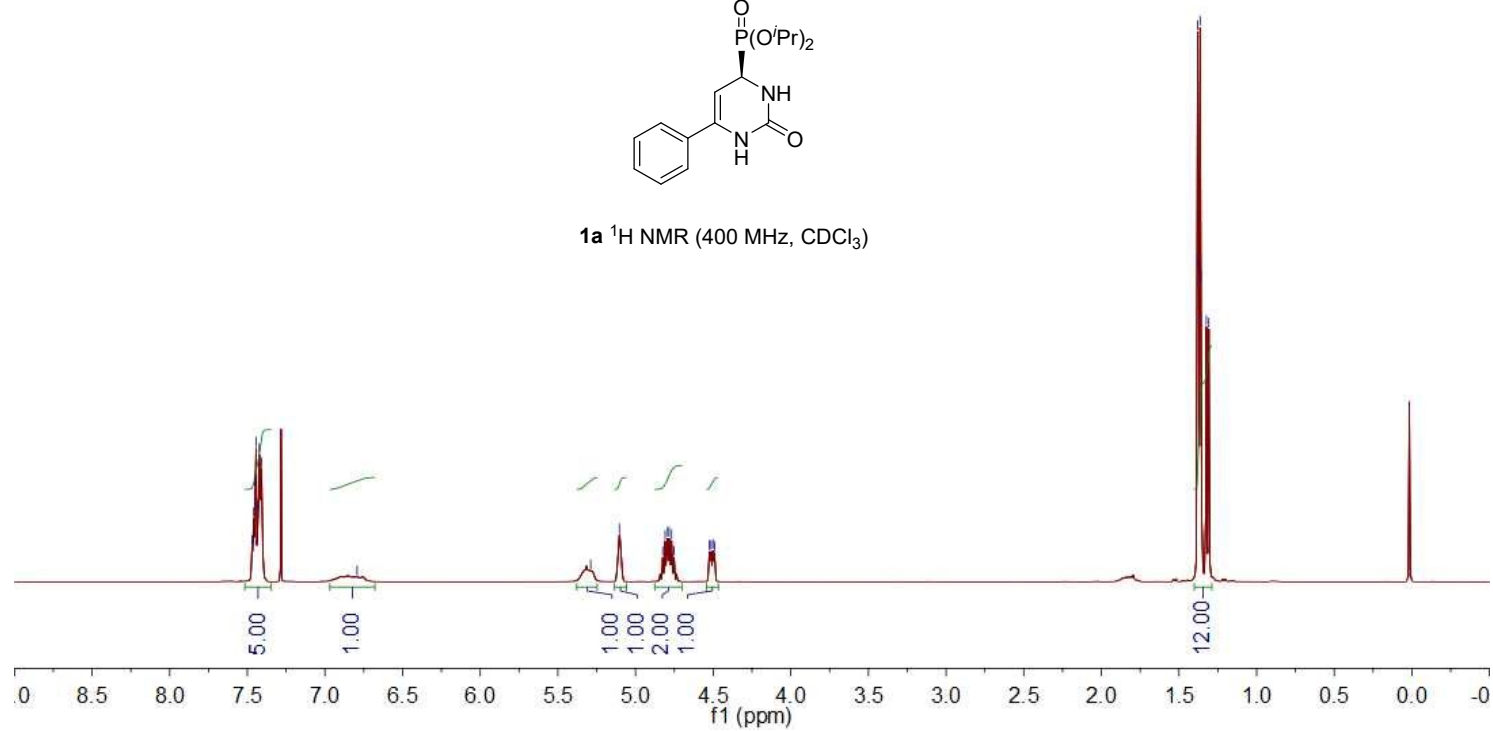

13C NMR FM-5-34A in CDCl3

153.81

138.32

134.06

134.03

129.29

128.83

125.11

90.75

90.66

72.19

72.12

71.86

71.78

52.58

50.99

24.28

24.24

24.13

24.10

24.06

23.92

23.87

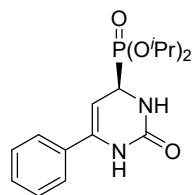

**1a** <sup>13</sup>C NMR (100 MHz, CDCl<sub>3</sub>)

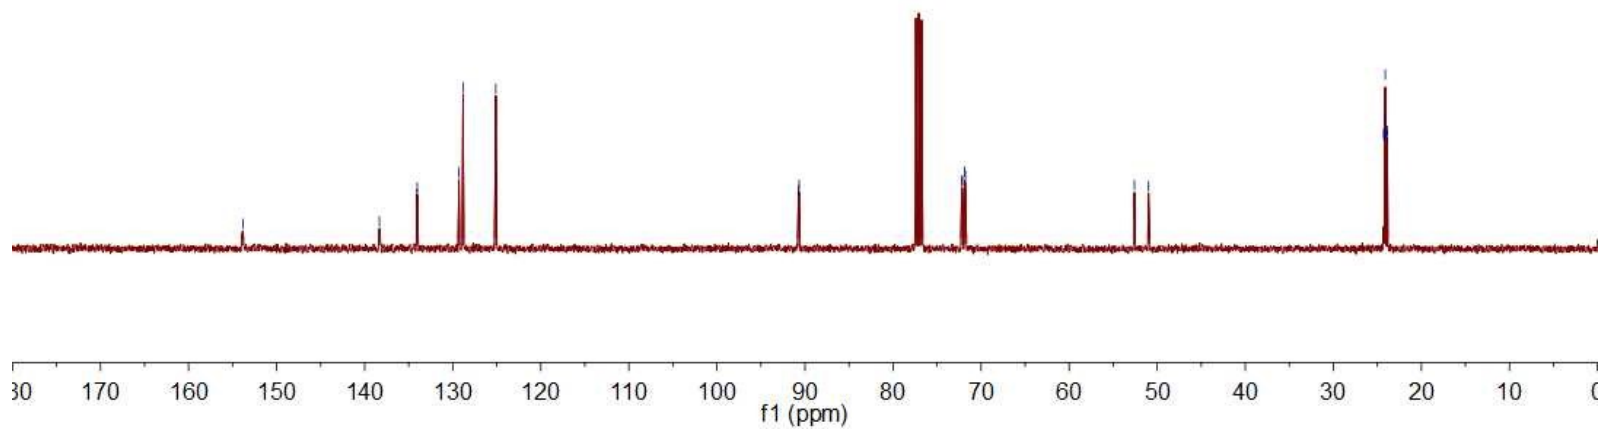

31P NMR FM-5-34A in CDCl3

—16.01

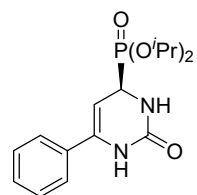

**1a** <sup>31</sup>P NMR (162 MHz, CDCl<sub>3</sub>)

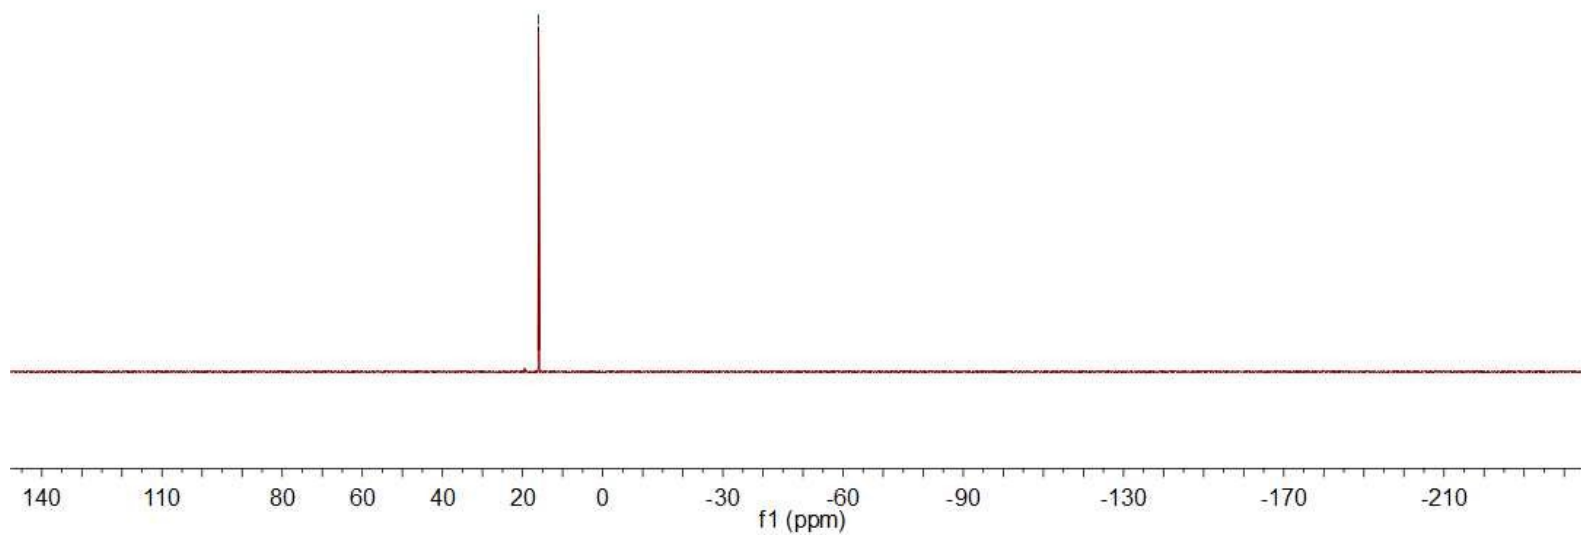

1H NMR FM-5-34B in CDCl3

7.6403  
7.3578  
7.3376  
7.1923  
7.1721

5.7360  
5.0342  
5.0279  
5.0234  
5.0188  
5.0126  
4.7823  
4.7666  
4.7605  
4.7493  
4.7448  
4.7336  
4.7281  
4.4468  
4.4427  
4.4362  
4.4320  
4.4258  
4.4216  
4.4151

1.3469  
1.3315  
1.3197  
1.2811  
1.2656

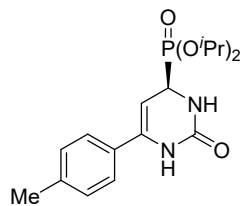

1b <sup>1</sup>H NMR (400 MHz, CDCl<sub>3</sub>)

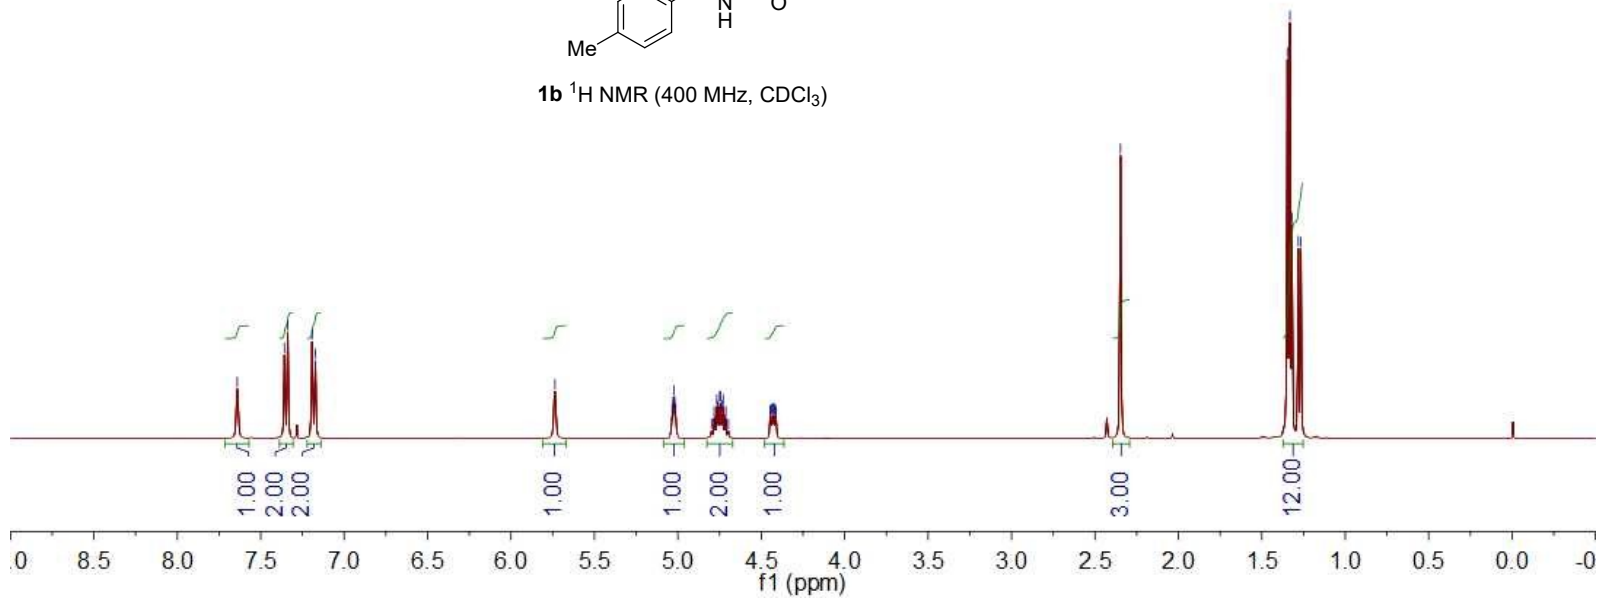

<sup>13</sup>C NMR FM-5-34B in CDCl<sub>3</sub>

154.08  
139.29  
138.31  
138.20  
131.20  
131.17  
129.46  
125.01  
124.99

89.86  
89.77

72.19  
72.12  
71.75  
71.67

52.49  
50.89

24.31  
24.28  
24.11  
24.08  
23.89  
23.84  
21.25

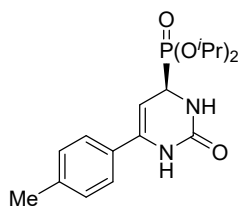

**1b** <sup>13</sup>C NMR (100 MHz, CDCl<sub>3</sub>)

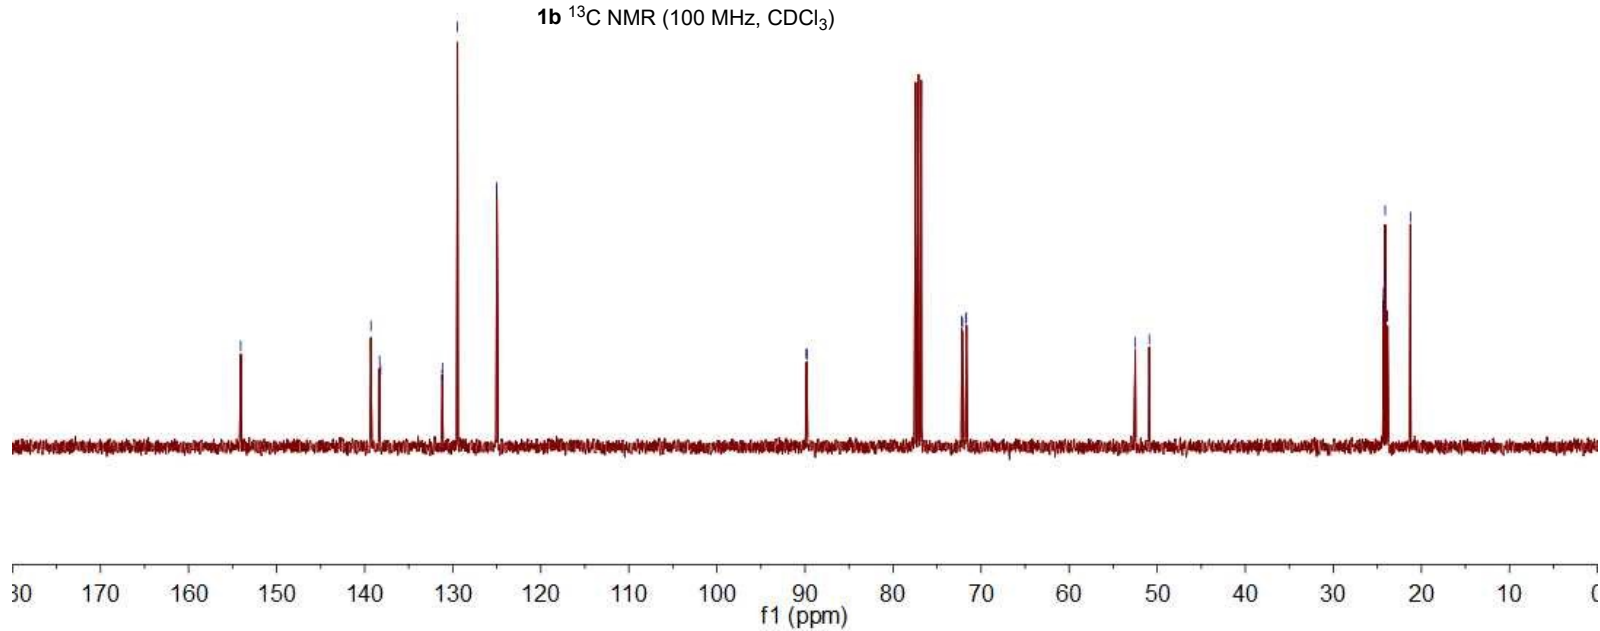

31P NMR FM-5-34B in CDCl3

-16.17

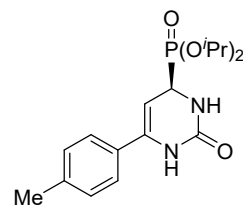

**1b** <sup>31</sup>P NMR (162 MHz, CDCl<sub>3</sub>)

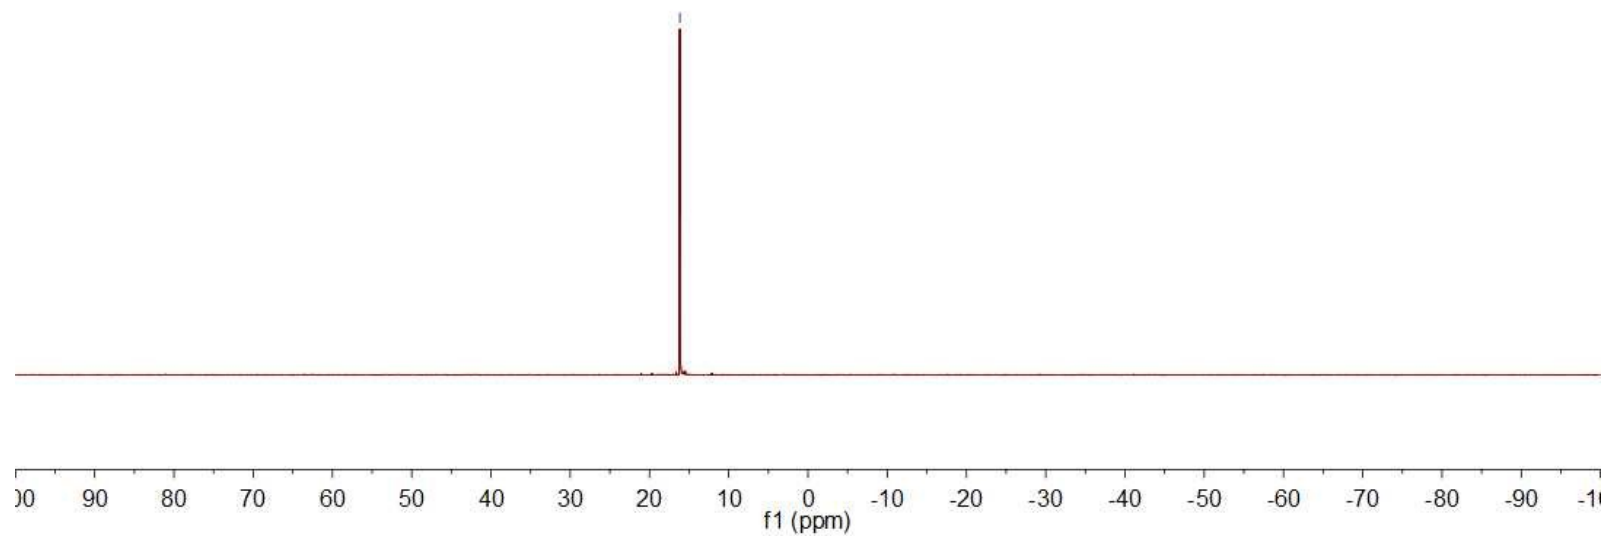

<sup>1</sup>H NMR FM-5-34C in CDCl<sub>3</sub>

7.5287  
7.2907  
7.2839  
7.2656  
7.2537  
7.2386  
7.1833  
7.1686

5.7488  
5.0489  
4.8067  
4.7908  
4.7736  
4.7571  
4.7400  
4.7240  
4.7080  
4.4469  
4.4372

2.3673

1.3526  
1.3391  
1.2942  
1.2788

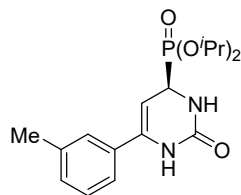

**1c** <sup>1</sup>H NMR (400 MHz, CDCl<sub>3</sub>)

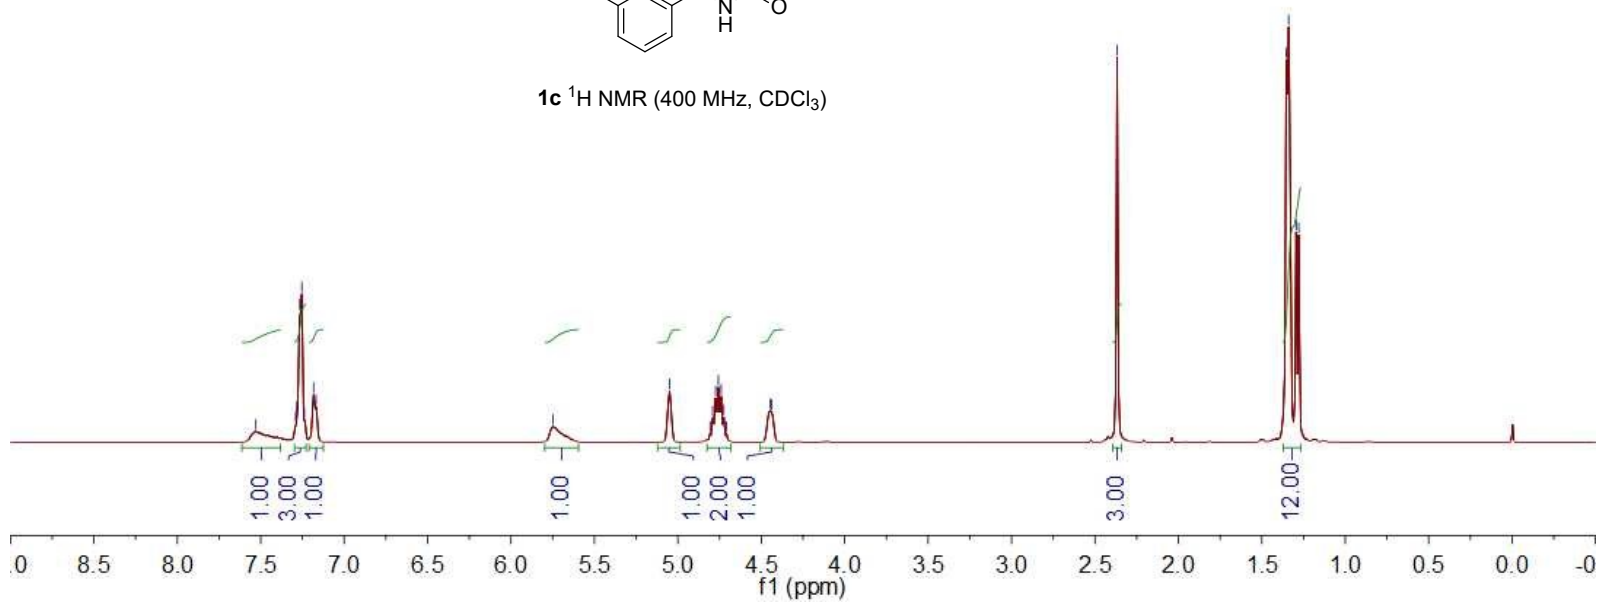

13C NMR FM-5-34C in CDCl3

153.99

138.51

133.94

130.02

128.68

125.80

122.18

90.43

90.36

72.18

71.80

52.51

50.92

24.30

24.27

24.12

23.92

23.87

21.43

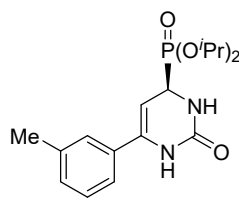

1c <sup>13</sup>C NMR (100 MHz, CDCl<sub>3</sub>)

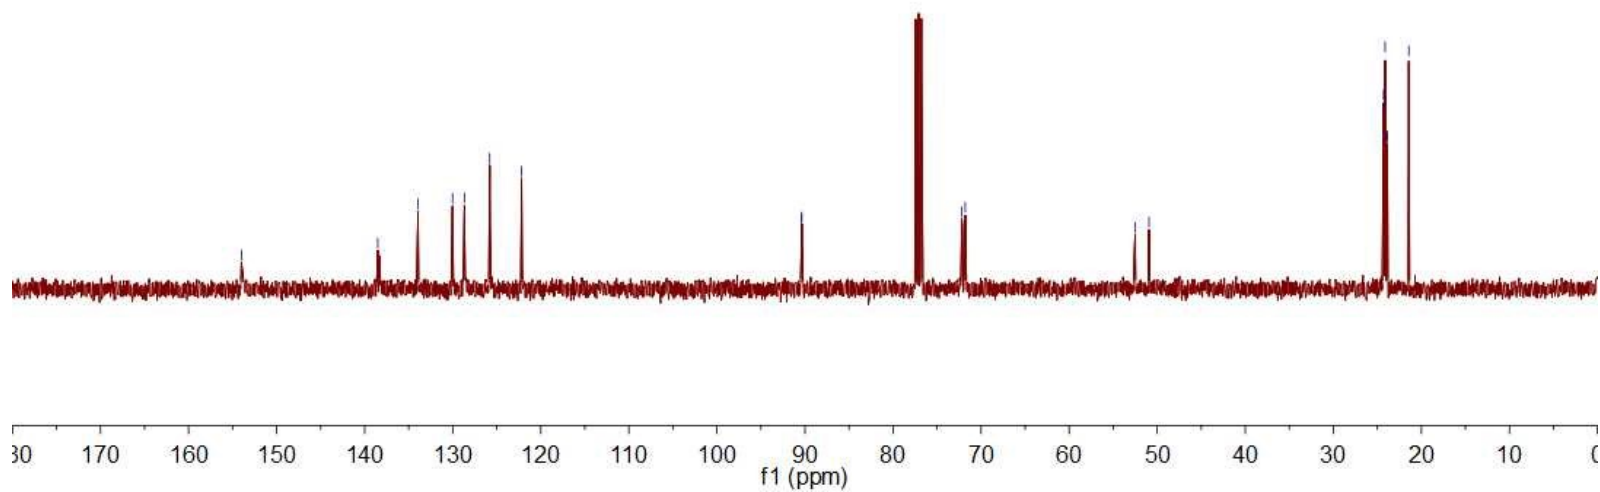



31P NMR FM-5-34C in CDCl3

-16.14

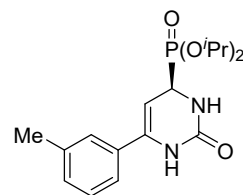

**1c** <sup>31</sup>P NMR (162 MHz, CDCl<sub>3</sub>)

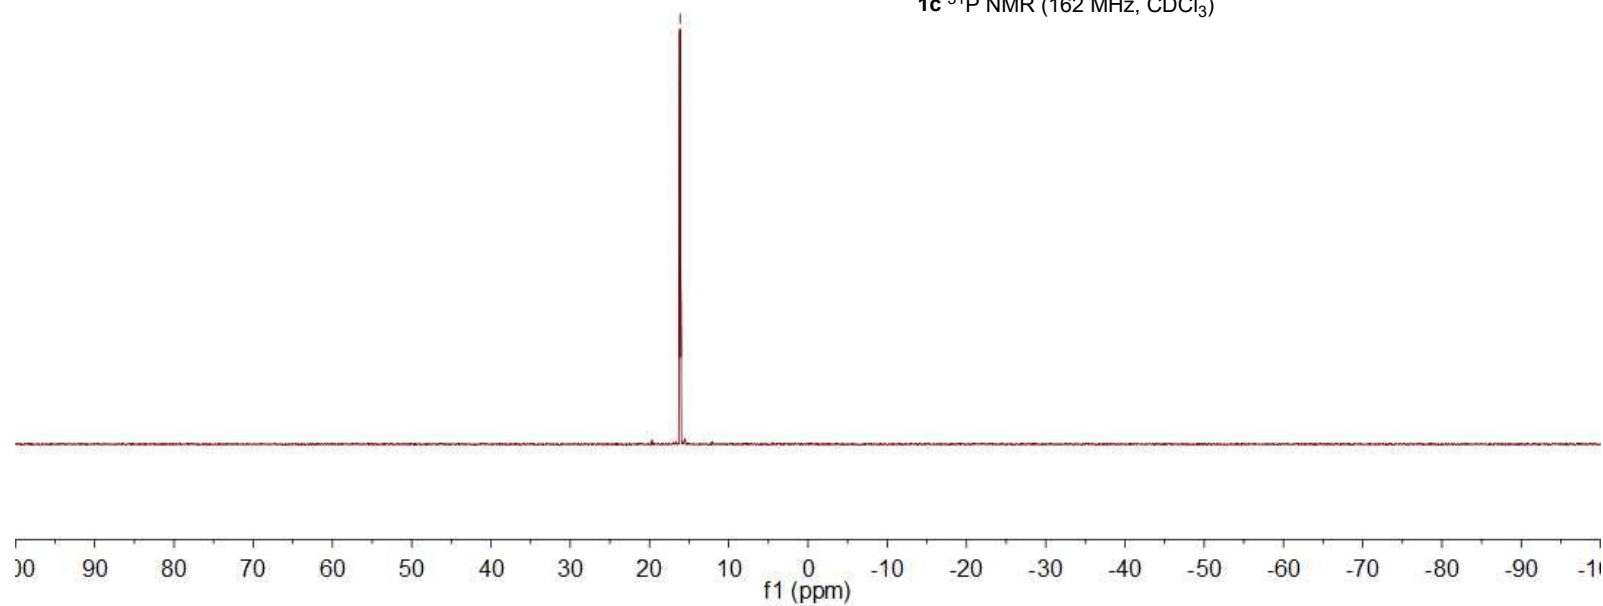

<sup>1</sup>H NMR FM-5-34D in CDCl<sub>3</sub>

7.2201  
7.1741  
7.1720  
6.6927  
5.2763  
5.0764  
5.0703  
5.0657  
5.0610  
5.0550  
4.8333  
4.8177  
4.8019  
4.7970  
4.7845  
4.7812  
4.7686  
4.7642  
4.7482  
4.7326  
4.5064  
4.4958  
4.4877  
4.4851  
4.4774  
2.2973  
2.2909  
1.3766  
1.3704  
1.3612  
1.3551  
1.3134  
1.2979

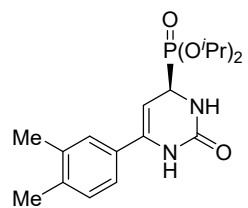

**1d** <sup>1</sup>H NMR (400 MHz, CDCl<sub>3</sub>)

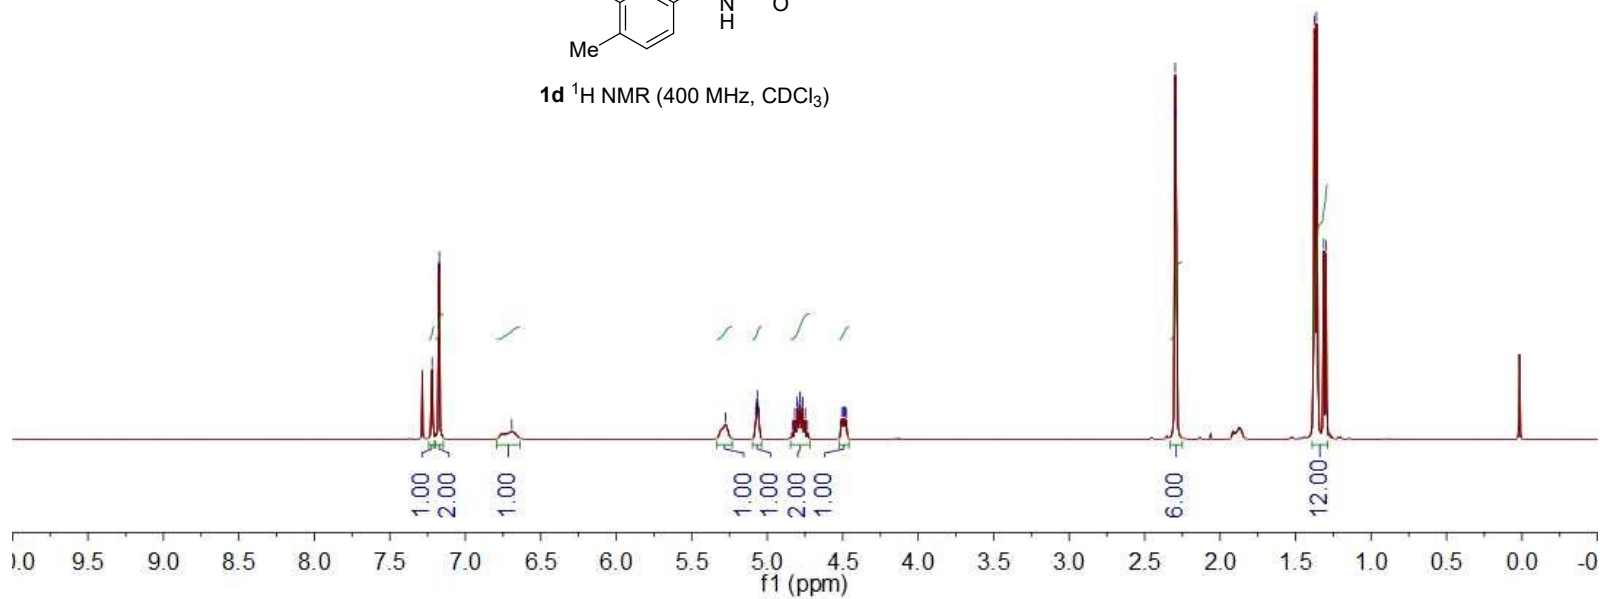

<sup>13</sup>C NMR FM-5-34D in CDCl<sub>3</sub>

154.05  
 138.31  
 138.21  
 137.99  
 137.06  
 131.56  
 131.53  
 129.98  
 126.24  
 122.42  
 89.63  
 89.54  
 72.19  
 72.12  
 71.72  
 71.65  
 52.48  
 50.89  
 24.31  
 24.28  
 24.11  
 24.07  
 23.90  
 23.85  
 19.82  
 19.57

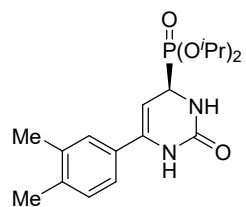

**1d** <sup>13</sup>C NMR (100 MHz, CDCl<sub>3</sub>)

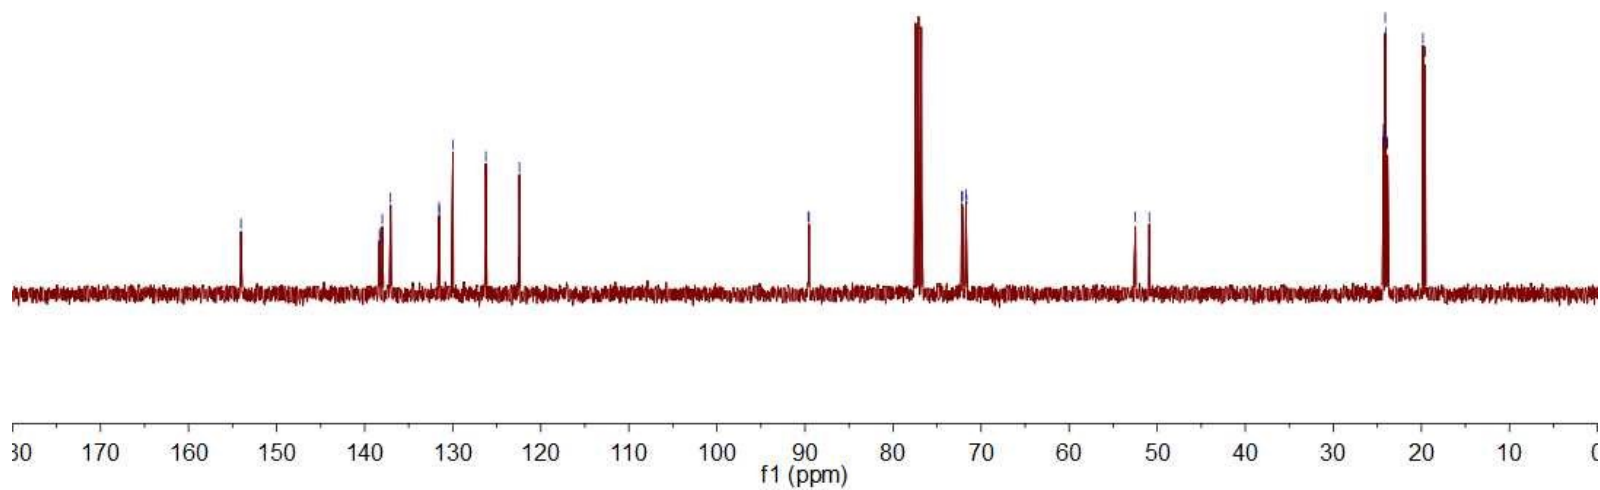

31P NMR FM-5-34D in CDCl3

—16.20

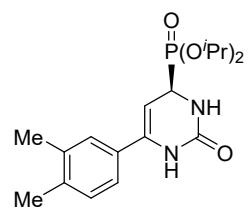

**1d** <sup>31</sup>P NMR (162 MHz, CDCl<sub>3</sub>)

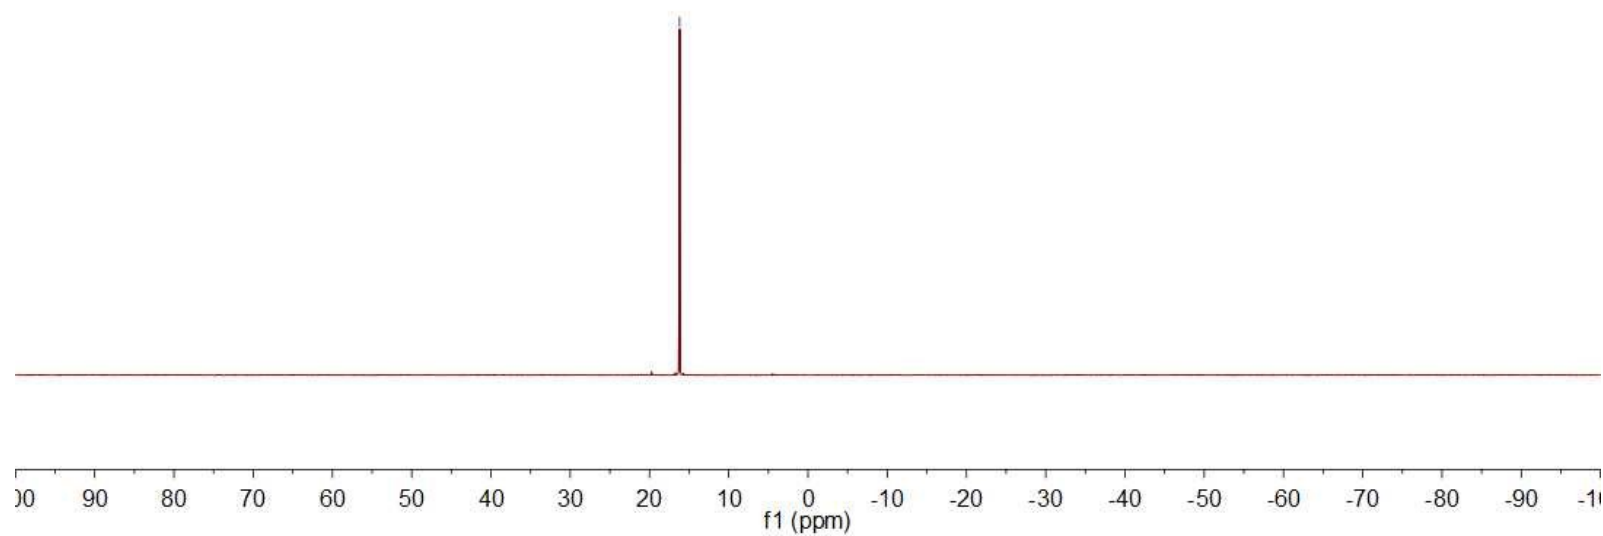

<sup>1</sup>H NMR FM-5-34E in CDCl<sub>3</sub>

7.5236  
7.3925  
7.3719  
7.2493  
7.2286

5.6946  
5.0464  
5.0358  
5.0313  
4.7762  
4.7666  
4.7605  
4.7510  
4.7441  
4.7353  
4.4775  
4.4669  
4.4564  
4.4528  
2.9276  
2.9103  
2.8930  
2.8758

1.3503  
1.3352  
1.3236  
1.2934  
1.2779  
1.2544  
1.2371

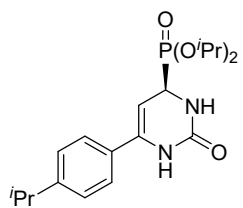

**1e** <sup>1</sup>H NMR (400 MHz, CDCl<sub>3</sub>)

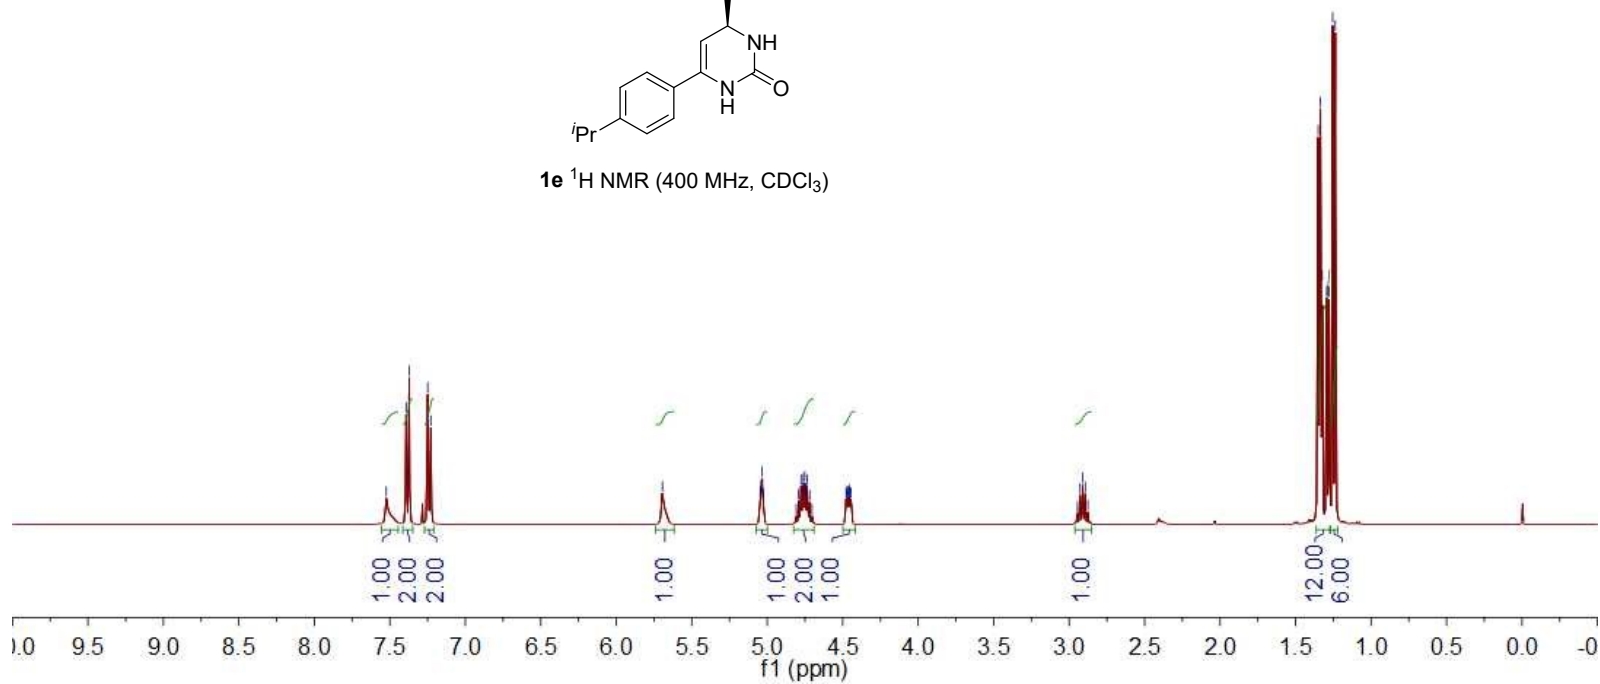

$^{13}\text{C}$  NMR FM-5-34E in  $\text{CDCl}_3$   
 153.99, 150.18, 138.25, 138.14, 131.54, 131.50, 126.87, 125.06, 125.04, 89.97, 89.88, 72.16, 72.09, 71.79, 71.71, 52.54, 50.94, 33.88, 24.29, 24.25, 24.13, 24.10, 24.06, 23.93, 23.88, 23.82

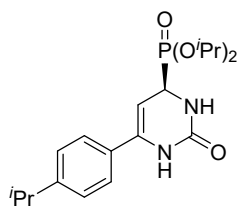

**1e**  $^{13}\text{C}$  NMR (100 MHz,  $\text{CDCl}_3$ )

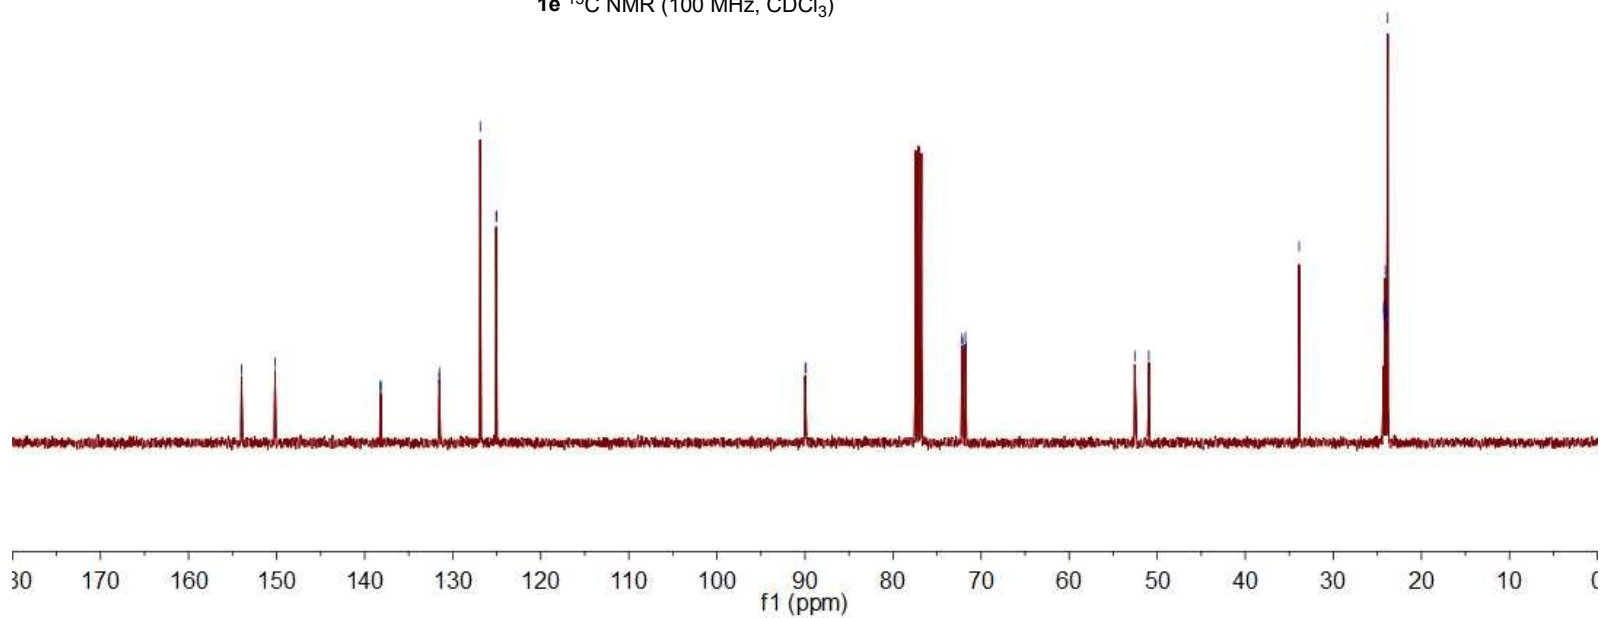

31P NMR FM-5-34E in CDCl3

-16.16

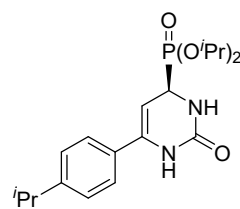

**1e** <sup>31</sup>P NMR (162 MHz, CDCl<sub>3</sub>)

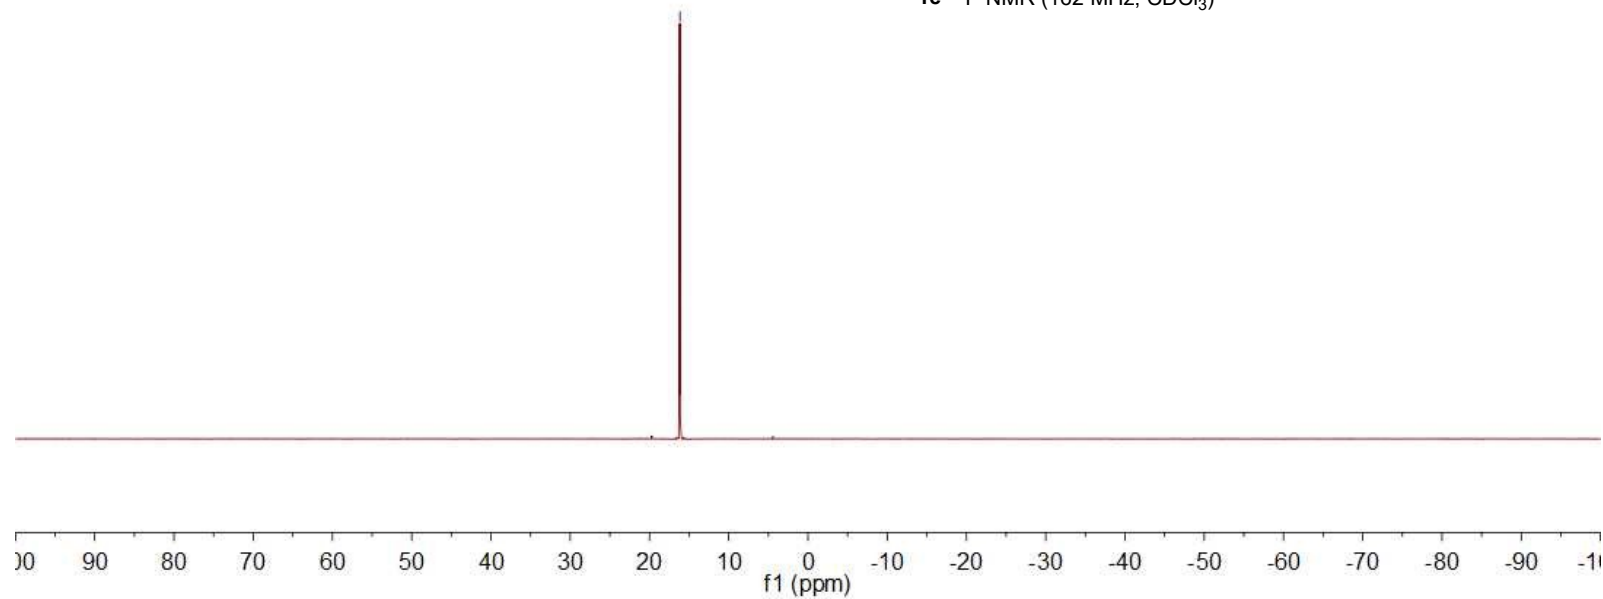

<sup>1</sup>H NMR FM-5-34F in CDCl<sub>3</sub>

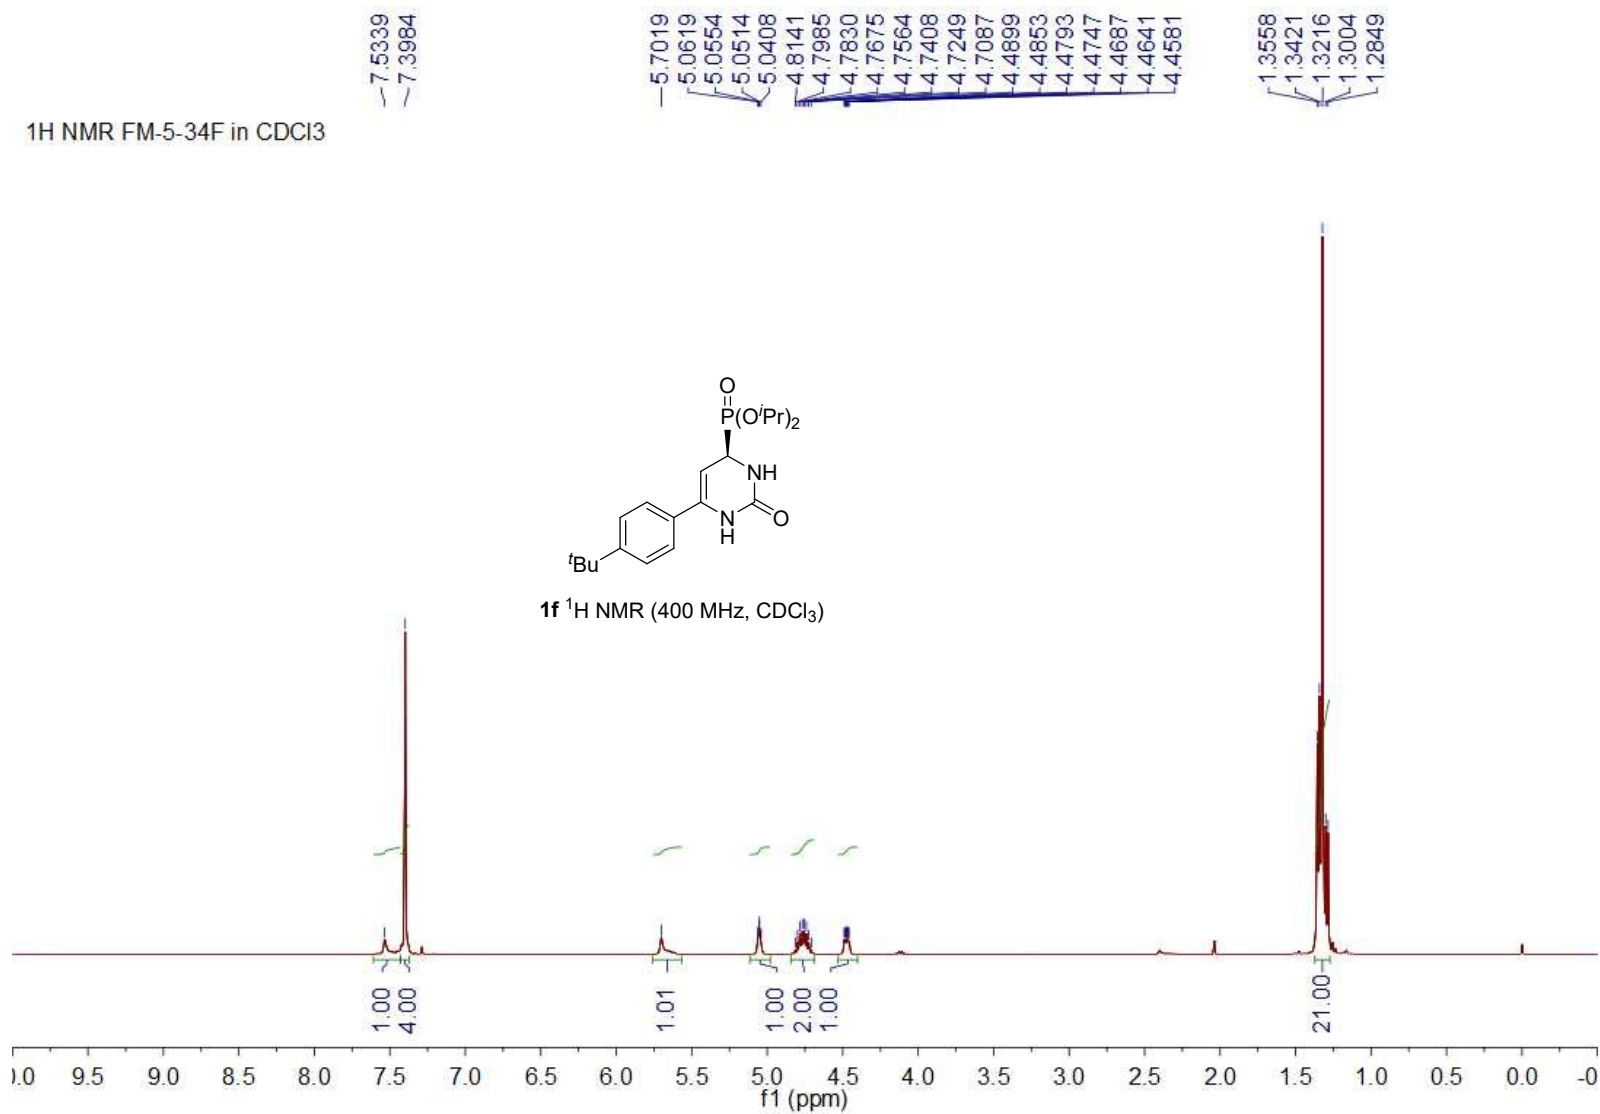



$\sim$ 154.01  
 $\sim$ 152.43  
 $\sim$ 138.15  
 $\sim$ 138.04  
 $\sim$ 131.11  
 $\sim$ 125.73  
 $\sim$ 124.75  
 $\sim$ 90.01  
 $\sim$ 89.92  
 $\sim$ 72.16  
 $\sim$ 72.08  
 $\sim$ 71.80  
 $\sim$ 71.72  
 $\sim$ 52.55  
 $\sim$ 50.95  
 $\sim$ 34.69  
 $\sim$ 31.20  
 $\sim$ 24.28  
 $\sim$ 24.25  
 $\sim$ 24.13  
 $\sim$ 24.10  
 $\sim$ 24.05  
 $\sim$ 23.94  
 $\sim$ 23.89

$^{13}\text{C}$  NMR FM-5-34F in  $\text{CDCl}_3$

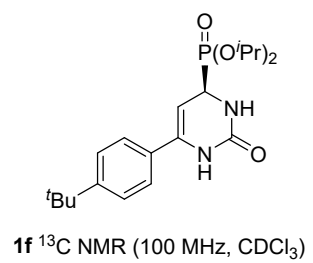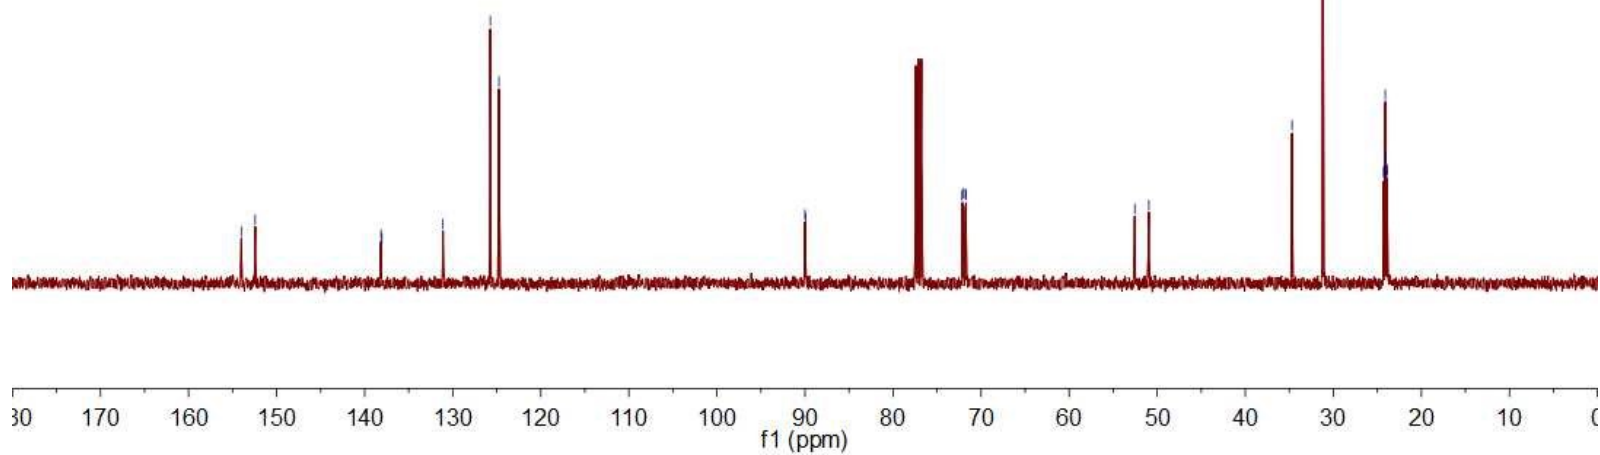

31P NMR FM-5-34F in CDCl3

-16.14

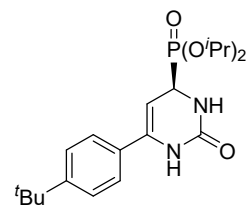

1f <sup>31</sup>P NMR (162 MHz, CDCl<sub>3</sub>)

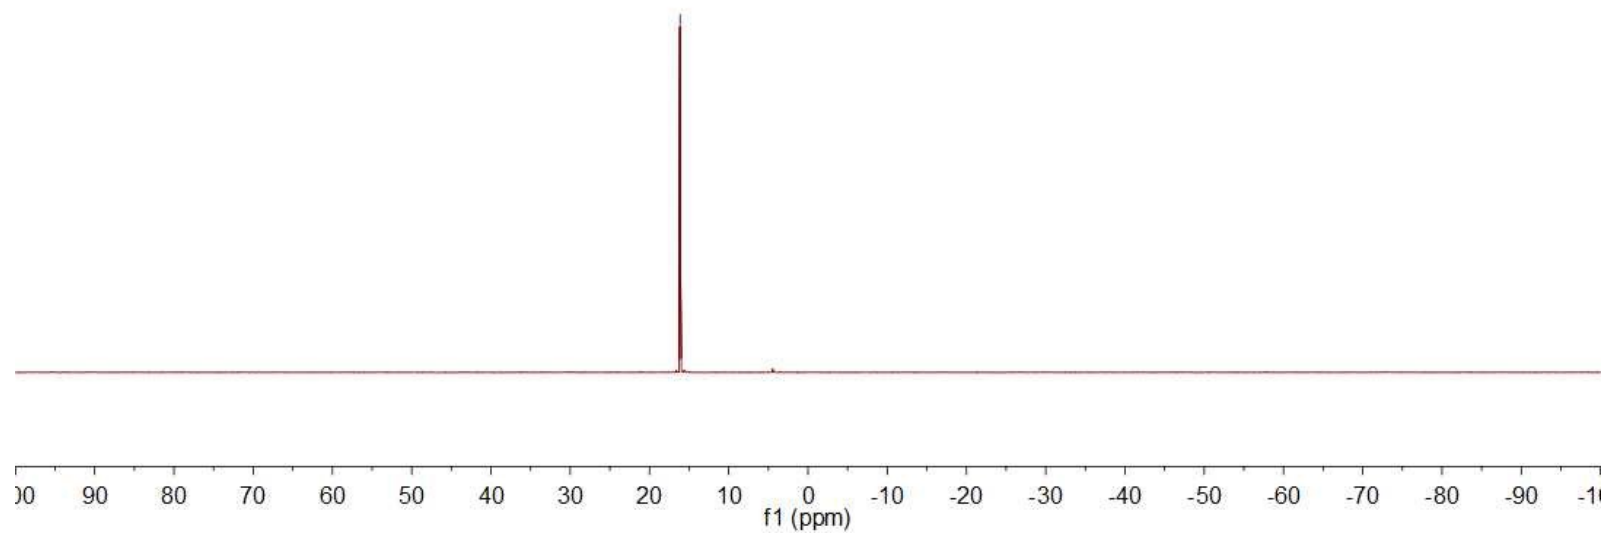

1H NMR FM-5-34G in DMSO

8.6433  
7.5235  
7.5020  
7.4639  
7.4589  
7.4469  
7.4422  
6.9539

4.9978  
4.9877  
4.9852  
4.9753  
4.6486  
4.6332  
4.6177  
4.6023  
4.5869  
4.5715  
4.5561  
4.3434  
4.3358  
4.3307  
4.3226  
4.3202  
4.3122  
4.3071  
4.2995

1.2818  
1.2718  
1.2664  
1.2566  
1.2297  
1.2143

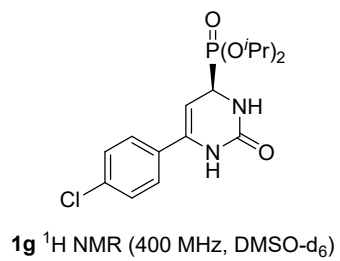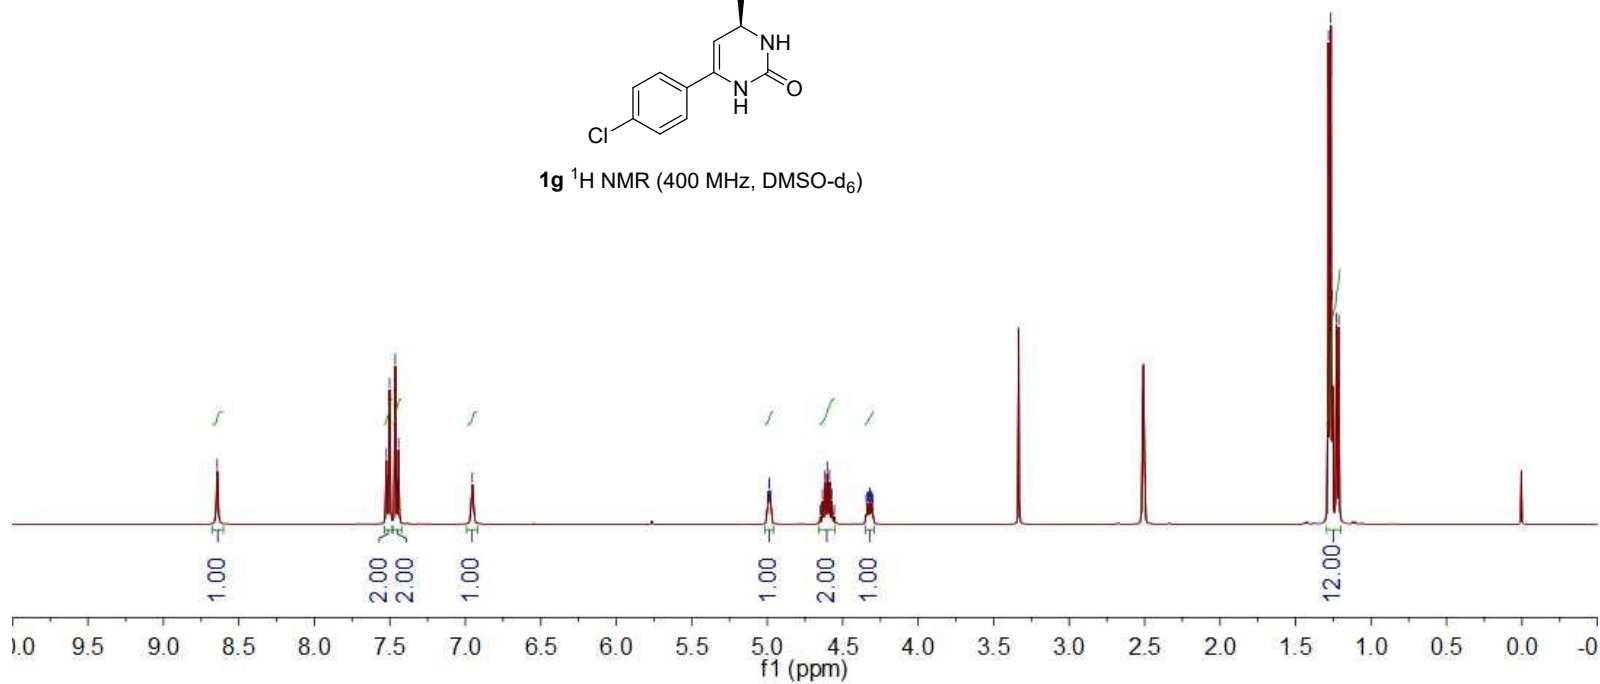

13C NMR FM-5-34G in DMSO

153.65

138.09

138.00

133.77

133.25

133.21

128.95

127.65

127.63

91.91

91.83

71.48

71.41

71.28

71.20

51.73

50.16

24.49

24.46

24.38

24.34

24.25

24.21

24.10

24.05

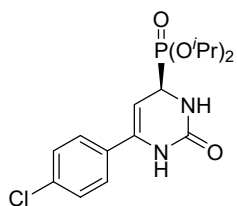

**1g** <sup>13</sup>C NMR (100 MHz, DMSO-d<sub>6</sub>)

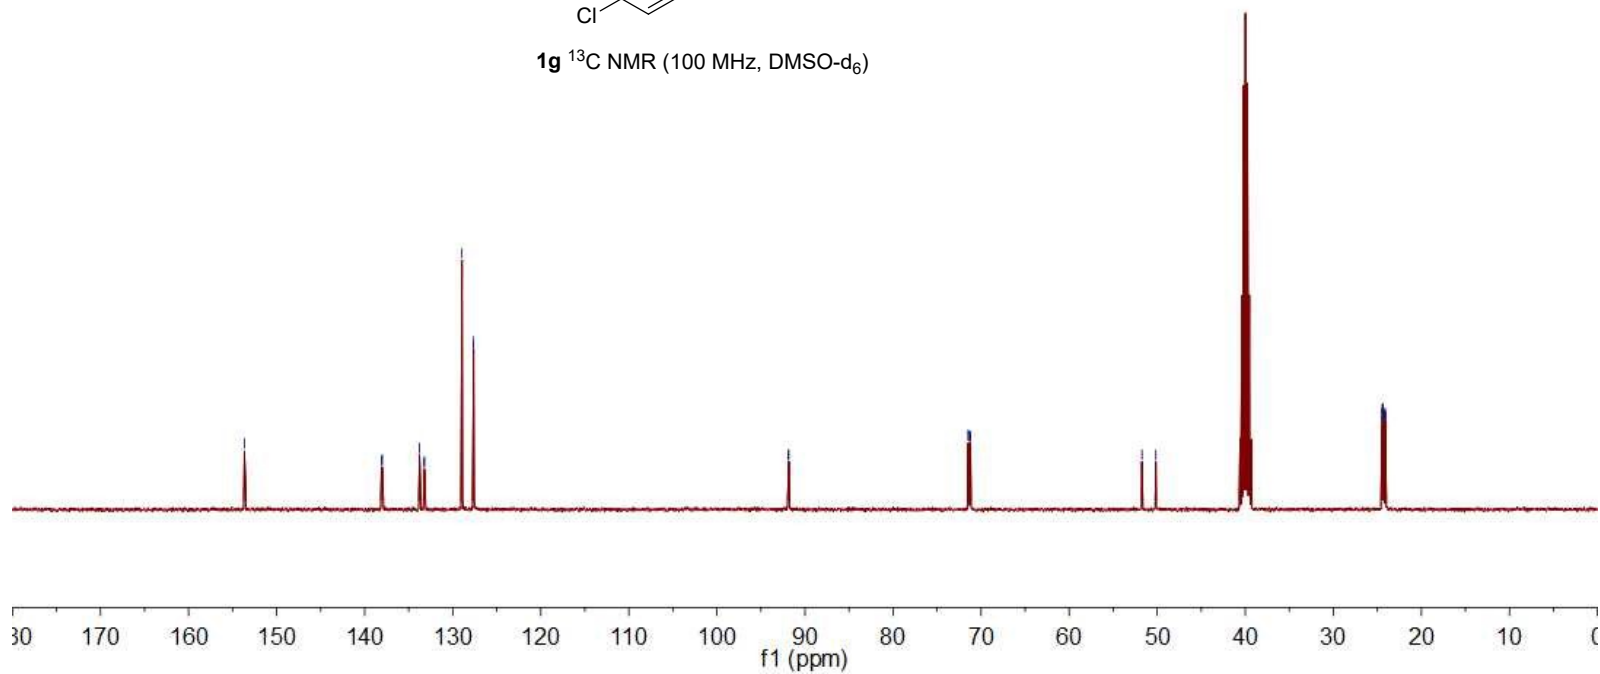

31P NMR FM-5-34G in DMSO

-17.37

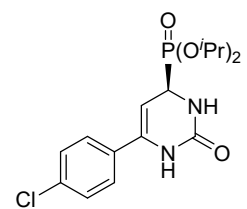

**1g** <sup>31</sup>P NMR (162 MHz, DMSO-d<sub>6</sub>)

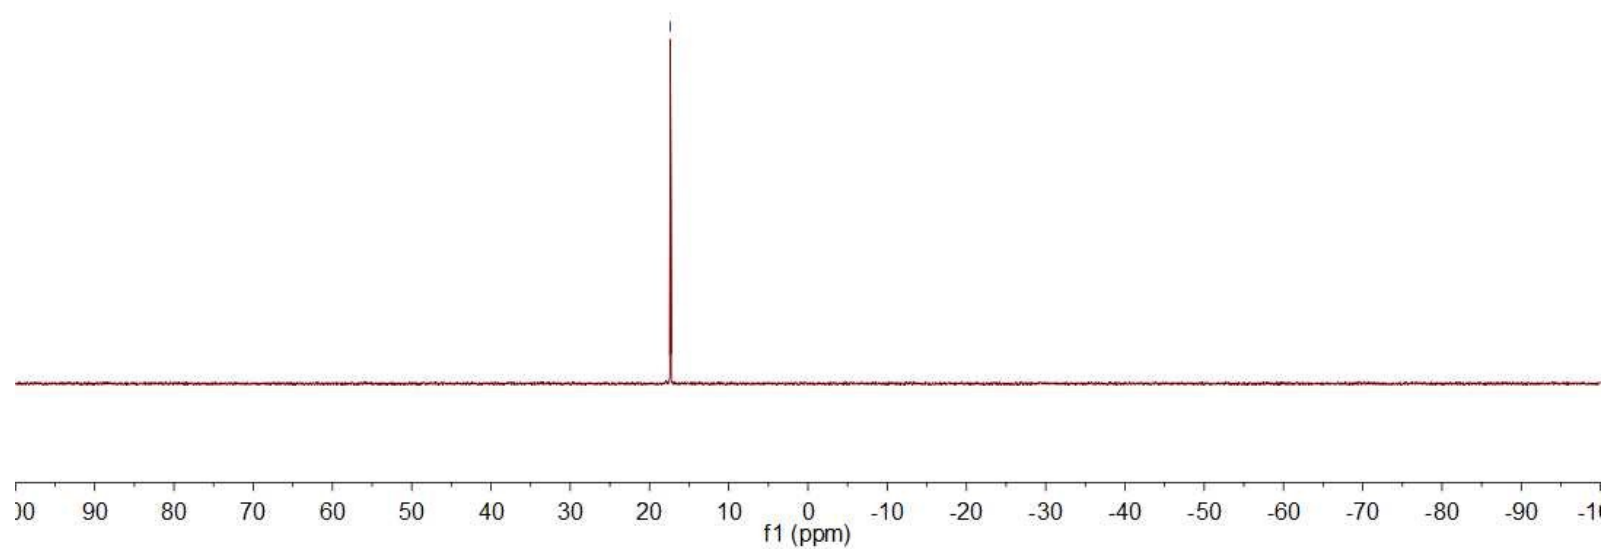

1H NMR FM-5-34H in CDCl<sub>3</sub>

8.1975

7.4427  
7.3279  
7.3100

5.8816

5.0479  
4.7889  
4.7735  
4.7581  
4.7428  
4.7275  
4.7122  
4.4541  
4.4492  
4.4363

1.3414  
1.3269  
1.2898  
1.2747

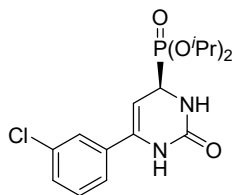

1h <sup>1</sup>H NMR (400 MHz, CDCl<sub>3</sub>)

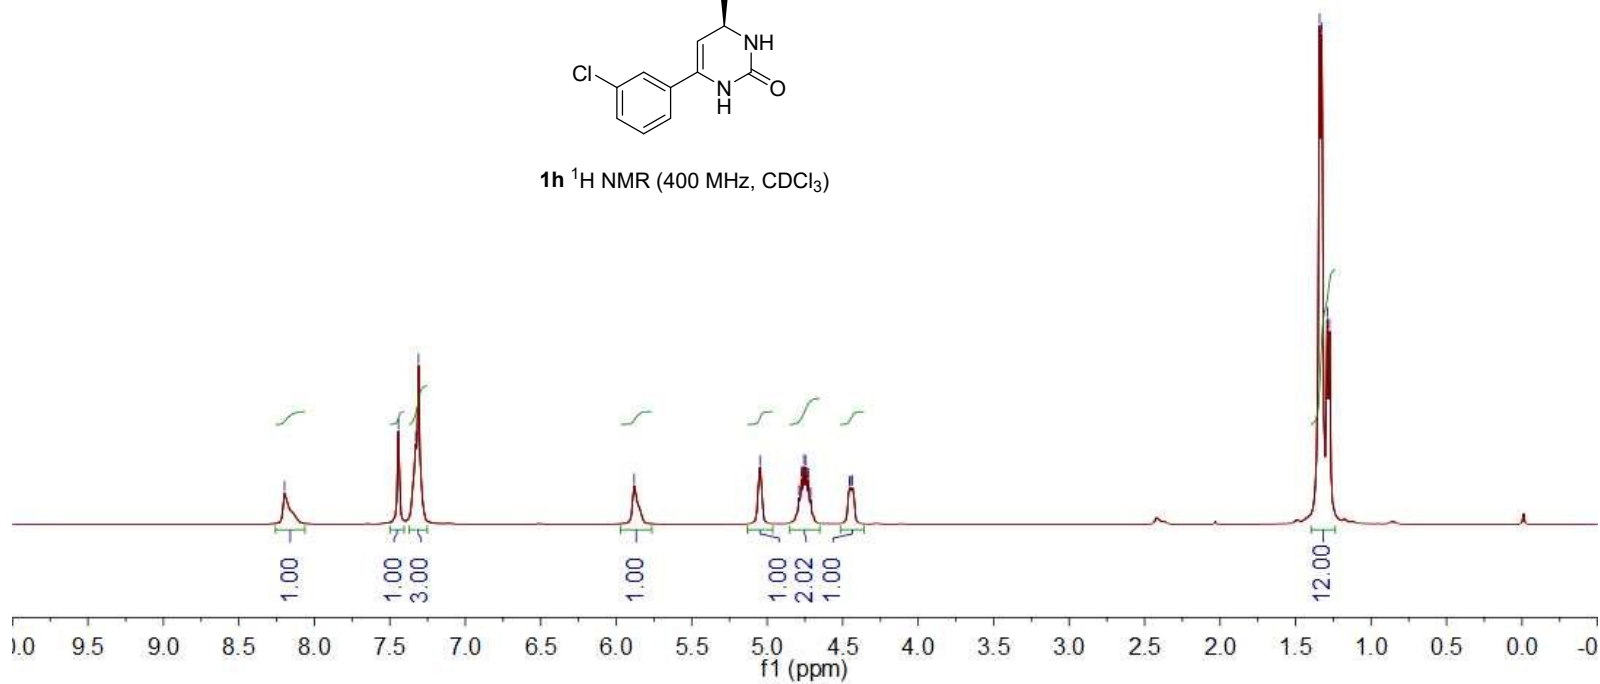

<sup>13</sup>C NMR FM-5-34H in CDCl<sub>3</sub>

154.17

137.33

137.23

135.70

134.70

129.96

129.18

125.50

123.36

91.75

91.66

72.18

72.11

72.00

71.93

52.47

50.88

24.24

24.21

24.13

24.10

24.03

23.93

23.88

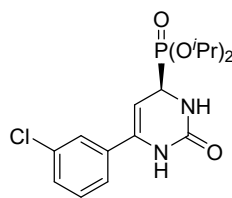

**1h** <sup>13</sup>C NMR (100 MHz, CDCl<sub>3</sub>)

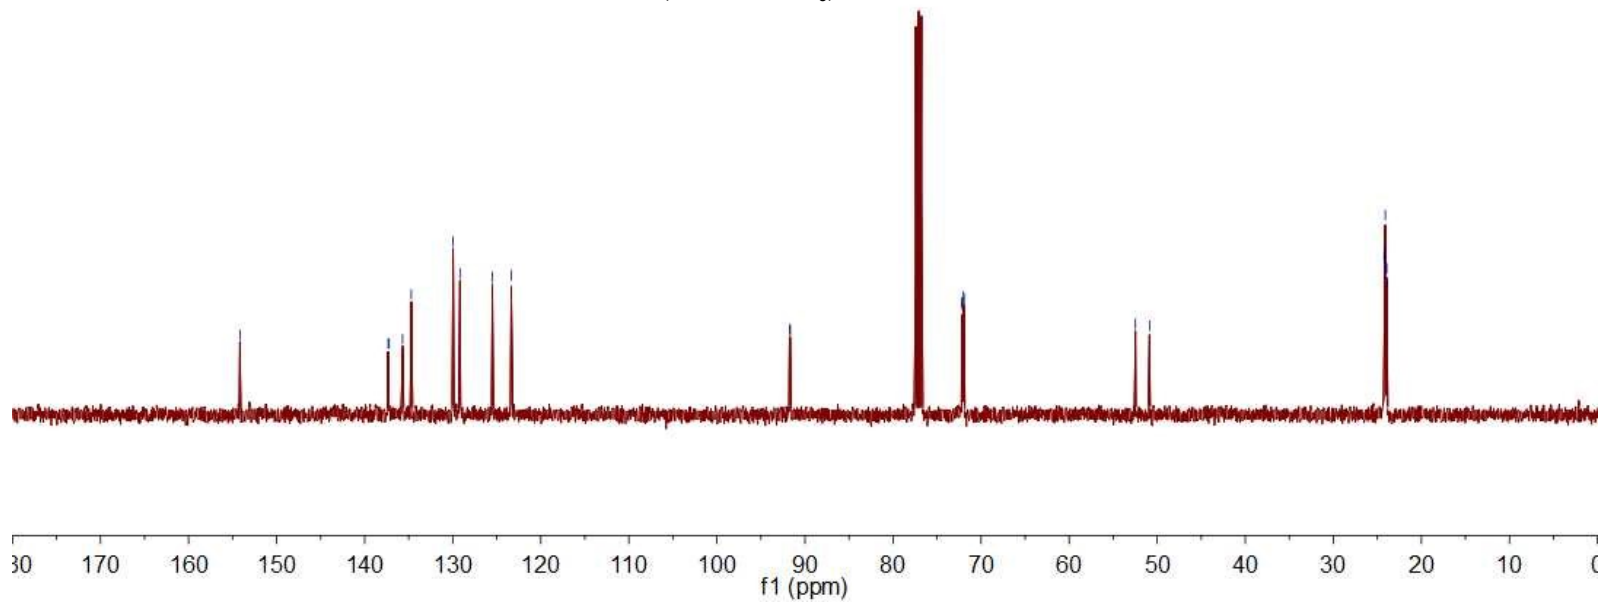

31P NMR FM-5-34H in CDCl3

—15.90

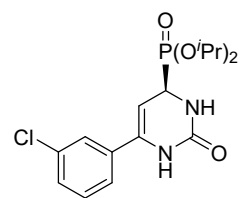

**1h** <sup>31</sup>P NMR (162 MHz, CDCl<sub>3</sub>)

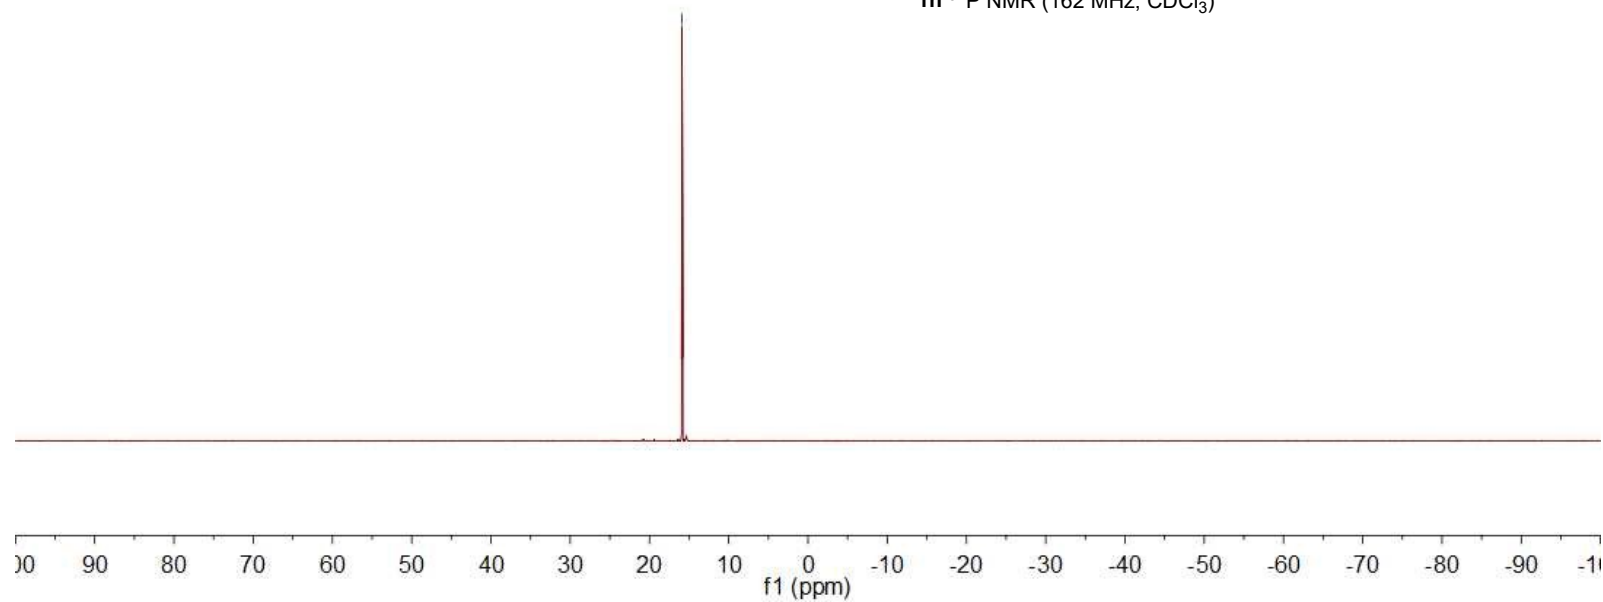



<sup>1</sup>H NMR FM-5-34I in CDCl<sub>3</sub>

7.5145  
7.3748  
7.3586  
7.2140  
7.1980

5.6907

5.0263  
4.7464  
4.4460

2.6530  
2.6363

1.3302  
1.2822  
1.2701  
1.2450  
1.2266

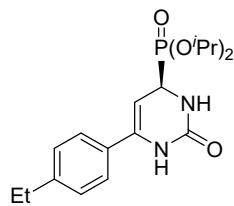

**1i** <sup>1</sup>H NMR (400 MHz, CDCl<sub>3</sub>)

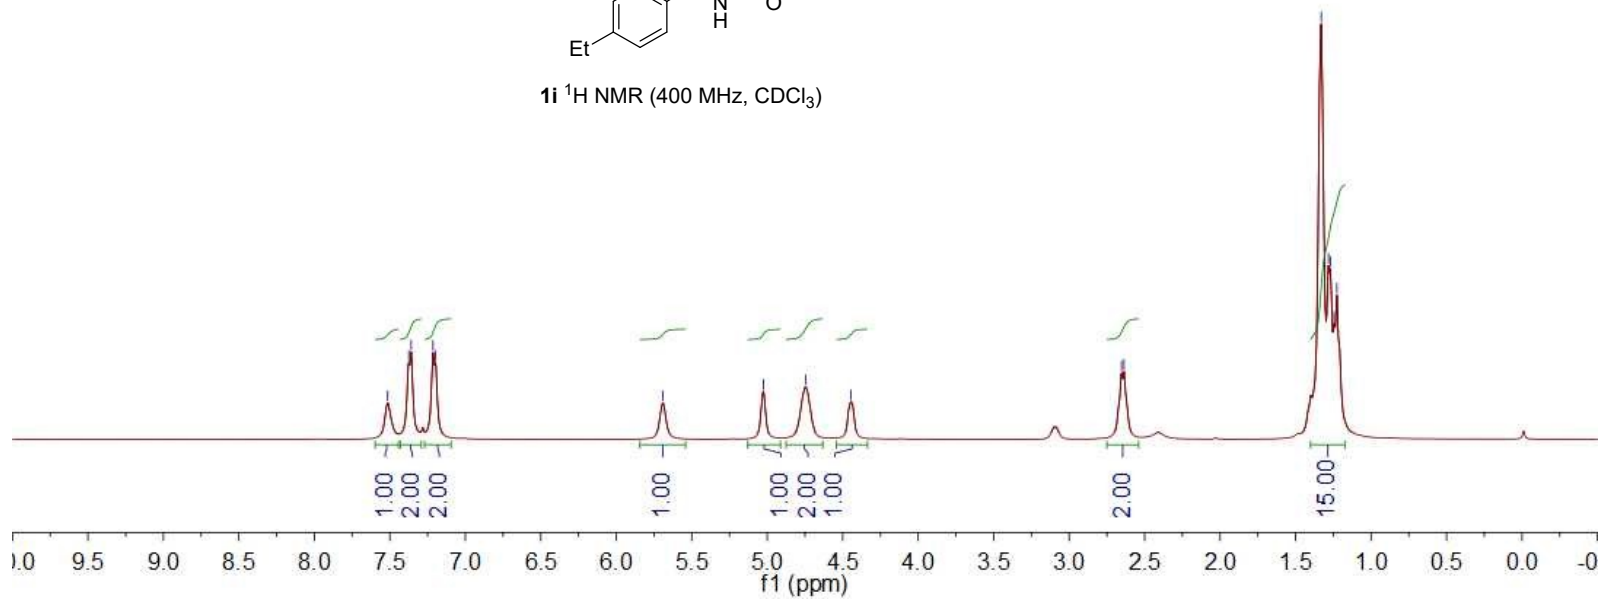

<sup>13</sup>C NMR FM-5-34I in CDCl<sub>3</sub>

154.00

145.59

138.27

138.16

131.41

128.28

125.04

89.94

89.85

72.19

72.11

71.80

71.72

52.52

50.92

28.57

24.28

24.25

24.09

24.05

23.90

23.85

15.33

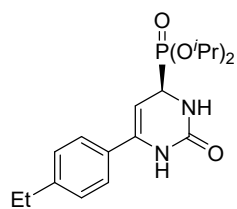

**1i** <sup>13</sup>C NMR (100 MHz, CDCl<sub>3</sub>)

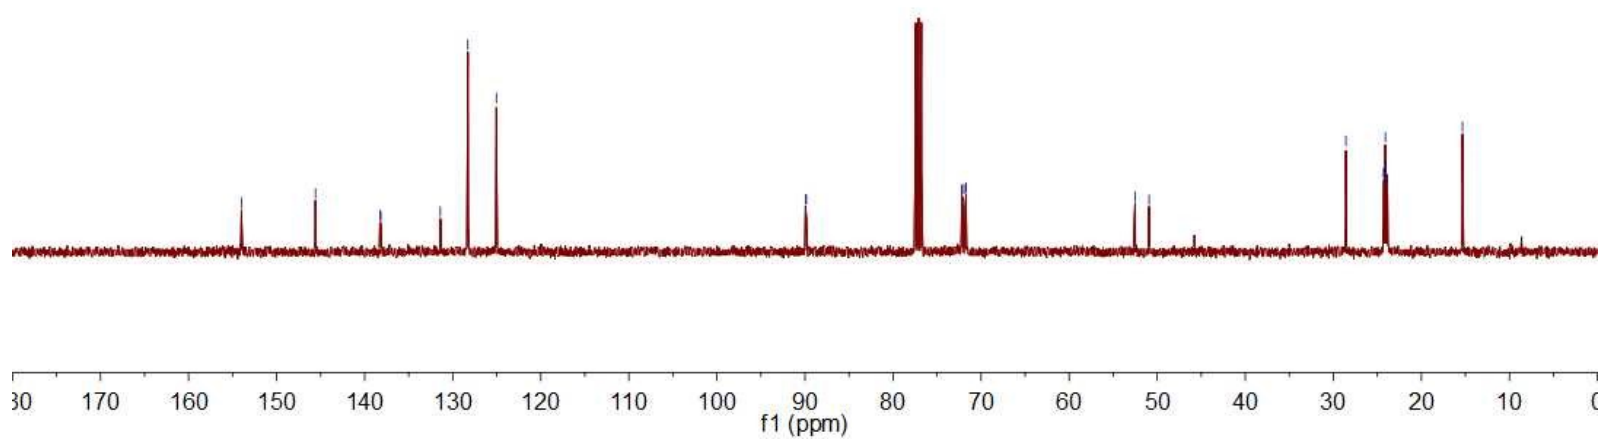

31P NMR FM-5-34I in CDCl3

-16.16

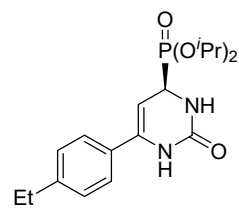

1i <sup>31</sup>P NMR (162 MHz, CDCl<sub>3</sub>)

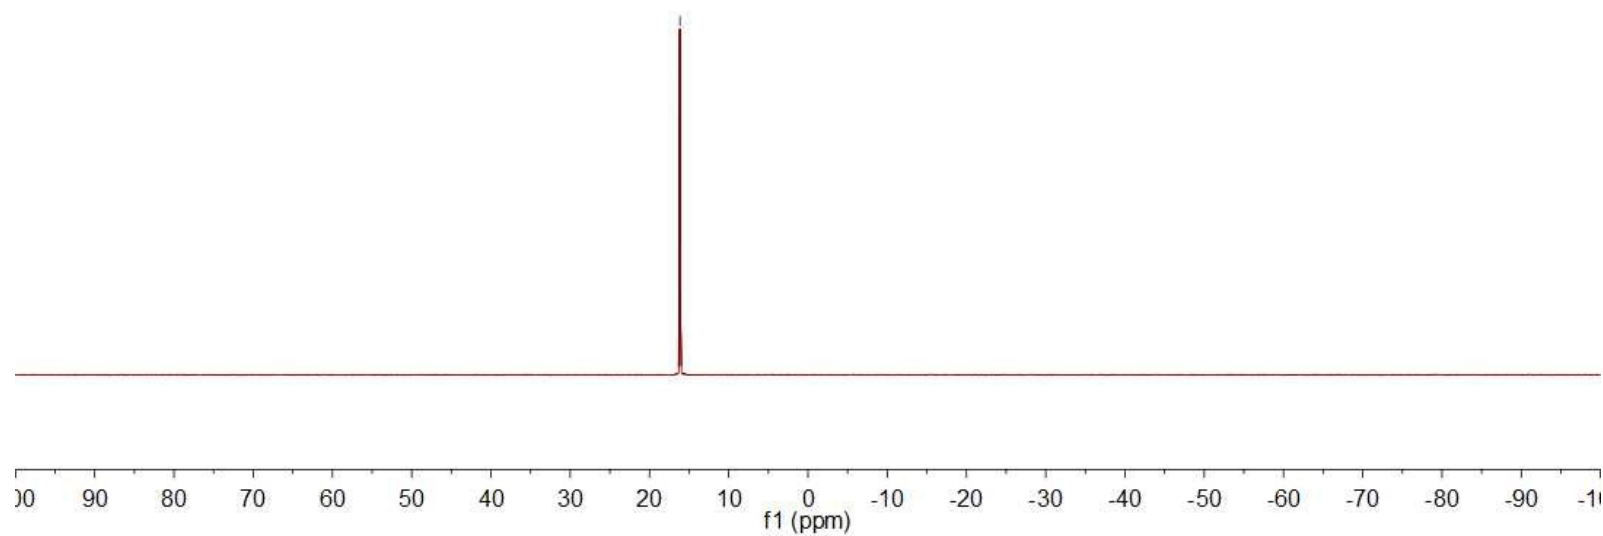

<sup>1</sup>H NMR FM-5-34J in CDCl<sub>3</sub>

8.2561  
8.2504  
8.2333  
7.8407  
7.5065  
7.4978  
7.4958  
7.4818  
6.8768

5.7659  
4.9323  
4.9269  
4.9225  
4.9180  
4.9127  
4.8390  
4.8234  
4.8076  
4.7906  
4.7734  
4.7574  
4.7416  
4.7244  
4.5315  
4.5269  
4.5213  
4.5164  
4.5118  
4.5071  
4.5016  
1.3873  
1.3838  
1.3723  
1.3453  
1.3298

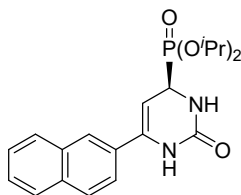

**1j** <sup>1</sup>H NMR (400 MHz, CDCl<sub>3</sub>)

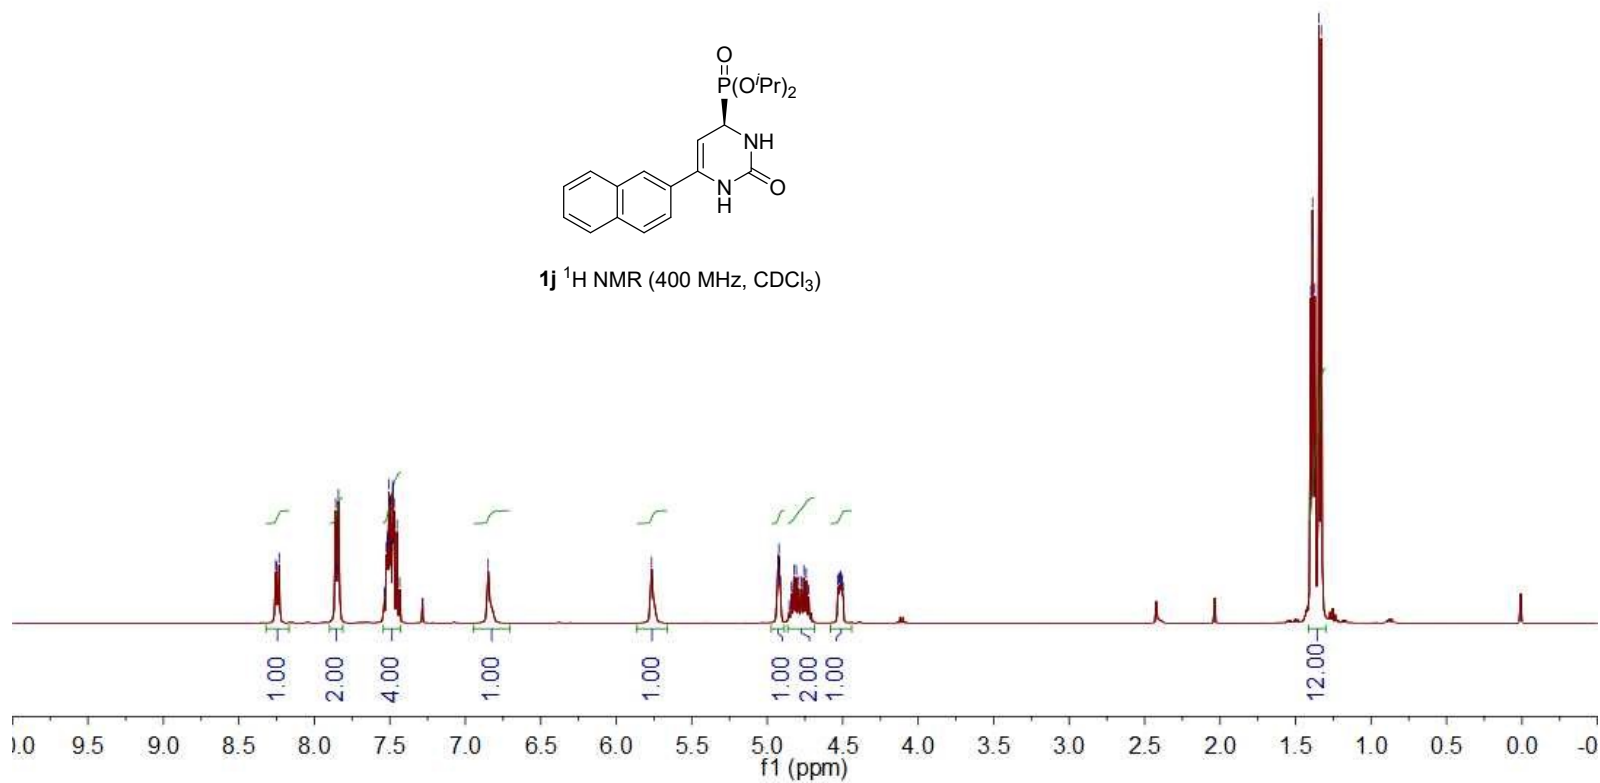

<sup>13</sup>C NMR FM-5-34J in CDCl<sub>3</sub>

153.22  
137.26  
137.16  
133.69  
132.72  
130.83  
129.61  
128.43  
126.62  
126.28  
126.13  
126.10  
125.23  
125.18

94.20  
94.11

72.11  
72.04  
71.73  
71.65

52.74  
51.14

24.28  
24.25  
24.18  
24.14  
24.11

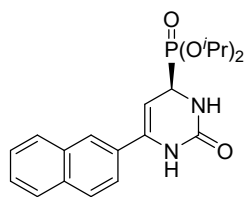

**1j** <sup>13</sup>C NMR (100 MHz, CDCl<sub>3</sub>)

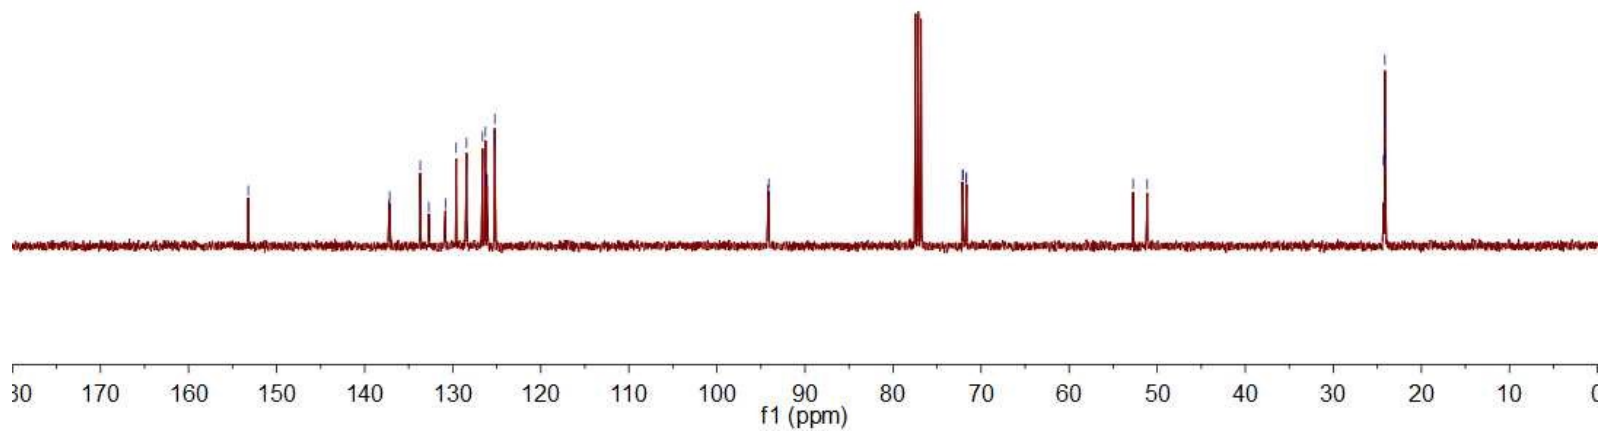

31P NMR FM-5-34J in CDCl3

-16.33

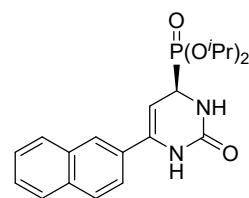

1j <sup>31</sup>P NMR (162 MHz, CDCl<sub>3</sub>)

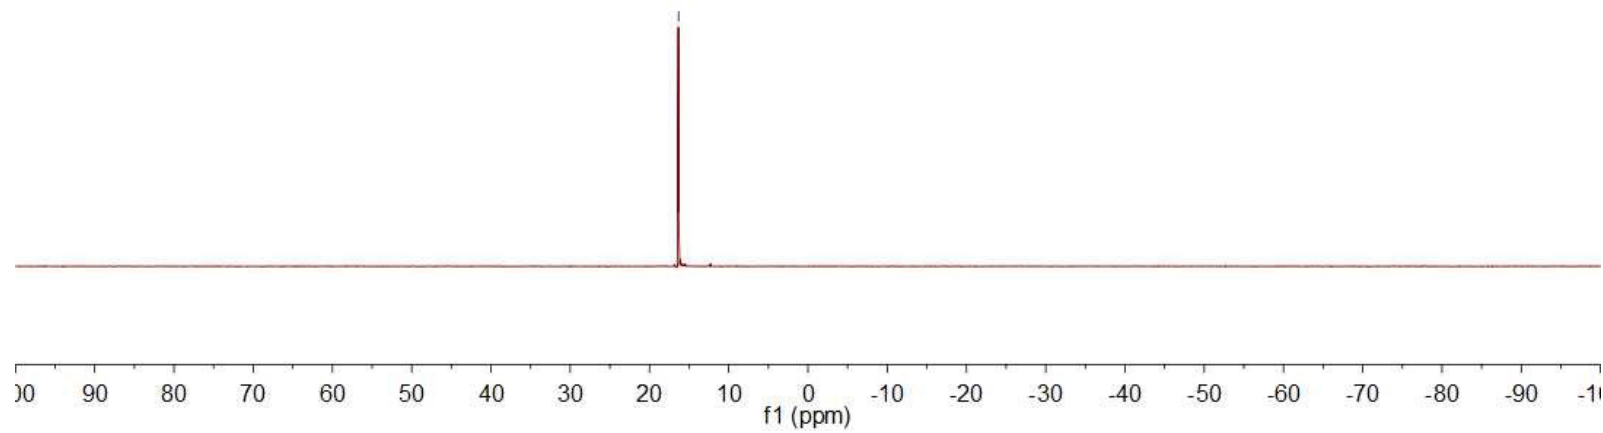

<sup>1</sup>H NMR FM-5-34K in CDCl<sub>3</sub>

7.9137  
7.4684  
7.4640  
7.4488  
7.3941  
7.3855  
7.3726  
7.3561  
6.2730

5.0566  
4.4569  
4.4497  
4.4451  
4.4401  
4.4360  
4.4287  
4.2203  
4.2009  
4.1830  
4.1738  
4.1653  
4.1561  
4.1478  
4.1304

1.3557  
1.3381  
1.3202  
1.3146  
1.2968  
1.2792

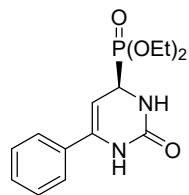

**1k** <sup>1</sup>H NMR (400 MHz, CDCl<sub>3</sub>)

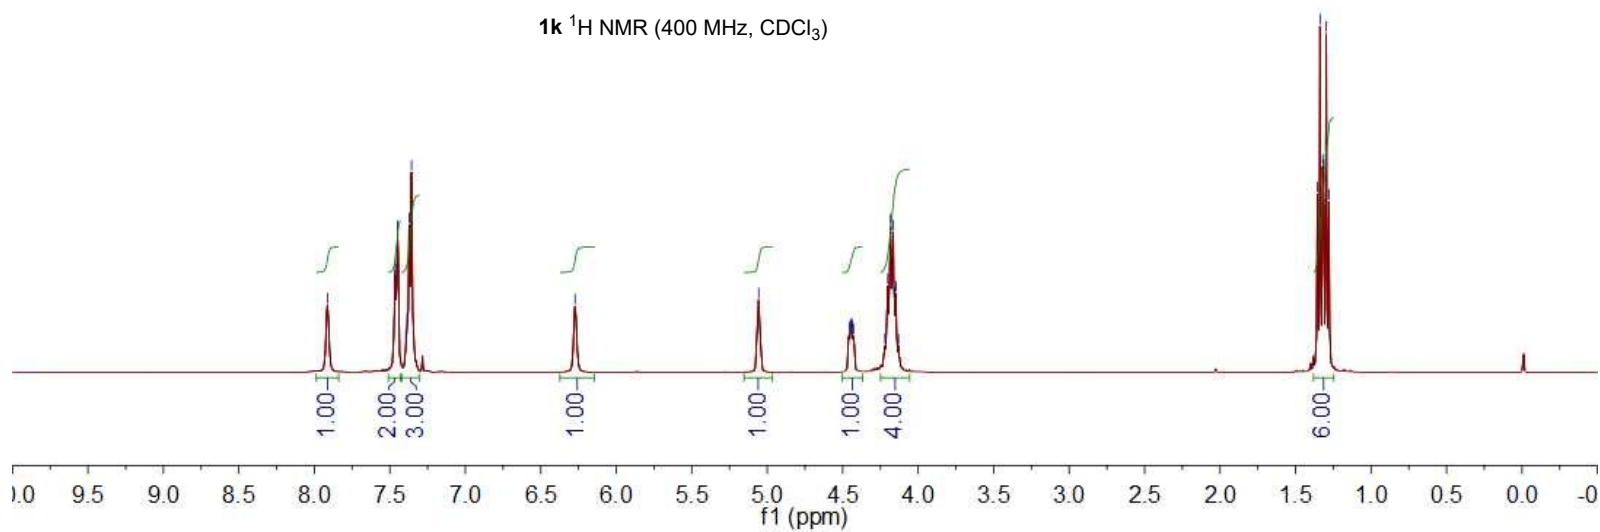

13C NMR FM-5-34K in CDCl<sub>3</sub>

154.52  
138.73  
138.63  
133.86  
133.82  
129.29  
128.77  
125.21  
125.19

90.42  
90.33

63.62  
63.55  
63.00  
62.92

51.77  
50.19

16.66  
16.61  
16.55  
16.50

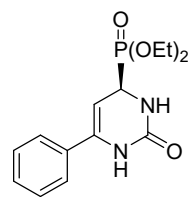

**1k** <sup>13</sup>C NMR (100 MHz, CDCl<sub>3</sub>)

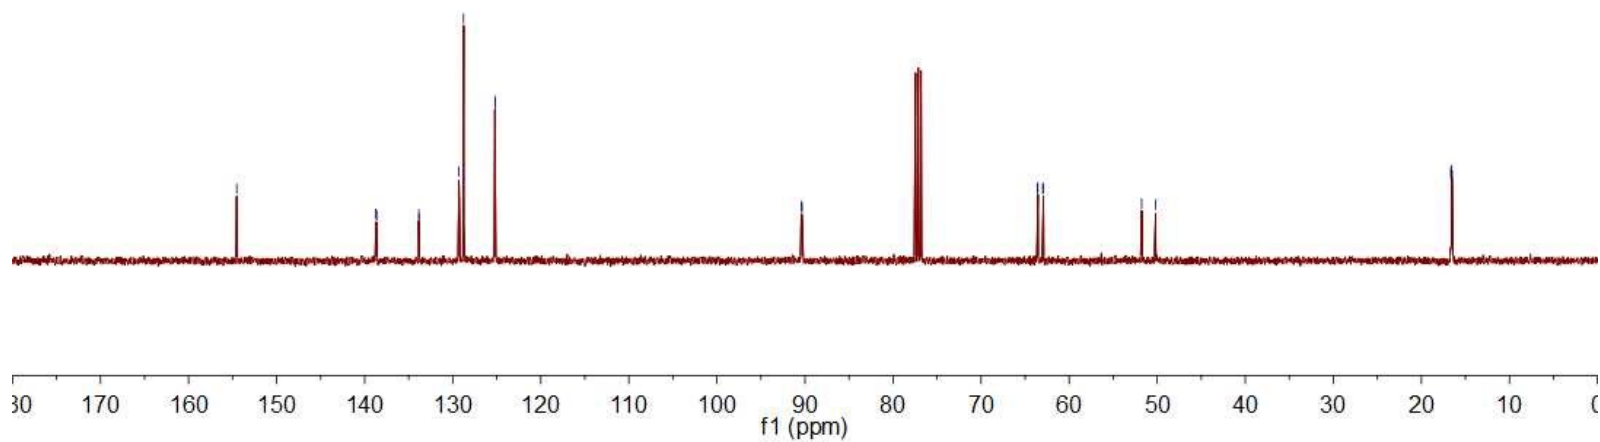



31P NMR FM-5-34K in CDCl3

—18.01

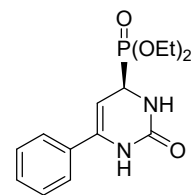

1k <sup>31</sup>P NMR (162 MHz, CDCl<sub>3</sub>)

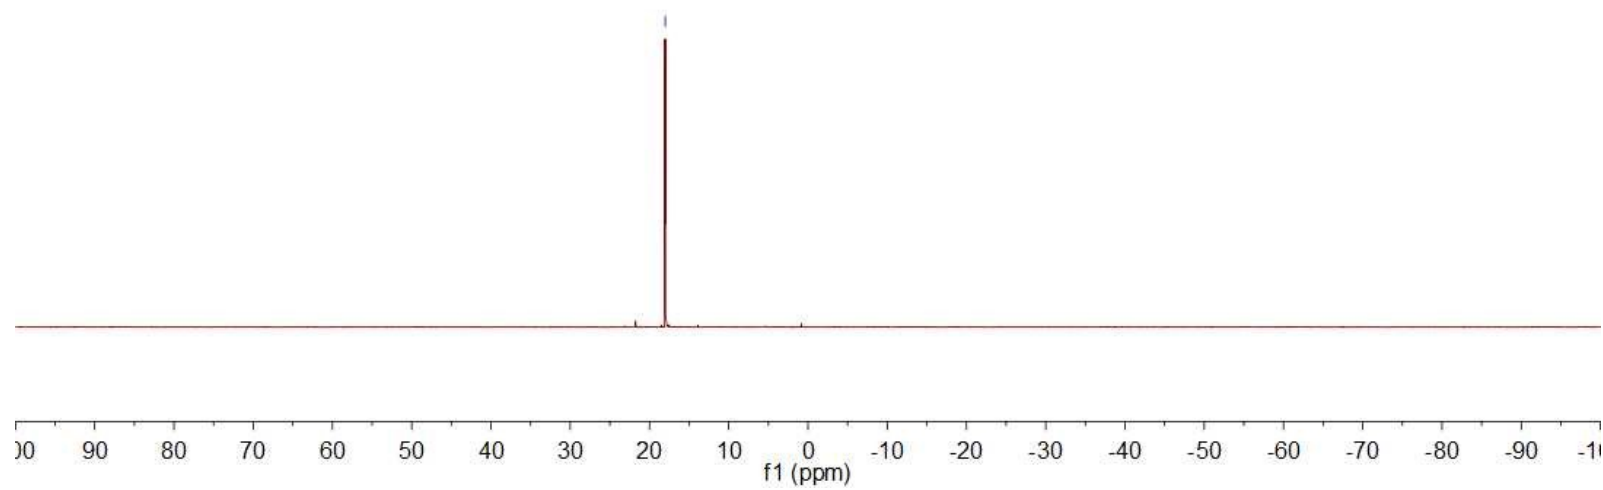

<sup>1</sup>H NMR FM-5-34L in CDCl<sub>3</sub>

7.4031

5.2373  
4.7906  
4.7753  
4.7598  
4.7492  
4.7332  
4.7173  
4.5322  
4.3123  
4.3076  
4.3026

1.8006  
1.7895  
1.3542  
1.3499  
1.3403  
1.3348  
1.3252  
1.3078

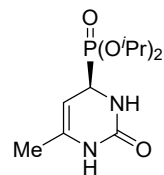

**11** <sup>1</sup>H NMR (400 MHz, CDCl<sub>3</sub>)

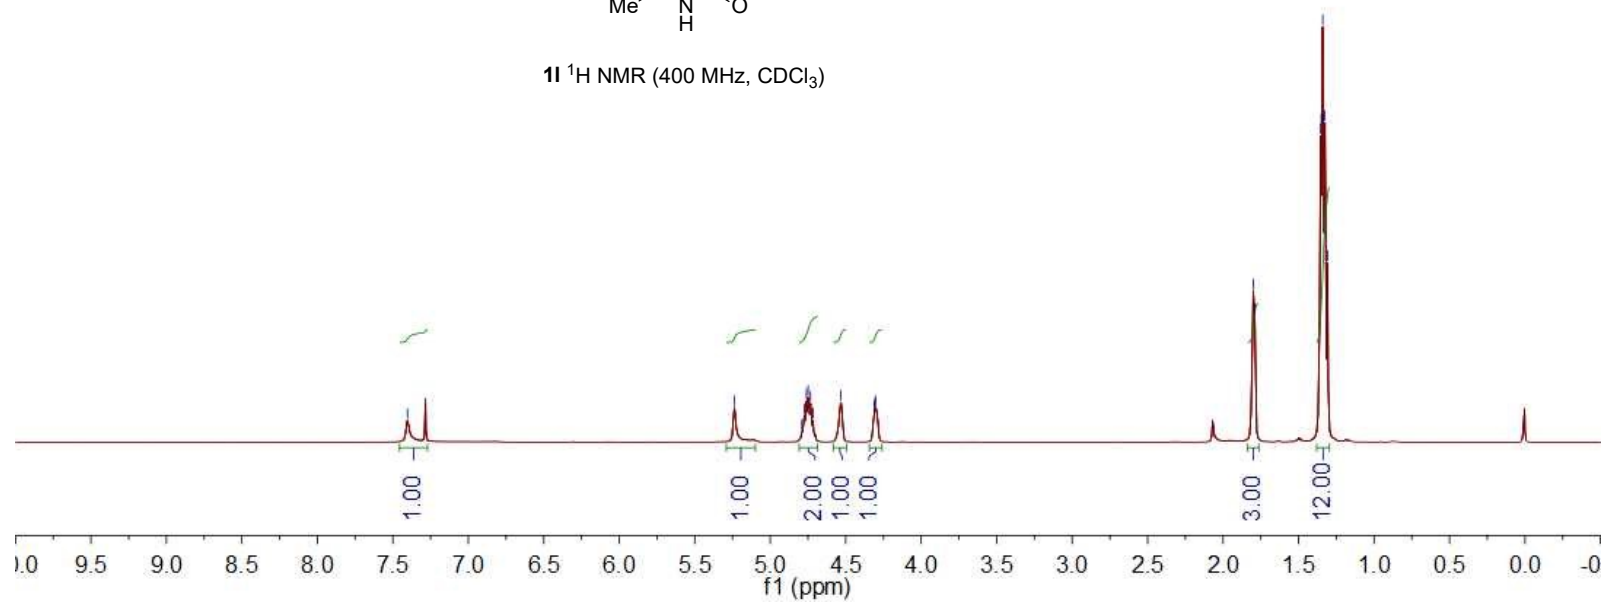

13C NMR FM-5-34L in CDCl3

154.28

135.16  
135.06

88.90  
88.82

71.93  
71.86  
71.62  
71.55

52.16  
50.56

24.22  
24.19  
24.10  
24.06  
24.03  
23.98  
23.82  
23.77  
18.49  
18.47

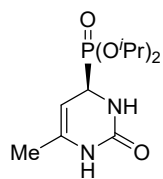

11 <sup>13</sup>C NMR (100 MHz, CDCl<sub>3</sub>)

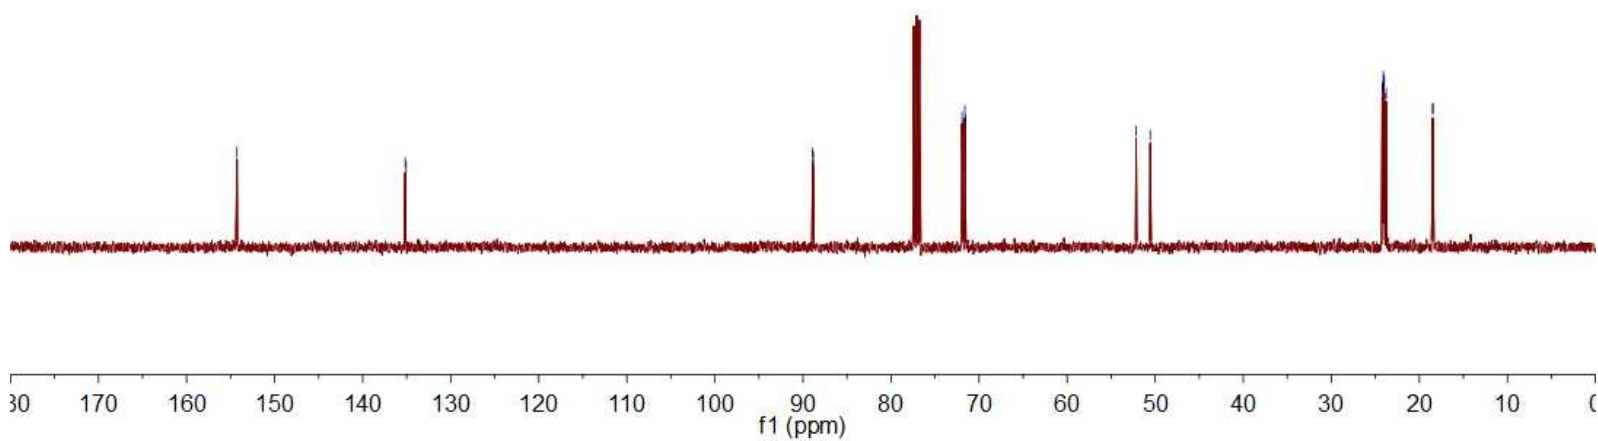

31P NMR FM-5-34L in CDCl3

-16.57

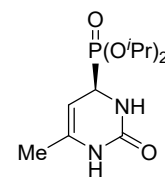

11 <sup>31</sup>P NMR (162 MHz, CDCl<sub>3</sub>)

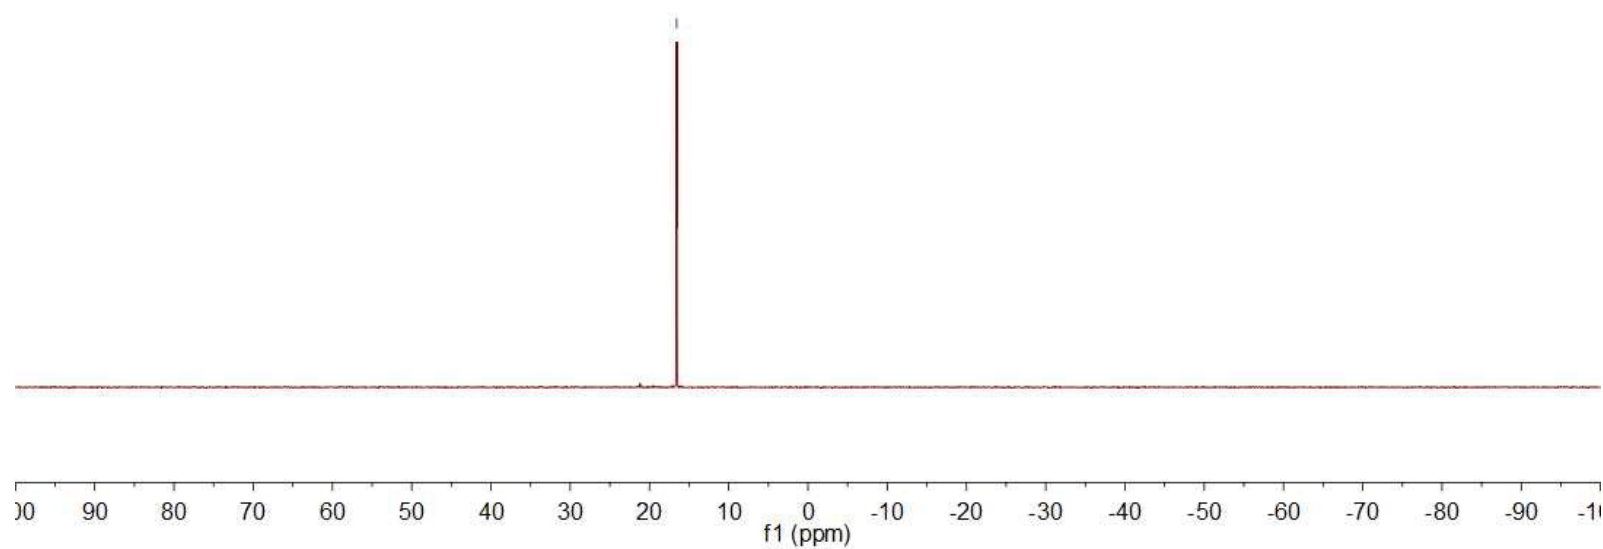

<sup>1</sup>H NMR FM-5-34M in CDCl<sub>3</sub>

7.3998  
7.3818  
7.3582  
7.3310  
7.3128

6.4997

5.5315

4.8119  
4.7965  
4.7810  
4.7654  
4.7500  
4.1364  
4.1161

1.8207  
1.3734  
1.3575  
1.3396

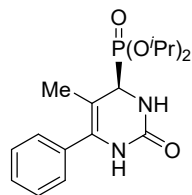

**1m** <sup>1</sup>H NMR (400 MHz, CDCl<sub>3</sub>)

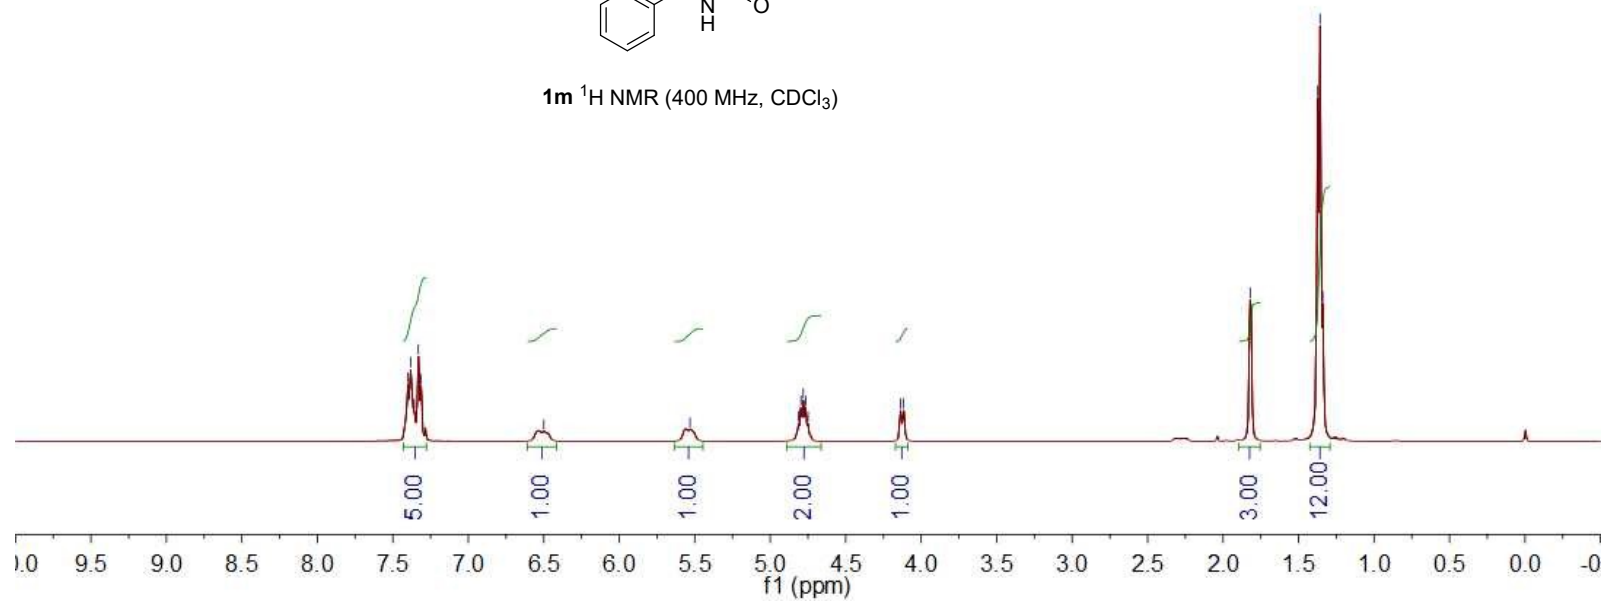

<sup>13</sup>C NMR FM-5-34M in CDCl<sub>3</sub>

153.77  
134.83  
134.80  
133.21  
133.12  
128.81  
128.65  
128.44  
128.41  
99.27  
99.21  
72.11  
72.04  
71.50  
71.42  
57.06  
55.51  
24.39  
24.36  
24.17  
24.13  
24.06  
24.01  
16.72  
16.71

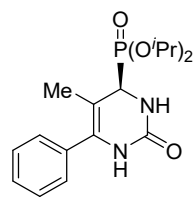

**1m** <sup>13</sup>C NMR (100 MHz, CDCl<sub>3</sub>)

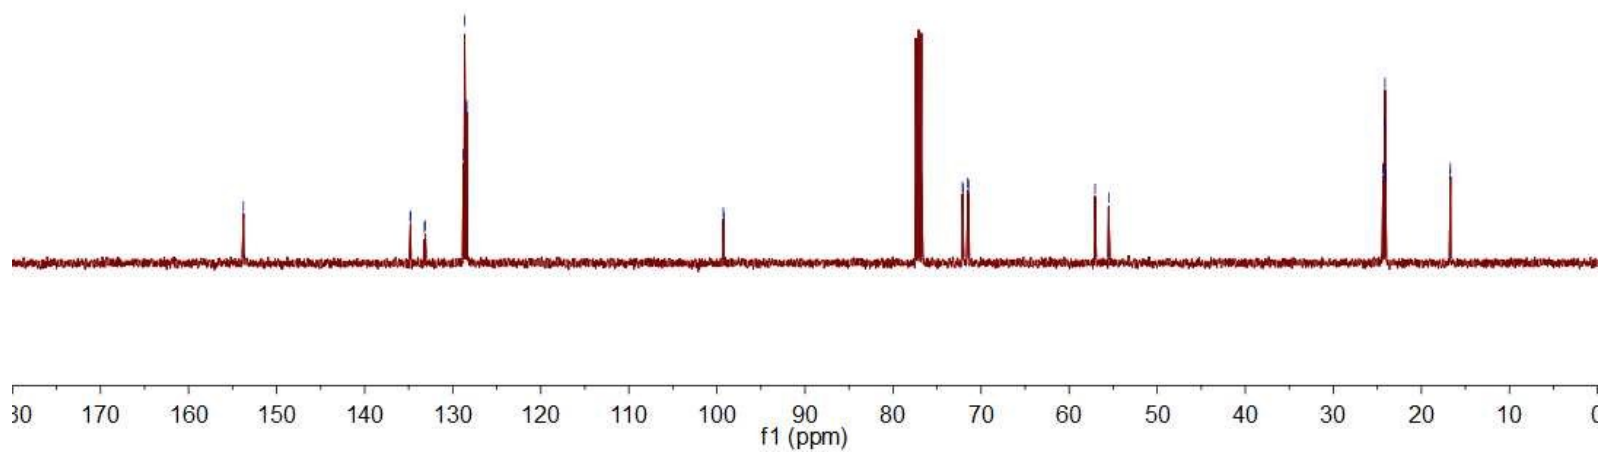

31P NMR FM-5-34M in CDCl3

— 16.93

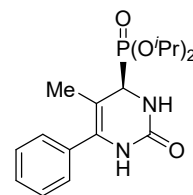

**1m** <sup>31</sup>P NMR (162 MHz, CDCl<sub>3</sub>)

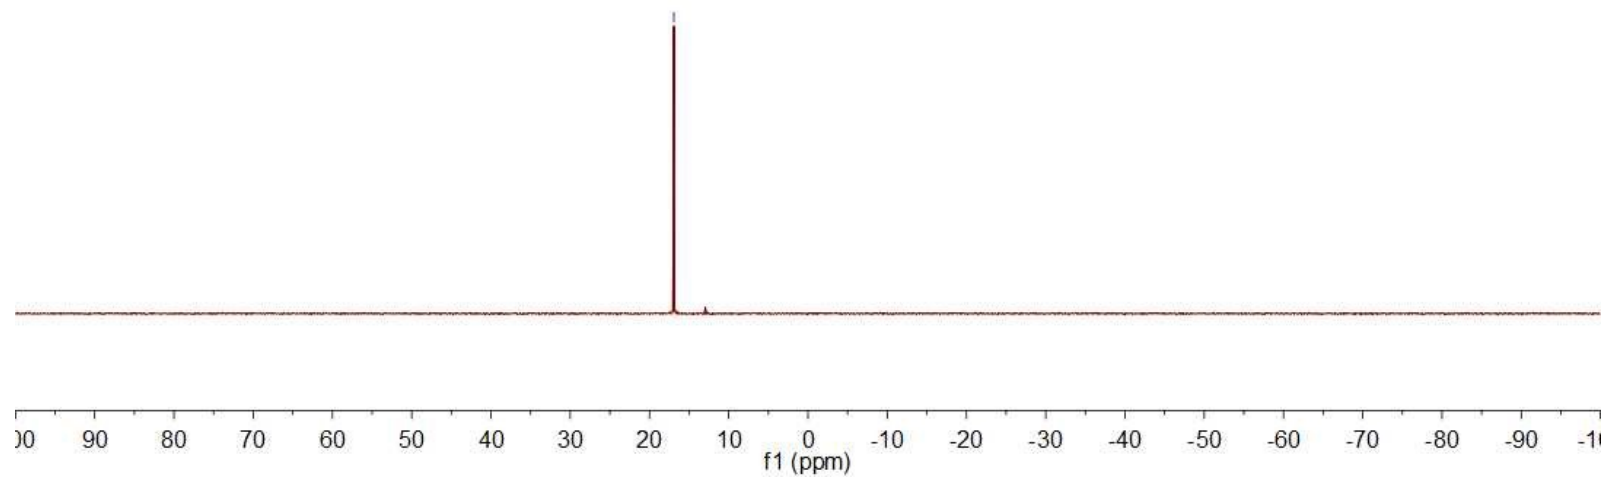

<sup>1</sup>H NMR FM-5-34N in CDCl<sub>3</sub>

7.3282  
7.3092  
7.2843  
6.9124  
6.8935  
6.8533  
6.4261

5.4732  
4.8086  
4.7944  
4.7793  
4.7642  
4.7496  
4.1325  
4.1121  
3.8106

1.8331  
1.3726  
1.3573  
1.3414

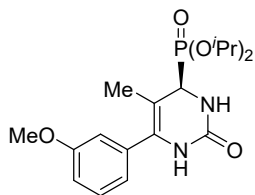

**1n** <sup>1</sup>H NMR (400 MHz, CDCl<sub>3</sub>)

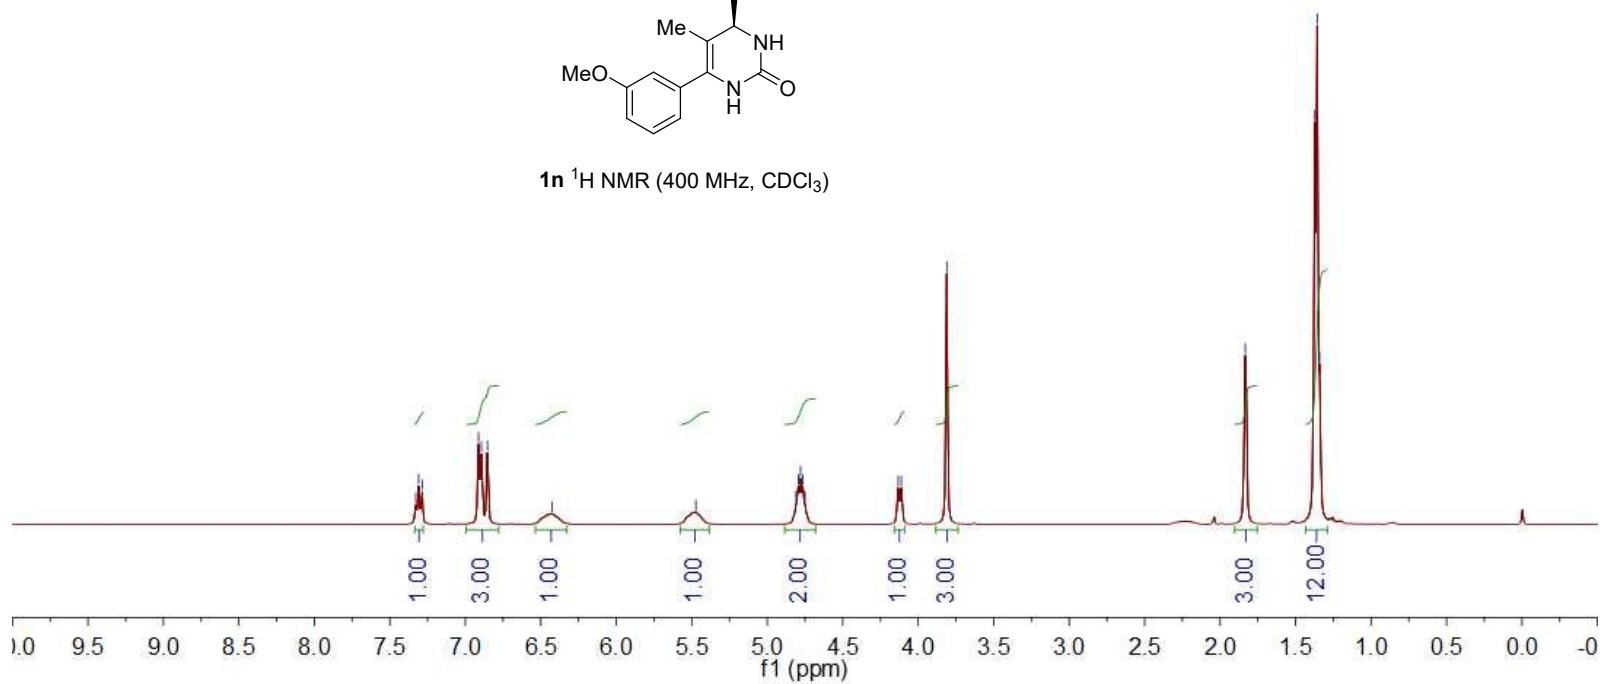



<sup>13</sup>C NMR FM-5-34N in CDCl<sub>3</sub>

159.67  
153.64  
136.10  
136.06  
133.02  
132.92  
129.75  
120.79  
120.76  
114.45  
113.89  
113.87

99.36  
99.29

72.14  
72.06  
71.52  
71.45

57.07  
55.53  
55.30

24.38  
24.35  
24.17  
24.13  
24.06  
24.01  
16.76  
16.75

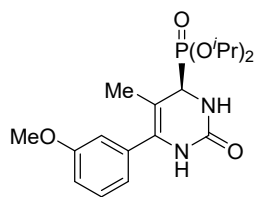

**1n** <sup>13</sup>C NMR (100 MHz, CDCl<sub>3</sub>)

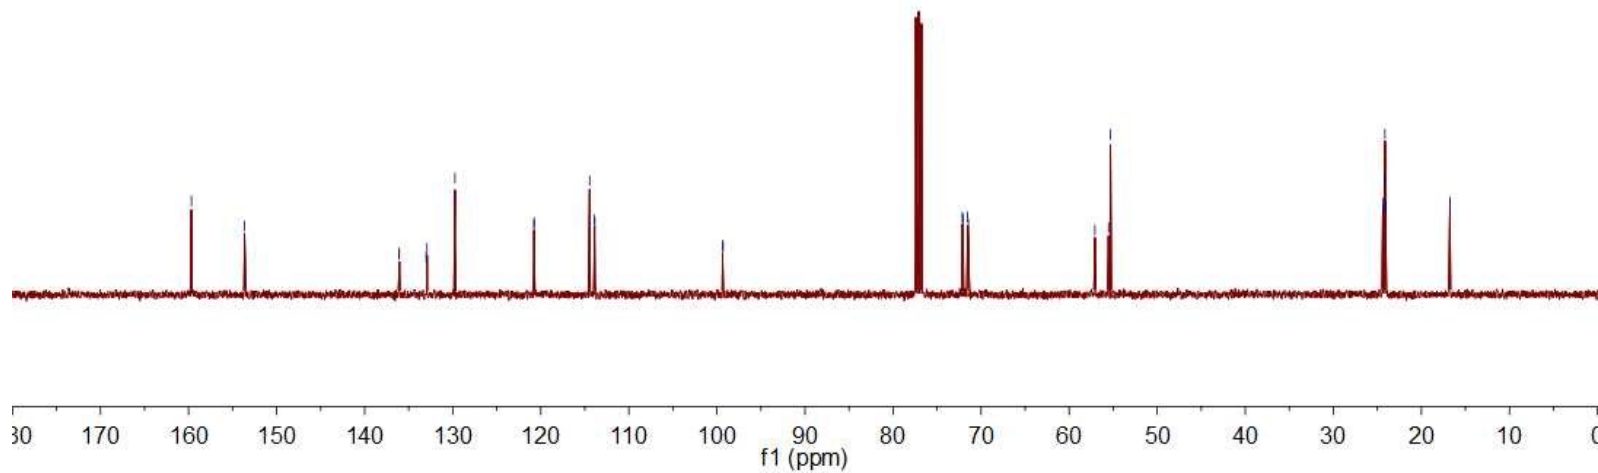

31P NMR FM-5-34N in CDCl3

— 16.90

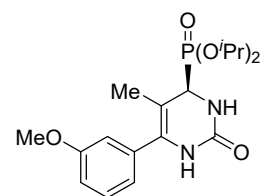

**1n** <sup>31</sup>P NMR (162 MHz, CDCl<sub>3</sub>)

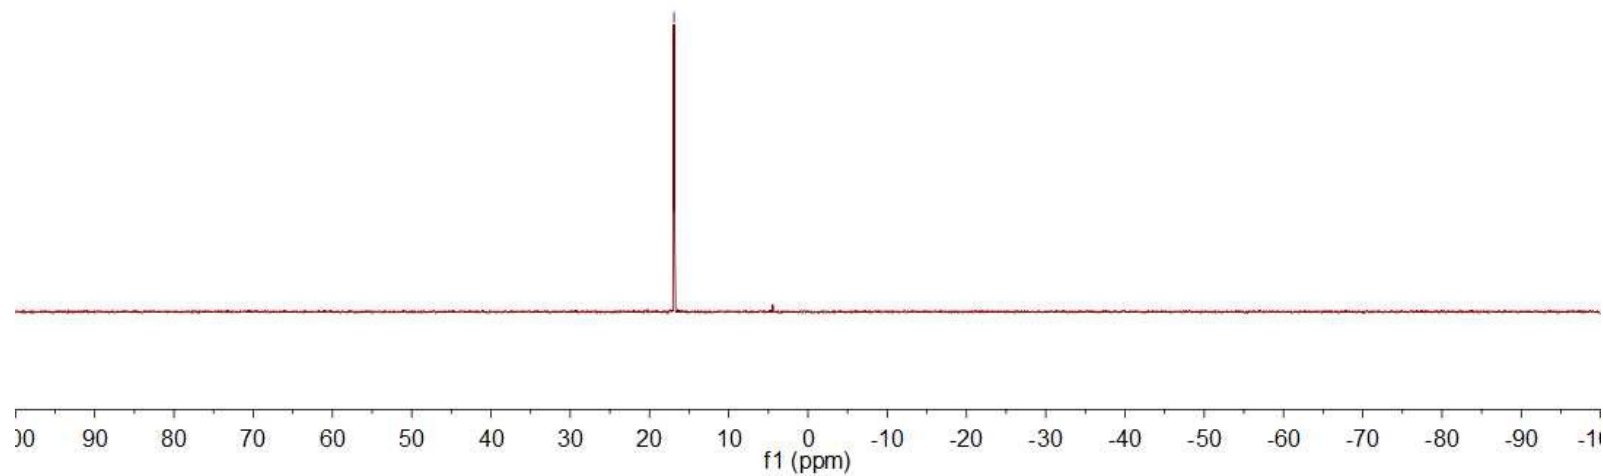

7.2552  
7.2430  
7.2253  
7.2169  
7.2114  
7.2035  
7.1605  
7.1574  
7.1490  
7.1418  
7.1362  
7.1296  
7.1146  
6.4350

5.5742  
4.7695  
4.7540  
4.7383  
4.7224  
4.7064  
4.6907  
4.6749  
4.6593  
4.6437  
4.6276  
4.6196  
4.6131  
4.5971  
4.5909

1.3574  
1.3420  
1.3204  
1.3049  
1.1614  
1.1460  
1.0988  
1.0833

<sup>1</sup>H NMR FM-5-340 in CDCl<sub>3</sub>

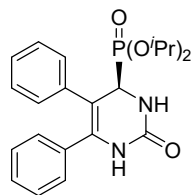

**1o** <sup>1</sup>H NMR (400 MHz, CDCl<sub>3</sub>)

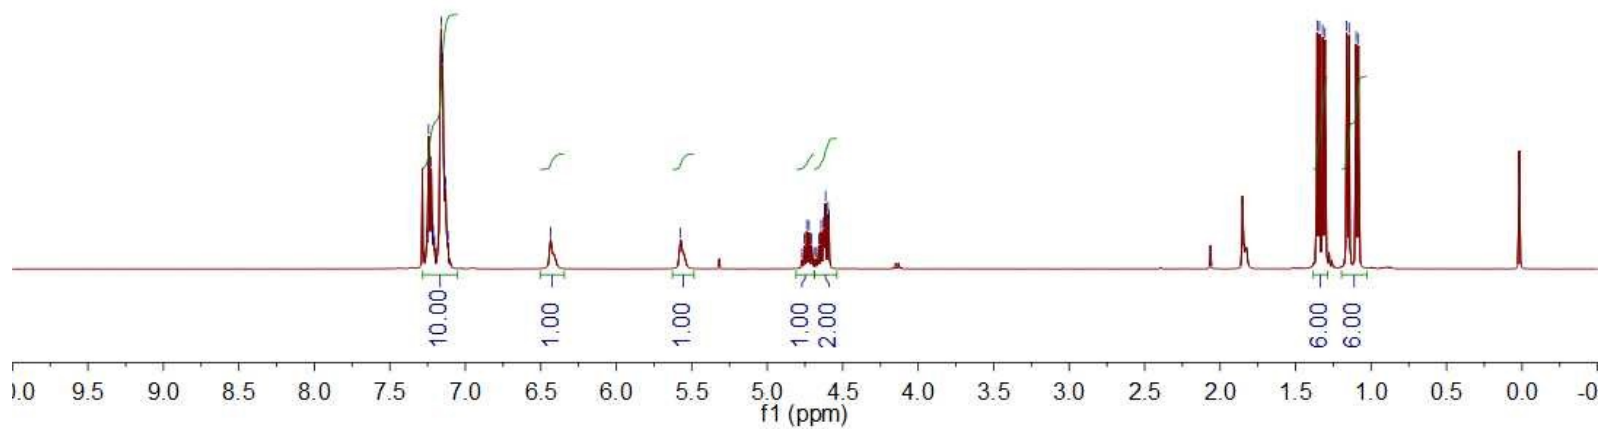

13C NMR FM-5-340 in CDCl3

154.17  
137.02  
136.98  
135.37  
135.00  
134.96  
130.30  
128.59  
128.44  
127.96  
126.67  
118.80

105.35  
105.31

71.74  
71.66

56.76  
55.19

24.29  
24.26  
24.06  
24.02  
23.99  
23.66  
23.61

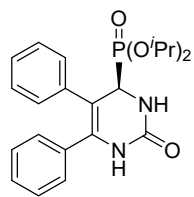

1o <sup>13</sup>C NMR (100 MHz, CDCl<sub>3</sub>)

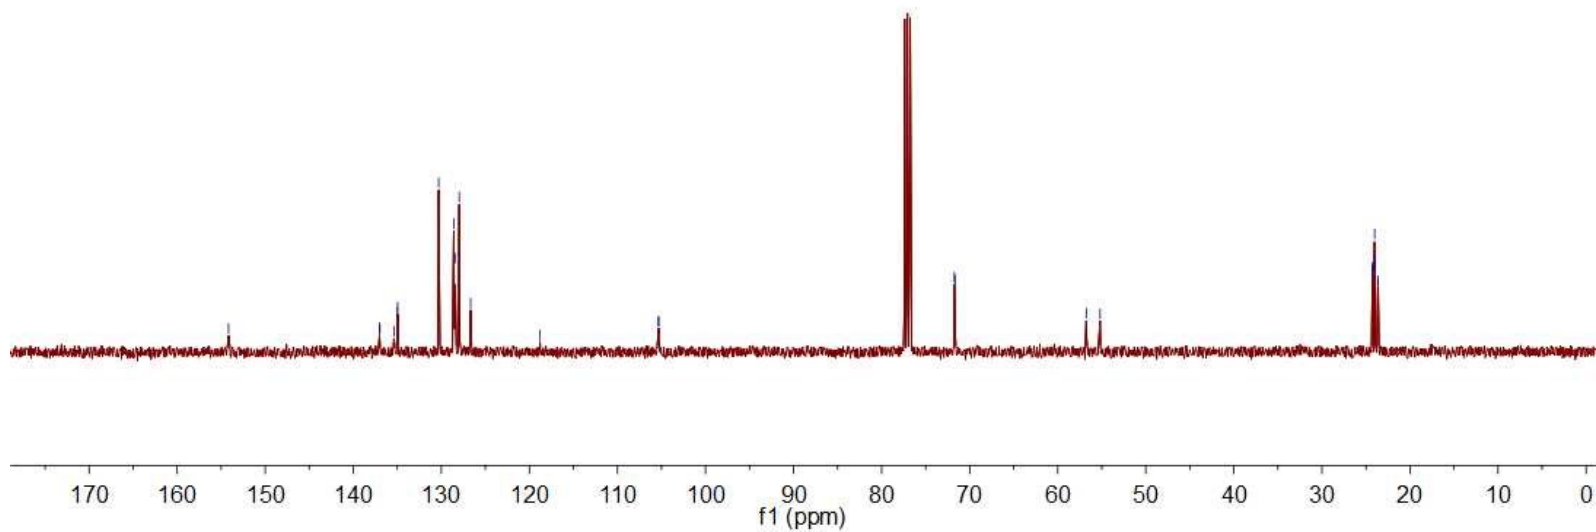

31P NMR FM-5-340 in CDCl3

—17.35

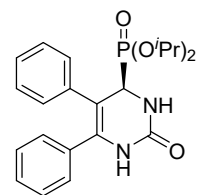

**1o** <sup>31</sup>P NMR (162 MHz, CDCl<sub>3</sub>)

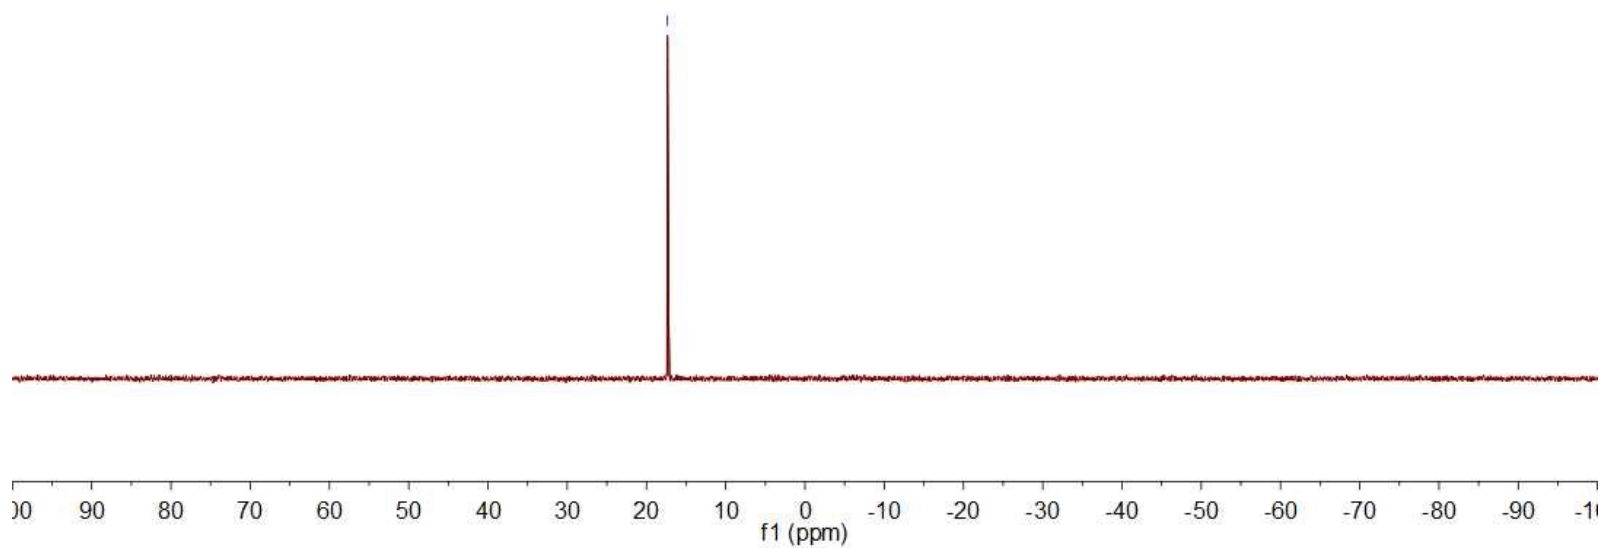

7.3906  
7.3717  
7.3534  
7.2996  
7.2797  
7.2593

5.2880  
5.2380  
4.6774  
4.6615  
4.6452  
4.6285  
4.6098  
4.5916  
4.5759

2.5525  
2.2922  
1.8973  
1.8918  
1.3038  
1.2884  
1.2428  
1.2274  
1.2076  
1.1923

<sup>1</sup>H NMR FM-5-57 in DMSO

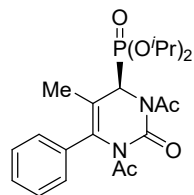

**4m** <sup>1</sup>H NMR (400 MHz, DMSO-d<sub>6</sub>)

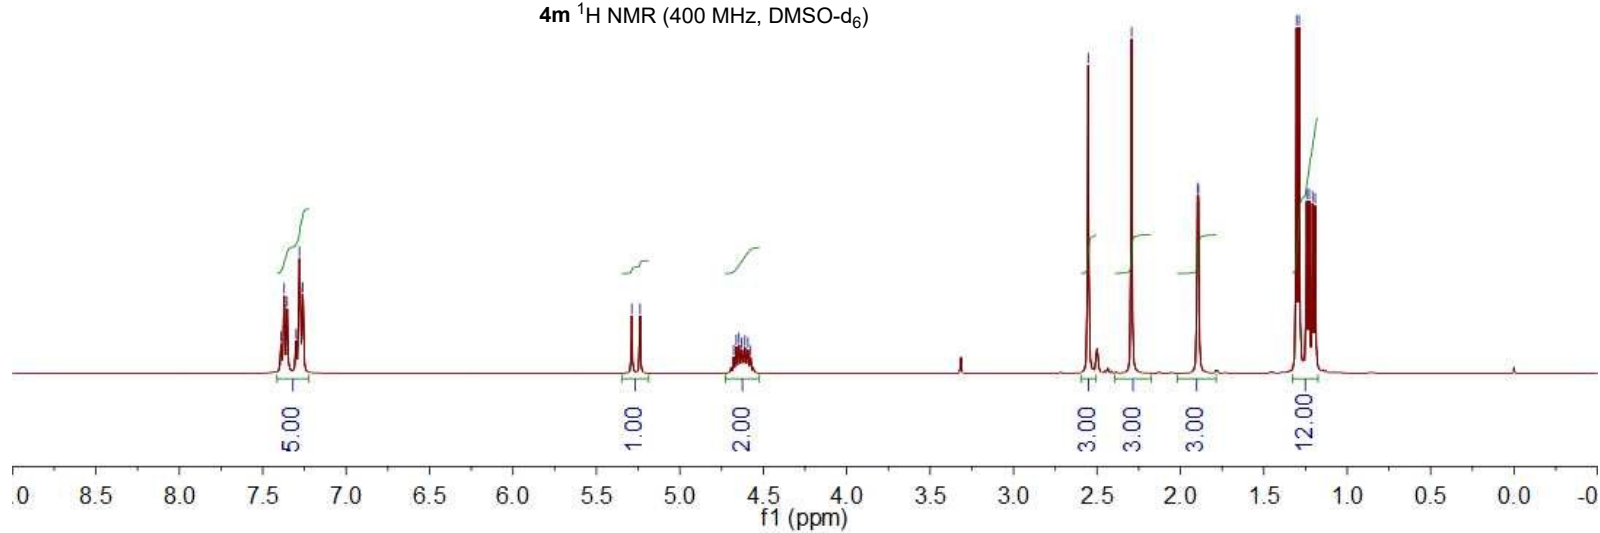

170.88  
170.87  
169.61

153.29  
135.98  
135.95  
135.53  
135.44  
128.38  
128.17  
127.93  
120.74  
120.73

72.41  
72.34  
71.91  
71.84

53.67  
52.12

26.36  
26.10  
24.30  
24.26  
24.08  
24.04  
23.91  
23.88  
23.85  
23.83  
18.04  
18.00

<sup>13</sup>C NMR FM-5-57 in DMSO

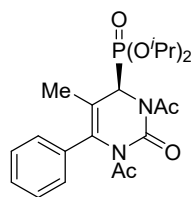

**4m** <sup>13</sup>C NMR (100 MHz, DMSO-d<sub>6</sub>)

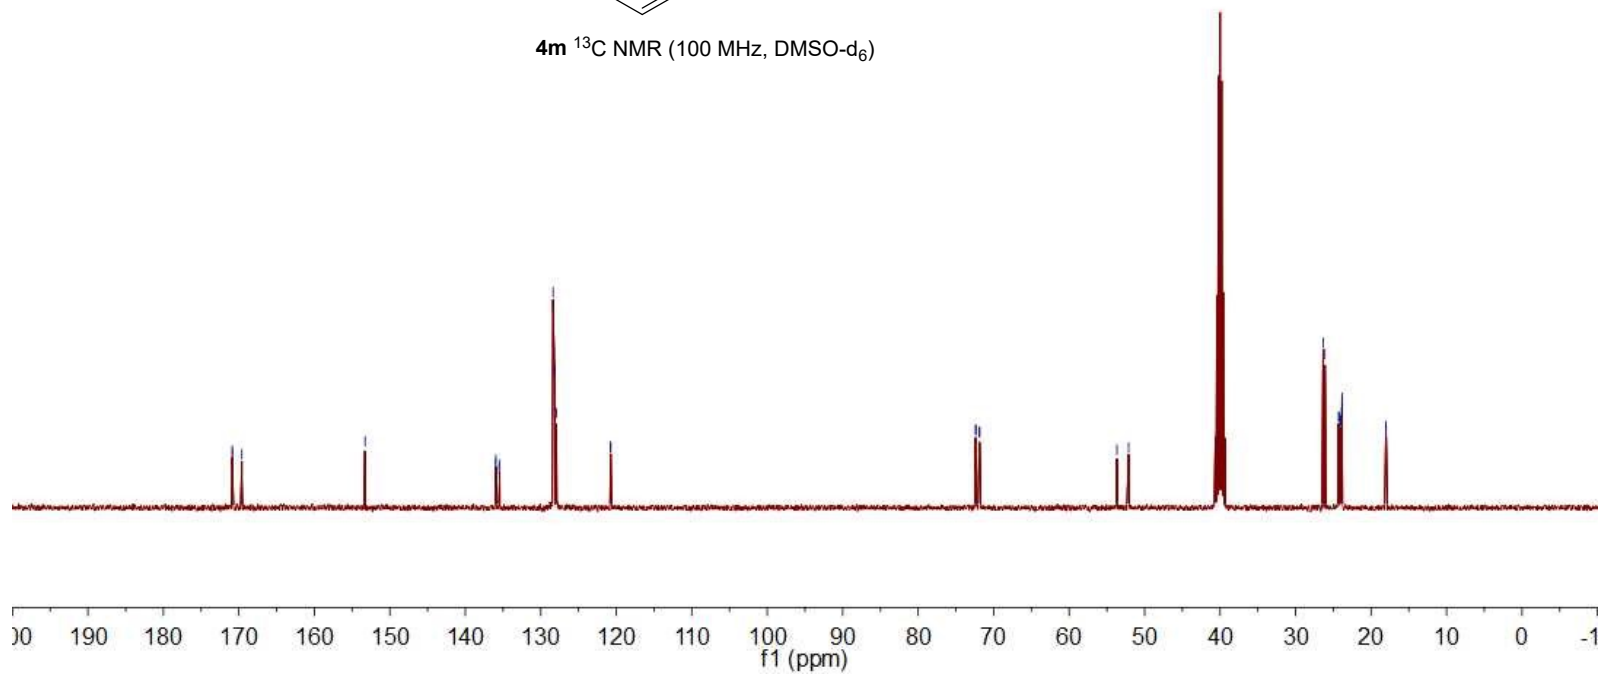

31P NMR FM-5-57 in DMSO

-16.71

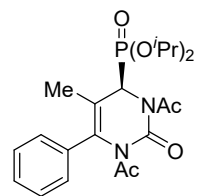

4m <sup>31</sup>P NMR (162 MHz, DMSO-d<sub>6</sub>)

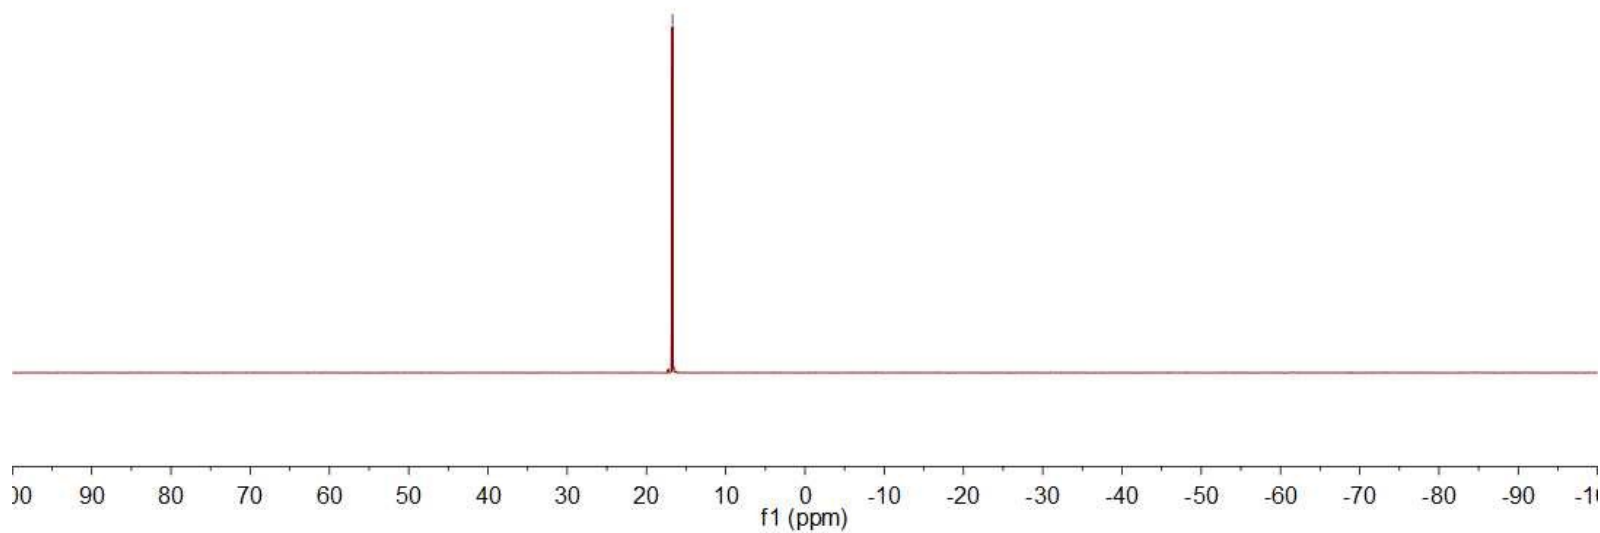



8.6481  
8.6347

7.3600  
7.3415  
7.3229  
7.2613  
7.2434  
7.1729  
7.1542

4.6664  
4.6503  
4.6344  
4.6186  
4.0118  
3.9984  
3.9697  
3.9562

2.2071  
1.8531  
1.8477  
1.3156  
1.3000  
1.2915  
1.2771  
1.2634  
1.2482

<sup>1</sup>H NMR FM-5-66 in DMSO

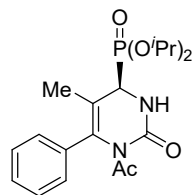

5m <sup>1</sup>H NMR (400 MHz, DMSO-d<sub>6</sub>)

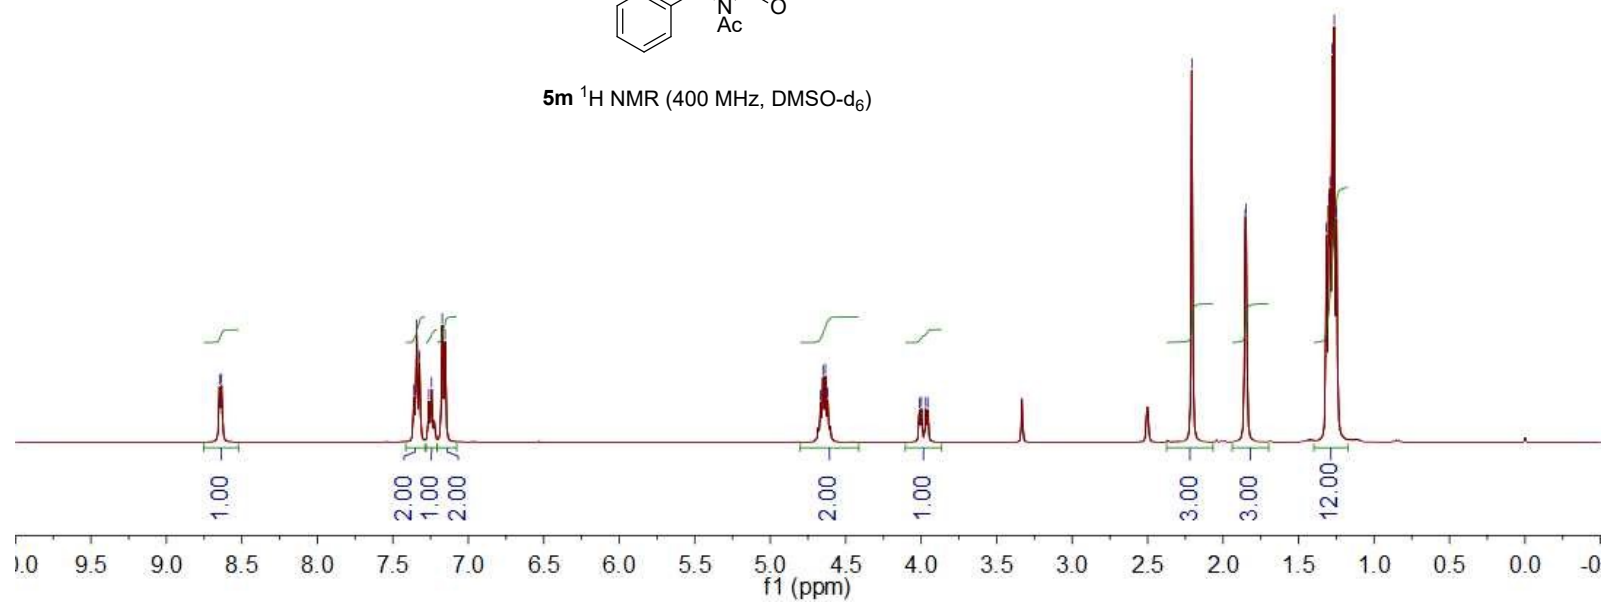

168.45  
168.43

154.65

137.12  
137.09  
135.75  
135.65

128.32  
127.84  
120.00  
119.99

71.49  
71.42  
71.33  
71.26

54.77  
53.24

25.65  
24.22  
24.18  
24.11  
24.08  
24.06  
23.99  
23.95  
17.75  
17.71

<sup>13</sup>C NMR FM-5-66 in DMSO

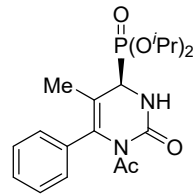

5m <sup>13</sup>C NMR (100 MHz, DMSO-d<sub>6</sub>)

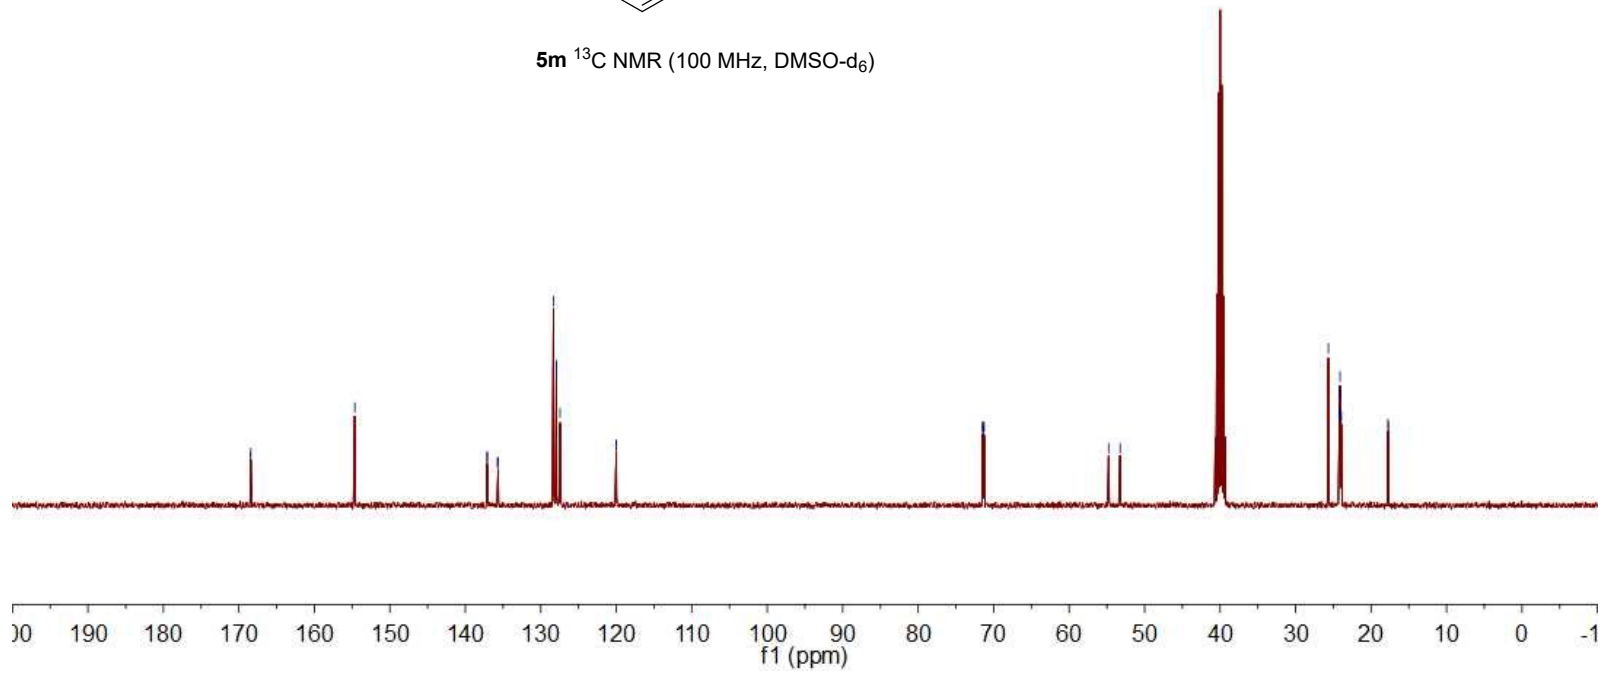

31P NMR FM-5-66 in DMSO

-18.15

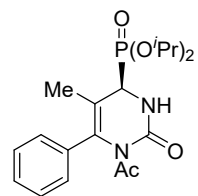

5m <sup>31</sup>P NMR (162 MHz, DMSO-d<sub>6</sub>)

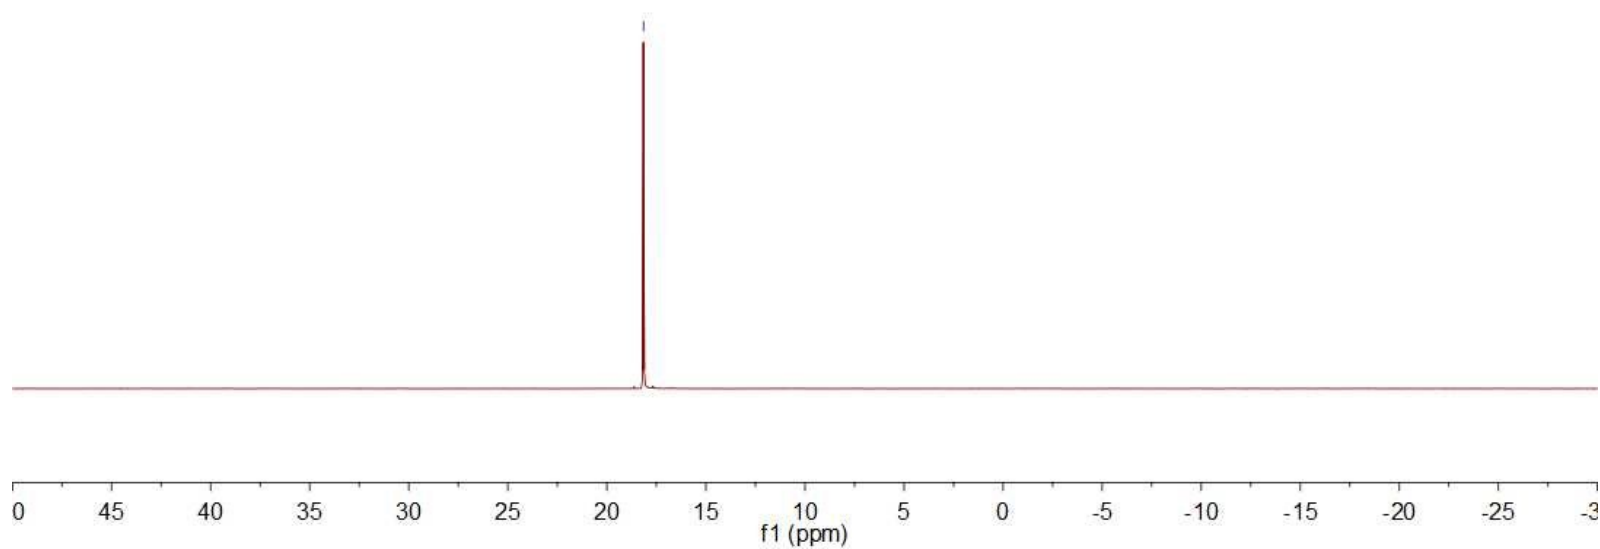

7.4024  
7.3849  
7.3660  
7.3329  
7.3149  
7.2963  
7.2836  
7.2644

5.2684  
5.0091  
4.9893  
4.8186  
4.8029  
4.7881  
4.7837  
4.7712  
4.7536  
4.7378  
4.7222  
4.0580  
4.0510  
4.0225  
4.0155

2.4240  
2.4158

1.3774  
1.3664  
1.3611  
1.3508  
1.3446  
1.3351  
0.9010  
0.8838

<sup>1</sup>H NMR FM-6-10 in CDCl<sub>3</sub>

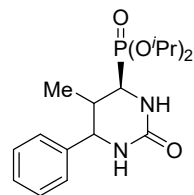

6m <sup>1</sup>H NMR (400 MHz, CDCl<sub>3</sub>)

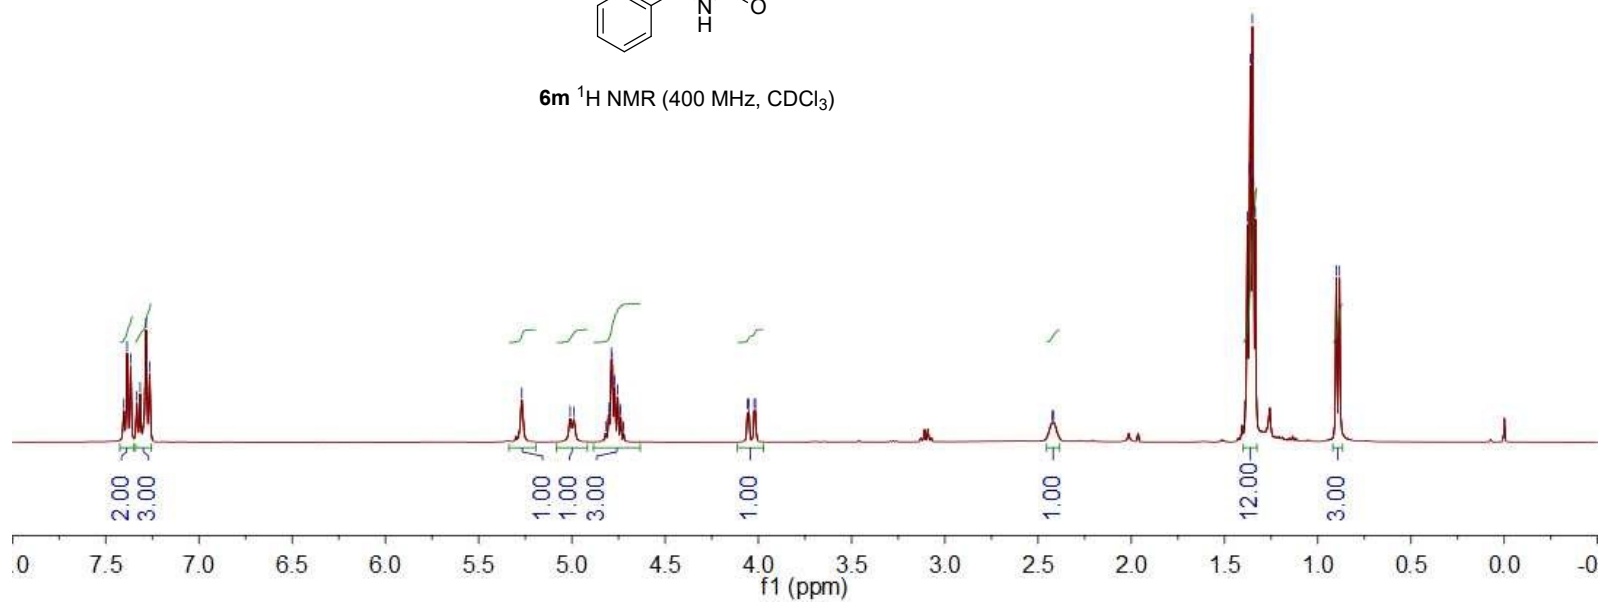

156.36  
156.24

138.87  
138.84

128.69  
128.03  
126.28

77.38  
77.06  
76.74  
71.95  
71.89  
71.63  
71.56  
60.34  
60.15  
54.42  
52.84

32.92  
32.87  
24.07  
24.02  
23.98  
23.95  
23.90  
7.62  
7.60

$^{13}\text{C}$  NMR FM-6-10 in  $\text{CDCl}_3$

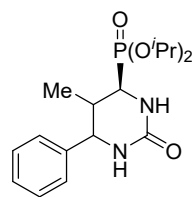

**6m**  $^{13}\text{C}$  NMR (100 MHz,  $\text{CDCl}_3$ )

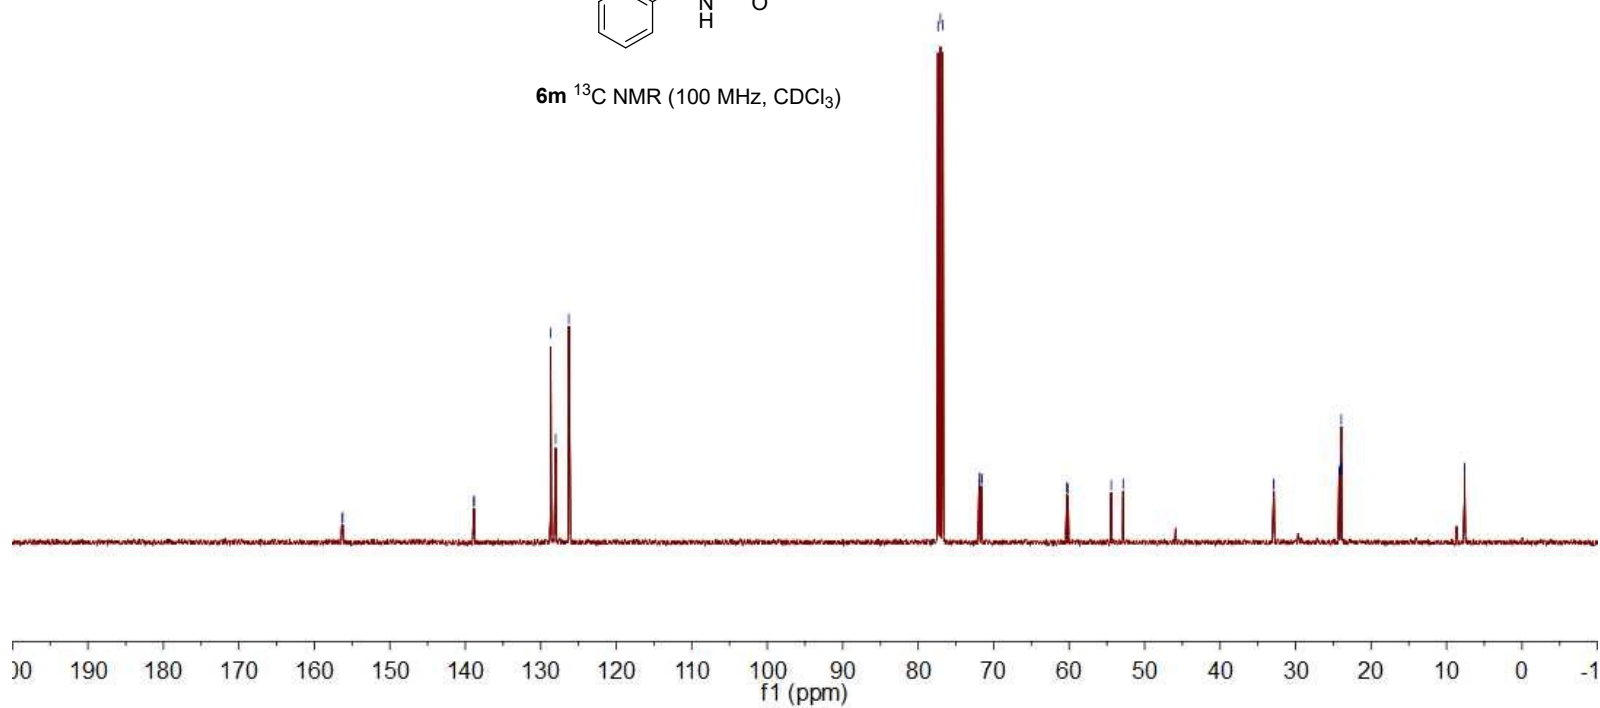

31P NMR FM-6-10 in CDCl3

—18.52

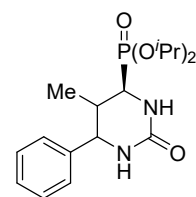

**6m** <sup>31</sup>P NMR (162 MHz, CDCl<sub>3</sub>)

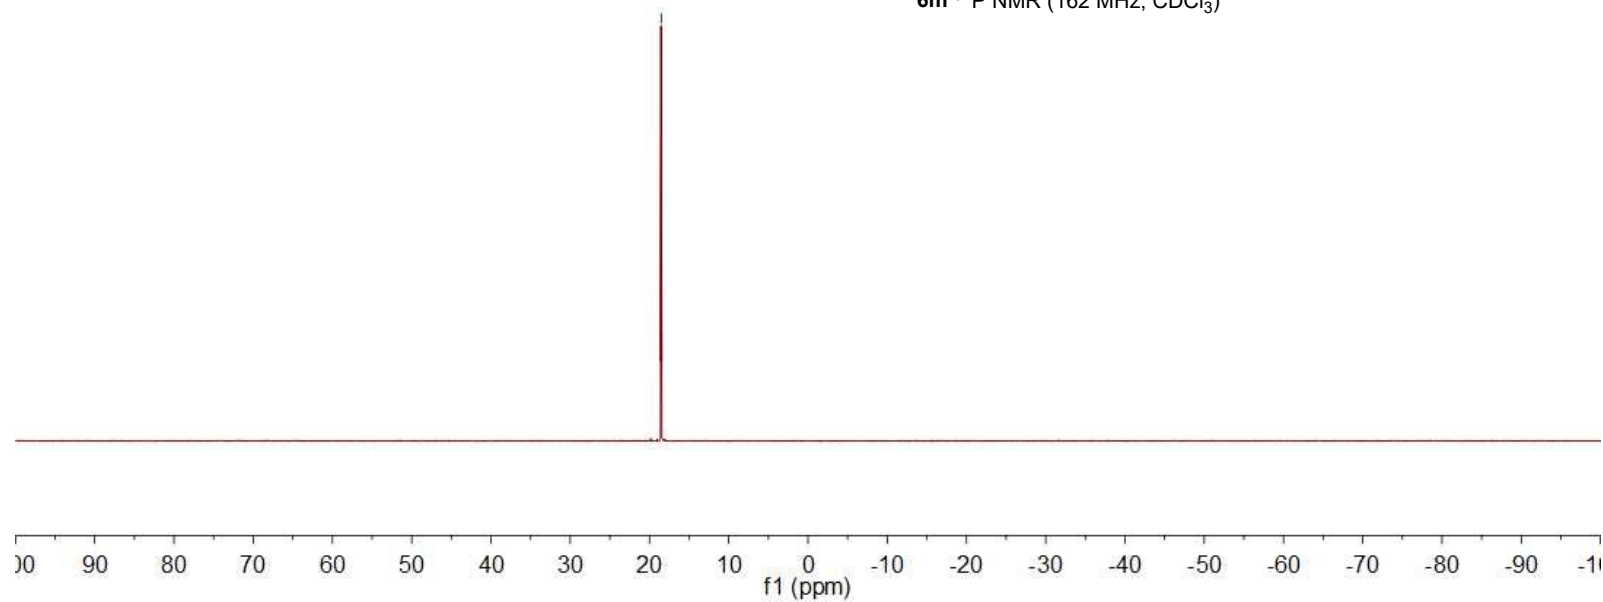

**Data file:** FM-5-34-1(+)-V-2020-10-28 17-31-31+08-00.dx  
**Sequence Name:** SingleSample **Project Name:** 1260  
**Sample name:** FM-5-34-1(+/-) **Operator:** SYSTEM  
**Instrument:** Ic1260 **Injection date:** 2020-10-28 17:35:45+08:00  
**Acq. method:** FM-4-41.amx **Type:** Sample  
**Processing method:** GC\_LC Area Percent\_DefaultMethod.pmx  
**Sample Info:** AD, Hexane/i-PrOH = 80/20, 1.0 mL/min, 30 °C, 254 nm

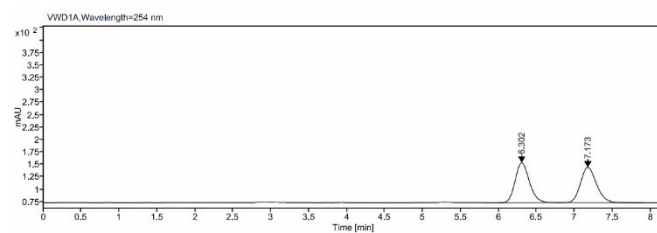

Signal: VWD1A,Wavelength=254 nm

| RT [min] | Peak Width Base | Area    | Height | Area% |
|----------|-----------------|---------|--------|-------|
| 6.302    | 0.799           | 1045.78 | 80.34  | 50.15 |
| 7.173    | 1.117           | 1039.68 | 70.97  | 49.85 |
| Sum      |                 | 2085.47 |        |       |

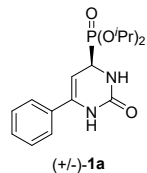

**Data file:** FM-5-34-1-V-2020-10-27 15-23-03+08-00.dx  
**Sequence Name:** SingleSample **Project Name:** 1260  
**Sample name:** FM-5-34-1 **Operator:** SYSTEM  
**Instrument:** Ic1260 **Injection date:** 2020-10-27 15:24:09+08:00  
**Acq. method:** FM-4-41.amx **Type:** Sample  
**Processing method:** GC\_LC Area Percent\_DefaultMethod.pmx  
**Sample Info:** AD, Hexane/i-PrOH = 80/20, 1.0 mL/min, 30 °C, 254 nm

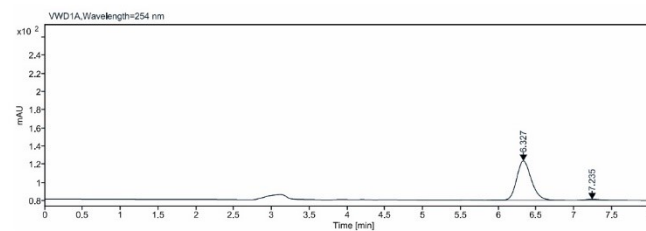

Signal: VWD1A,Wavelength=254 nm

| RT [min] | Peak Width Base | Area   | Height | Area% |
|----------|-----------------|--------|--------|-------|
| 6.327    | 1.143           | 579.55 | 43.22  | 98.18 |
| 7.235    | 0.200           | 10.76  | 0.87   | 1.82  |
| Sum      |                 | 590.31 |        |       |

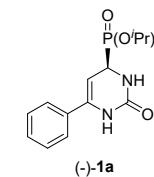

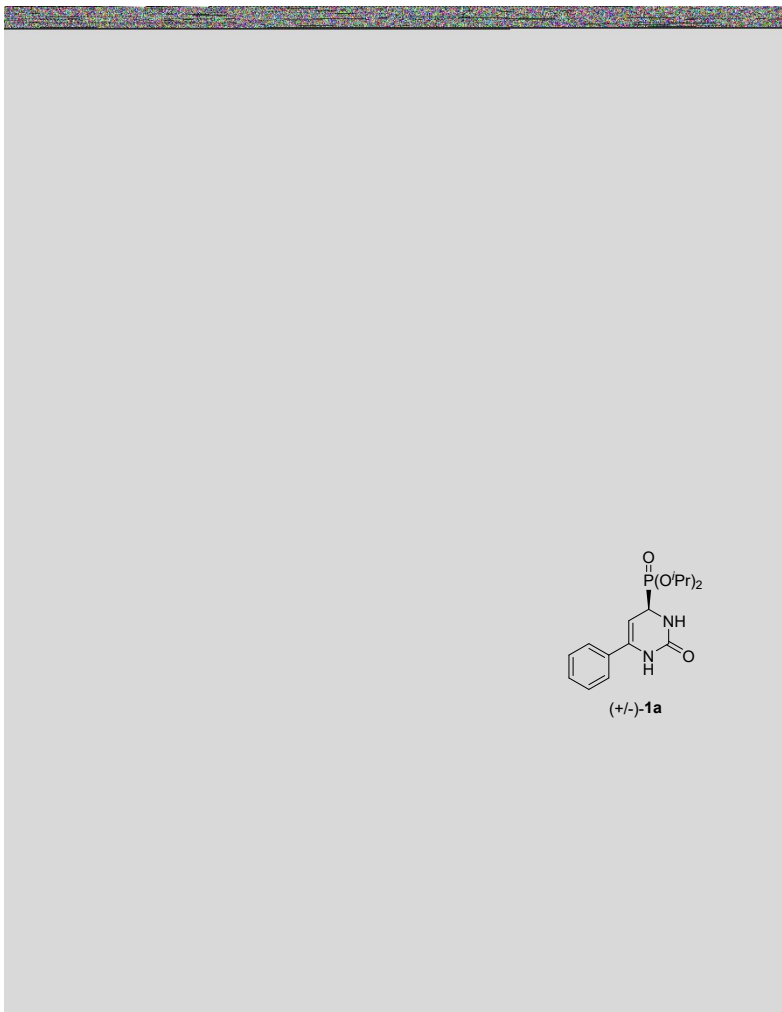

Data file: FM-6-15-V-2021-04-24 09-30-51+08-00.dlx  
Sequence Name: SingleSample Project Name: 1260  
Sample name: FM-6-15 Operator: SYSTEM  
Instrument: Ic1260 Injection date: 2021-04-24 09:31:57+08:00  
Acq. method: FM-4-41.amx Type: Sample  
Processing method: GC\_LC Area Percent\_DefaultMethod.pmx  
Sample Info: AD, Hexane/i-PrOH = 80/20, 1.0 mL/min, 30 oC, 254 nm

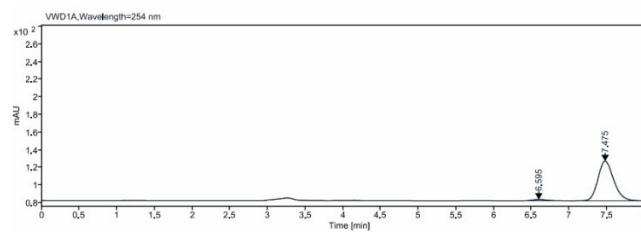

Signal: VWD1A,Wavelength=254 nm

| RT [min] | Peak Width Base | Area   | Height | Area% |
|----------|-----------------|--------|--------|-------|
| 6.595    | 0.176           | 14.14  | 1.29   | 2.10  |
| 7.475    | 1.523           | 658.18 | 45.03  | 97.90 |
| Sum      |                 | 672.31 |        |       |

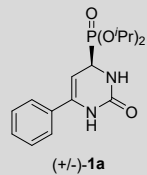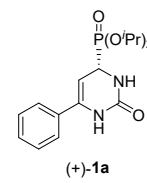



**Data file:** FM-5-34-2(+)-V-2020-10-28 16-18-09+08-00.dx  
**Sequence Name:** SingleSample **Project Name:** 1260  
**Sample name:** FM-5-34-2(+/-) **Operator:** SYSTEM  
**Instrument:** Ic1260 **Injection date:** 2020-10-28 16:19:47+08:00  
**Acq. method:** FM-4-41.amx **Type:** Sample  
**Processing method:** GC\_LC Area Percent\_DefaultMethod.pmx  
**Sample Info:** AD, Hexane/i-PrOH = 80/20, 1.0 mL/min, 30 oC, 254 nm

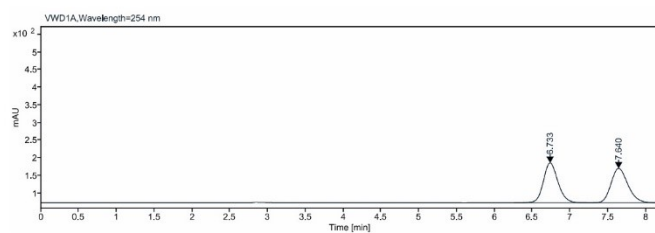

Signal: VWD1A,Wavelength=254 nm

| RT [min] | Peak Width Base | Area    | Height | Area% |
|----------|-----------------|---------|--------|-------|
| 6.733    | 1,004           | 1516,86 | 113,11 | 49,99 |
| 7,640    | 1,260           | 1517,43 | 97,54  | 50,01 |
| Sum      |                 | 3034,28 |        |       |

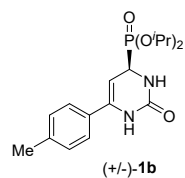

**Data file:** FM-5-34-2-V-2020-10-28 16-05-23+08-00.dx  
**Sequence Name:** SingleSample **Project Name:** 1260  
**Sample name:** FM-5-34-2 **Operator:** SYSTEM  
**Instrument:** Ic1260 **Injection date:** 2020-10-28 16:05:42+08:00  
**Acq. method:** FM-4-41.amx **Type:** Sample  
**Processing method:** GC\_LC Area Percent\_DefaultMethod.pmx  
**Sample Info:** AD, Hexane/i-PrOH = 80/20, 1.0 mL/min, 30 oC, 254 nm

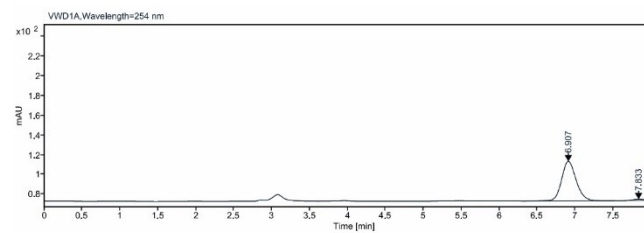

Signal: VWD1A,Wavelength=254 nm

| RT [min] | Peak Width Base | Area   | Height | Area% |
|----------|-----------------|--------|--------|-------|
| 6,907    | 1,193           | 538,35 | 40,21  | 97,14 |
| 7,833    | 0,204           | 15,83  | 1,24   | 2,86  |
| Sum      |                 | 554,18 |        |       |

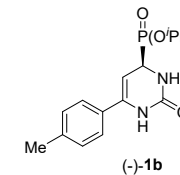

**Data file:** FM-5-34-3(+/-)-V-2020-10-28 17-01-24+08-00.dx  
**Sequence Name:** SingleSample **Project Name:** 1260  
**Sample name:** FM-5-34-3(+/-) **Operator:** SYSTEM  
**Instrument:** Ic1260 **Injection date:** 2020-10-28 17:01:36+08:00  
**Acq. method:** FM-4-41.amx **Type:** Sample  
**Processing method:** GC\_LC Area Percent\_DefaultMethod.pmx  
**Sample Info:** AD, Hexane/i-PrOH = 80/20, 1.0 mL/min, 30 oC, 254 nm

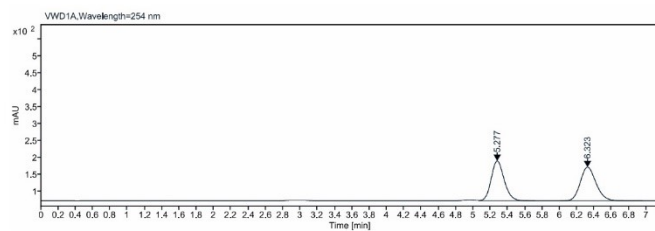

Signal: VWD1A,Wavelength=254 nm

| RT [min] | Peak Width Base | Area    | Height | Area% |
|----------|-----------------|---------|--------|-------|
| 5.277    | 0.656           | 1230,58 | 117,85 | 49,45 |
| 6.323    | 0,953           | 1257,85 | 99,45  | 50,55 |
|          | Sum             | 2488,43 |        |       |

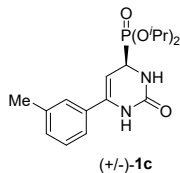

**Data file:** FM-5-34-3-V-2020-10-28 16-31-24+08-00.dx  
**Sequence Name:** SingleSample **Project Name:** 1260  
**Sample name:** FM-5-34-3 **Operator:** SYSTEM  
**Instrument:** Ic1260 **Injection date:** 2020-10-28 16:45:37+08:00  
**Acq. method:** FM-4-41.amx **Type:** Sample  
**Processing method:** GC\_LC Area Percent\_DefaultMethod.pmx  
**Sample Info:** AD, Hexane/i-PrOH = 80/20, 1.0 mL/min, 30 oC, 254 nm

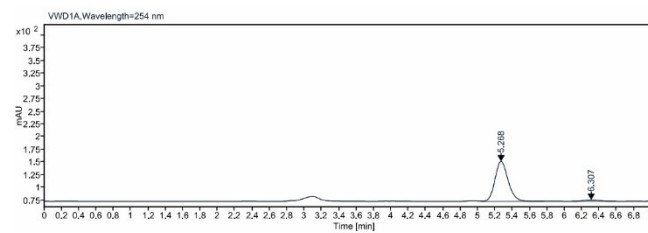

Signal: VWD1A,Wavelength=254 nm

| RT [min] | Peak Width Base | Area   | Height | Area% |
|----------|-----------------|--------|--------|-------|
| 5.268    | 0.160           | 823,65 | 78,76  | 96,03 |
| 6.307    | 0,199           | 34,07  | 2,68   | 3,97  |
|          | Sum             | 857,72 |        |       |

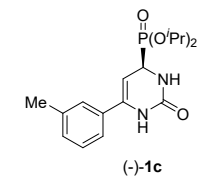

**Data file:** FM-5-34-10(+)-V-2020-10-31 10-05-18+08-00.dx  
**Sequence Name:** SingleSample **Project Name:** 1260  
**Sample name:** FM-5-34-10(+/-) **Operator:** SYSTEM  
**Instrument:** Ic1260 **Injection date:** 2020-10-31 10:06:47+08:00  
**Acq. method:** FM-4-41.amx **Type:** Sample  
**Processing method:** GC\_LC Area Percent\_DefaultMethod.pmx  
**Sample Info:** AD, Hexane/i-PrOH = 80/20, 1.0 mL/min, 30 °C, 254 nm

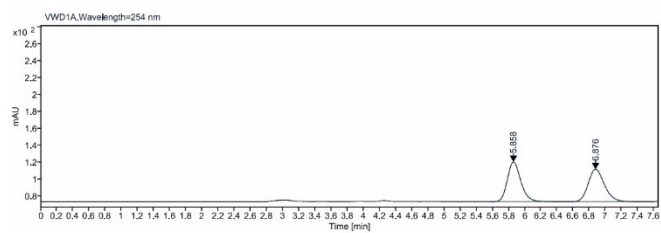

Signal: VWD1A,Wavelength=254 nm

| RT [min] | Peak Width Base | Area    | Height | Area% |
|----------|-----------------|---------|--------|-------|
| 5,858    | 0,973           | 546,78  | 47,18  | 50,32 |
| 6,876    | 1,050           | 539,80  | 38,46  | 49,68 |
| Sum      |                 | 1086,58 |        |       |

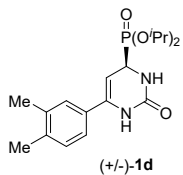

**Data file:** FM-5-34-10-V-2020-10-31 09-50-52+08-00.dx  
**Sequence Name:** SingleSample **Project Name:** 1260  
**Sample name:** FM-5-34-10 **Operator:** SYSTEM  
**Instrument:** Ic1260 **Injection date:** 2020-10-31 09:53:08+08:00  
**Acq. method:** FM-4-41.amx **Type:** Sample  
**Processing method:** GC\_LC Area Percent\_DefaultMethod.pmx  
**Sample Info:** AD, Hexane/i-PrOH = 80/20, 1.0 mL/min, 30 °C, 254 nm

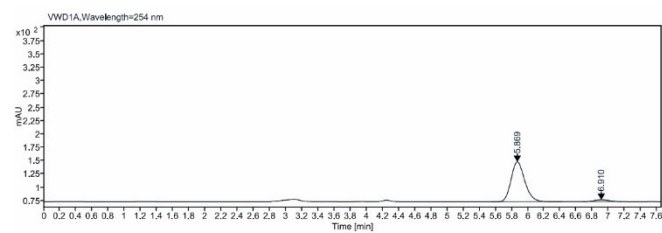

Signal: VWD1A,Wavelength=254 nm

| RT [min] | Peak Width Base | Area   | Height | Area% |
|----------|-----------------|--------|--------|-------|
| 5,869    | 0,874           | 886,25 | 74,86  | 95,19 |
| 6,910    | 0,205           | 44,79  | 3,40   | 4,81  |
| Sum      |                 | 931,04 |        |       |

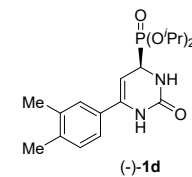

**Data file:** FM-5-34-11(+)-V-2020-10-31 11-07-10+08-00.dx  
**Sequence Name:** SingleSample **Project Name:** 1260  
**Sample name:** FM-5-34-11(+/-) **Operator:** SYSTEM  
**Instrument:** Ic1260 **Injection date:** 2020-10-31 11:07:20+08:00  
**Acq. method:** FM-4-41.amx **Type:** Sample  
**Processing method:** GC\_LC Area Percent\_DefaultMethod.pmx  
**Sample Info:** OD, Hexane/i-PrOH = 80/20, 1.0 mL/min, 30 oC, 254 nm

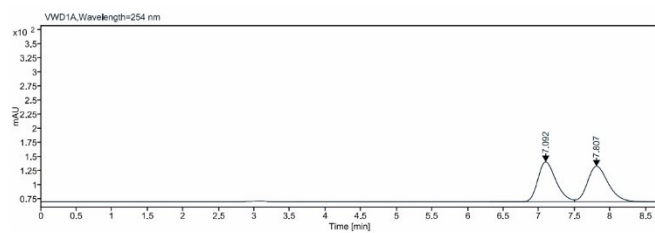

Signal: VWD1A,Wavelength=254 nm

| RT [min] | Peak Width Base | Area    | Height | Area% |
|----------|-----------------|---------|--------|-------|
| 7.092    | 1.196           | 1264.80 | 71.19  | 49.52 |
| 7.807    | 1.508           | 1289.42 | 63.40  | 50.48 |
| Sum      |                 | 2554.22 |        |       |

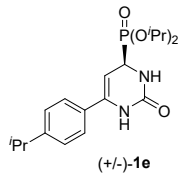

**Data file:** FM-5-34-11-V-2020-10-31 11-18-49+08-00.dx  
**Sequence Name:** SingleSample **Project Name:** 1260  
**Sample name:** FM-5-34-11 **Operator:** SYSTEM  
**Instrument:** Ic1260 **Injection date:** 2020-10-31 11:19:59+08:00  
**Acq. method:** FM-4-41.amx **Type:** Sample  
**Processing method:** GC\_LC Area Percent\_DefaultMethod.pmx  
**Sample Info:** OD, Hexane/i-PrOH = 80/20, 1.0 mL/min, 30 oC, 254 nm

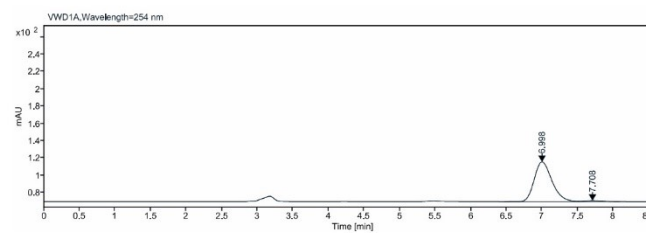

Signal: VWD1A,Wavelength=254 nm

| RT [min] | Peak Width Base | Area   | Height | Area% |
|----------|-----------------|--------|--------|-------|
| 6.998    | 1.044           | 804.31 | 46.18  | 97.04 |
| 7.708    | 0.289           | 24.54  | 1.28   | 2.96  |
| Sum      |                 | 828.85 |        |       |

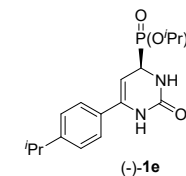

**Data file:** FM-5-34-12(+)-V-2020-11-01 20-42-35+08-00.dx  
**Sequence Name:** SingleSample **Project Name:** 1260  
**Sample name:** FM-5-34-12(+/-) **Operator:** SYSTEM  
**Instrument:** Ic1260 **Injection date:** 2020-11-01 20:46:07+08:00  
**Acq. method:** FM-4-41.amx **Type:** Sample  
**Processing method:** GC\_LC Area Percent\_DefaultMethod.pmx  
**Sample Info:** AD, Hexane/i-PrOH = 80/20, 1.0 mL/min, 30 °C, 254 nm

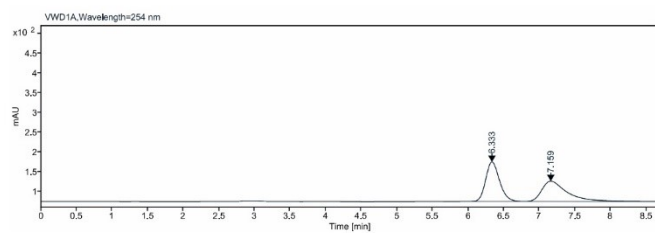

Signal: VWD1A,Wavelength=254 nm

| RT [min] | Peak Width Base | Area    | Height | Area% |
|----------|-----------------|---------|--------|-------|
| 6.333    | 1,134           | 1364,83 | 100,31 | 50,62 |
| 7,159    | 2,416           | 1331,25 | 51,68  | 49,38 |
| Sum      |                 | 2696,08 |        |       |

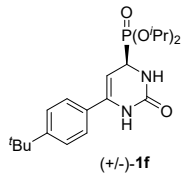

**Data file:** FM-5-34-12-V-2020-11-01 21-08-33+08-00.dx  
**Sequence Name:** SingleSample **Project Name:** 1260  
**Sample name:** FM-5-34-12 **Operator:** SYSTEM  
**Instrument:** Ic1260 **Injection date:** 2020-11-01 21:32:51+08:00  
**Acq. method:** FM-4-41.amx **Type:** Sample  
**Processing method:** GC\_LC Area Percent\_DefaultMethod.pmx  
**Sample Info:** AD, Hexane/i-PrOH = 80/20, 1.0 mL/min, 30 °C, 254 nm

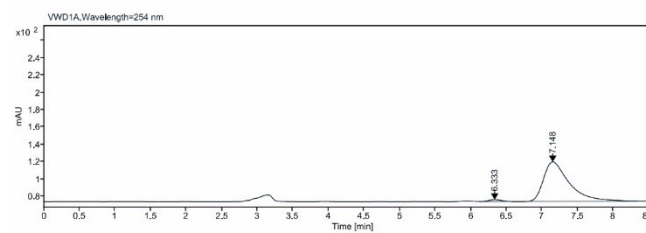

Signal: VWD1A,Wavelength=254 nm

| RT [min] | Peak Width Base | Area    | Height | Area% |
|----------|-----------------|---------|--------|-------|
| 6.333    | 0,210           | 30,03   | 2,22   | 2,51  |
| 7,148    | 0,376           | 1166,27 | 45,74  | 97,49 |
| Sum      |                 | 1196,30 |        |       |

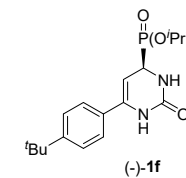

**Data file:** FM-5-34-6(+/-)-V-2020-10-30 10-02-22+08-00.dx  
**Sequence Name:** SingleSample **Project Name:** 1260  
**Sample name:** FM-5-34-6(+/-) **Operator:** SYSTEM  
**Instrument:** Ic1260 **Injection date:** 2020-10-30 10:03:49+08:00  
**Acq. method:** FM-4-41.amx **Type:** Sample  
**Processing method:** GC\_LC Area Percent\_DefaultMethod.pmx  
**Sample Info:** OD, Hexane/i-PrOH = 80/20, 1.0 mL/min, 30 oC, 254 nm

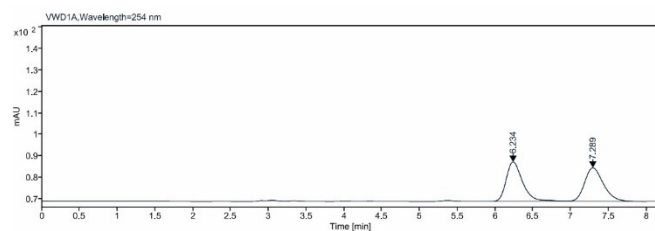

Signal: VWD1A,Wavelength=254 nm

| RT [min] | Peak Width Base | Area   | Height | Area% |
|----------|-----------------|--------|--------|-------|
| 6,234    | 1,027           | 273,60 | 18,35  | 50,57 |
| 7,289    | 1,000           | 267,38 | 15,58  | 49,43 |
| Sum      |                 | 540,98 |        |       |

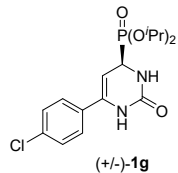

**Data file:** FM-5-34-6-V-2020-10-30 10-27-24+08-00.dx  
**Sequence Name:** SingleSample **Project Name:** 1260  
**Sample name:** FM-5-34-6 **Operator:** SYSTEM  
**Instrument:** Ic1260 **Injection date:** 2020-10-30 10:28:04+08:00  
**Acq. method:** FM-4-41.amx **Type:** Sample  
**Processing method:** GC\_LC Area Percent\_DefaultMethod.pmx  
**Sample Info:** OD, Hexane/i-PrOH = 80/20, 1.0 mL/min, 30 oC, 254 nm

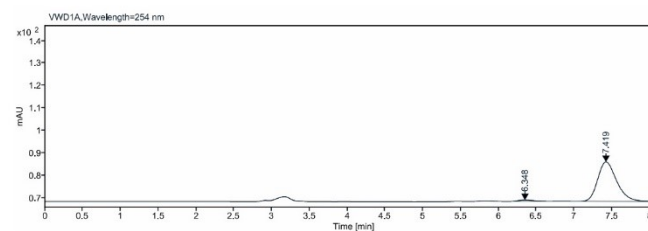

Signal: VWD1A,Wavelength=254 nm

| RT [min] | Peak Width Base | Area   | Height | Area% |
|----------|-----------------|--------|--------|-------|
| 6,348    | 0,203           | 7,74   | 0,59   | 2,45  |
| 7,419    | 1,410           | 308,38 | 17,55  | 97,55 |
| Sum      |                 | 316,12 |        |       |

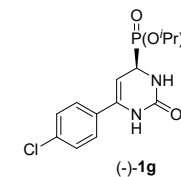

**Data file:** FM-5-34-7(+/-)-V-2020-10-30 11-08-55+08-00.dlx  
**Sequence Name:** SingleSample **Project Name:** 1260  
**Sample name:** FM-5-34-7(+/-) **Operator:** SYSTEM  
**Instrument:** Ic1260 **Injection date:** 2020-10-30 11:09:43+08:00  
**Acq. method:** FM-4-41.amx **Type:** Sample  
**Processing method:** GC\_LC Area Percent\_DefaultMethod.pmx  
**Sample Info:** AD, Hexane/i-PrOH = 80/20, 1.0 mL/min, 30 oC, 254 nm

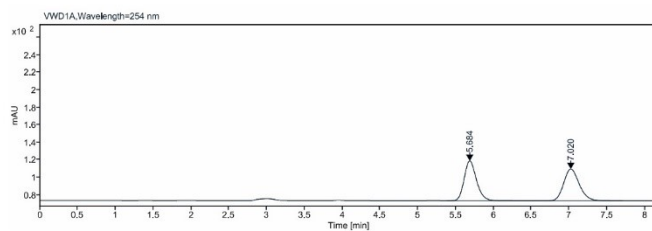

Signal: VWD1A,Wavelength=254 nm

| RT [min] | Peak Width Base | Area    | Height | Area% |
|----------|-----------------|---------|--------|-------|
| 5.684    | 1.273           | 519.72  | 45.55  | 50.04 |
| 7.020    | 1.043           | 518.98  | 36.28  | 49.96 |
| Sum      |                 | 1038.70 |        |       |

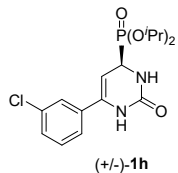

**Data file:** FM-5-34-7-V-2020-10-30 11-20-48+08-00.dlx  
**Sequence Name:** SingleSample **Project Name:** 1260  
**Sample name:** FM-5-34-7 **Operator:** SYSTEM  
**Instrument:** Ic1260 **Injection date:** 2020-10-30 11:21:09+08:00  
**Acq. method:** FM-4-41.amx **Type:** Sample  
**Processing method:** GC\_LC Area Percent\_DefaultMethod.pmx  
**Sample Info:** AD, Hexane/i-PrOH = 80/20, 1.0 mL/min, 30 oC, 254 nm

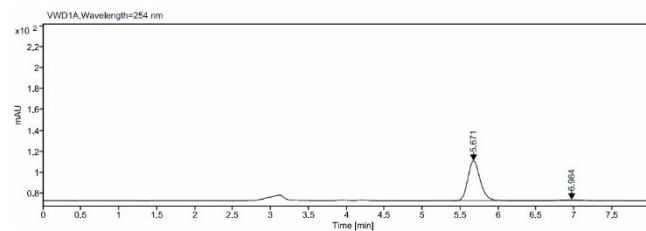

Signal: VWD1A,Wavelength=254 nm

| RT [min] | Peak Width Base | Area   | Height | Area% |
|----------|-----------------|--------|--------|-------|
| 5.671    | 1.220           | 430.29 | 38.07  | 96.54 |
| 6.964    | 0.259           | 15.43  | 0.93   | 3.46  |
| Sum      |                 | 445.72 |        |       |

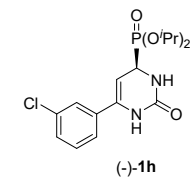

**Data file:** FM-5-34-9(+/-)-V-2020-10-30 18-52-33+08-00,dx  
**Sequence Name:** SingleSample **Project Name:** 1260  
**Sample name:** FM-5-34-9(+/-) **Operator:** SYSTEM  
**Instrument:** Ic1260 **Injection date:** 2020-10-30 18:54:39+08:00  
**Acq. method:** FM-4-41.amx **Type:** Sample  
**Processing method:** GC\_LC Area Percent\_DefaultMethod.pmx  
**Sample Info:** AD, Hexane/i-PrOH = 80/20, 1.0 mL/min, 30 oC, 254 nm

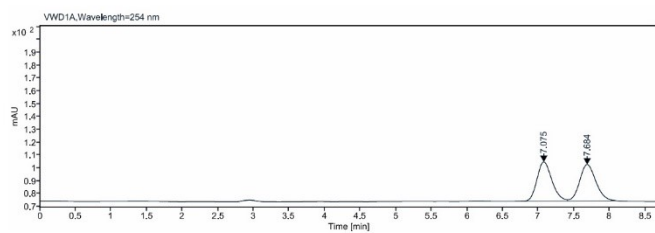

Signal: VWD1A,Wavelength=254 nm

| RT [min] | Peak Width Base | Area   | Height | Area% |
|----------|-----------------|--------|--------|-------|
| 7.075    | 0,224           | 444,15 | 30,55  | 49,95 |
| 7,684    | 0,244           | 445,12 | 28,29  | 50,05 |
| Sum      |                 | 889,27 |        |       |

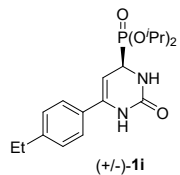

**Data file:** FM-5-34-9-V-2020-11-01 20-26-13+08-00,dx  
**Sequence Name:** SingleSample **Project Name:** 1260  
**Sample name:** FM-5-34-9 **Operator:** SYSTEM  
**Instrument:** Ic1260 **Injection date:** 2020-11-01 20:27:45+08:00  
**Acq. method:** FM-4-41.amx **Type:** Sample  
**Processing method:** GC\_LC Area Percent\_DefaultMethod.pmx  
**Sample Info:** AD, Hexane/i-PrOH = 80/20, 1.0 mL/min, 30 oC, 254 nm

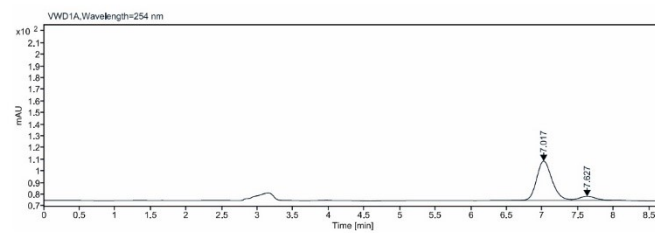

Signal: VWD1A,Wavelength=254 nm

| RT [min] | Peak Width Base | Area   | Height | Area% |
|----------|-----------------|--------|--------|-------|
| 7,017    | 0,844           | 503,17 | 33,70  | 90,38 |
| 7,627    | 0,560           | 53,57  | 3,45   | 9,62  |
| Sum      |                 | 556,74 |        |       |

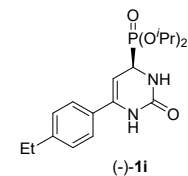



**Data file:** FM-5-34-8(+/-)-V-2020-10-30 19-43-05+08-00.dx  
**Sequence Name:** SingleSample **Project Name:** 1260  
**Sample name:** FM-5-34-8(+/-) **Operator:** SYSTEM  
**Instrument:** Ic1260 **Injection date:** 2020-10-30 19:43:19+08:00  
**Acq. method:** FM-4-41.amx **Type:** Sample  
**Processing method:** GC\_LC Area Percent\_DefaultMethod.pmx  
**Sample Info:** AD, Hexane/i-PrOH = 80/20, 1.0 mL/min, 30 oC, 254 nm

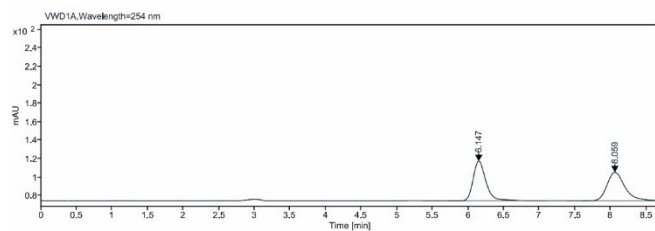

Signal: VWD1A,Wavelength=254 nm

| RT [min] | Peak Width Base | Area    | Height | Area% |
|----------|-----------------|---------|--------|-------|
| 6.147    | 1.385           | 538.38  | 43.11  | 49.78 |
| 8.059    | 1.800           | 543.24  | 30.90  | 50.22 |
| Sum      |                 | 1081.62 |        |       |

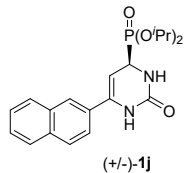

**Data file:** FM-5-34-8-V-2020-10-30 17-31-47+08-00.dx  
**Sequence Name:** SingleSample **Project Name:** 1260  
**Sample name:** FM-5-34-8 **Operator:** SYSTEM  
**Instrument:** Ic1260 **Injection date:** 2020-10-30 17:32:01+08:00  
**Acq. method:** FM-4-41.amx **Type:** Sample  
**Processing method:** GC\_LC Area Percent\_DefaultMethod.pmx  
**Sample Info:** AD, Hexane/i-PrOH = 80/20, 1.0 mL/min, 30 oC, 254 nm

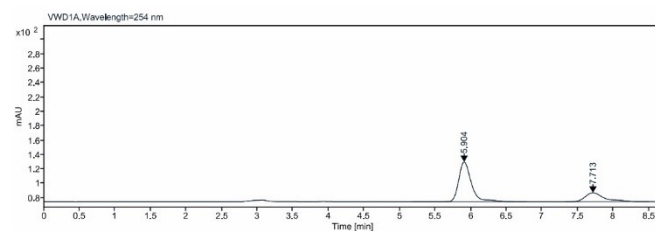

Signal: VWD1A,Wavelength=254 nm

| RT [min] | Peak Width Base | Area   | Height | Area% |
|----------|-----------------|--------|--------|-------|
| 5.904    | 1.596           | 689.70 | 55.55  | 74.45 |
| 7.713    | 1.172           | 236.67 | 12.55  | 25.55 |
| Sum      |                 | 926.37 |        |       |

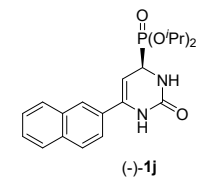

**Data file:** FM-5-34-16(+)-V-2020-11-03 10-11-19+08-00.dx  
**Sequence Name:** SingleSample **Project Name:** 1260  
**Sample name:** FM-5-34-16(+/-) **Operator:** SYSTEM  
**Instrument:** Ic1260 **Injection date:** 2020-11-03 10:13:52+08:00  
**Acq. method:** FM-4-41.amx **Type:** Sample  
**Processing method:** GC\_LC Area Percent\_DefaultMethod.pmx  
**Sample Info:** AD, Hexane/i-PrOH = 80/20, 1.0 mL/min, 30 °C, 254 nm

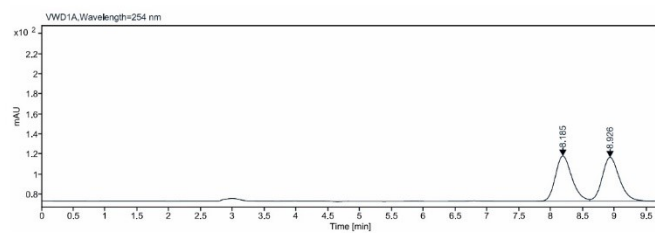

Signal: VWD1A, Wavelength=254 nm

| RT [min] | Peak Width Base | Area    | Height | Area% |
|----------|-----------------|---------|--------|-------|
| 8.185    | 0,839           | 807,43  | 45,02  | 49,75 |
| 8,926    | 1,017           | 815,62  | 43,59  | 50,25 |
| Sum      |                 | 1623,06 |        |       |

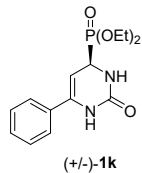

**Data file:** FM-5-34-16-V-2020-11-03 11-19-14+08-00.dx  
**Sequence Name:** SingleSample **Project Name:** 1260  
**Sample name:** FM-5-34-16 **Operator:** SYSTEM  
**Instrument:** Ic1260 **Injection date:** 2020-11-03 11:20:28+08:00  
**Acq. method:** FM-4-41.amx **Type:** Sample  
**Processing method:** GC\_LC Area Percent\_DefaultMethod.pmx  
**Sample Info:** AD, Hexane/i-PrOH = 80/20, 1.0 mL/min, 30 °C, 254 nm

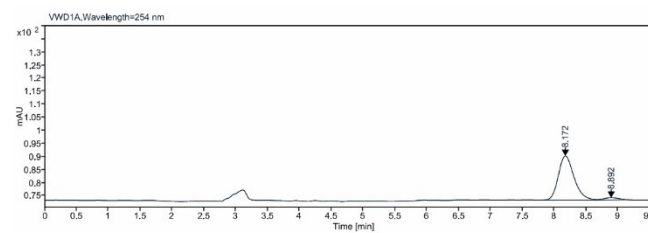

Signal: VWD1A, Wavelength=254 nm

| RT [min] | Peak Width Base | Area   | Height | Area% |
|----------|-----------------|--------|--------|-------|
| 8.172    | 0,881           | 290,13 | 16,91  | 95,04 |
| 8,892    | 0,261           | 15,13  | 0,88   | 4,96  |
| Sum      |                 | 305,26 |        |       |

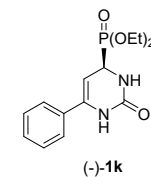

**Data file:** FM-5-34-17(+)-V-2020-11-04 10-27-28+08-00.dx  
**Sequence Name:** SingleSample **Project Name:** 1260  
**Sample name:** FM-5-34-17(+/-) **Operator:** SYSTEM  
**Instrument:** Ic1260 **Injection date:** 2020-11-04 10:28:14+08:00  
**Acq. method:** FM-4-41.amx **Type:** Sample  
**Processing method:** GC\_LC Area Percent\_DefaultMethod.pmx  
**Sample Info:** AD, Hexane/i-PrOH = 80/20, 1.0 mL/min, 30 oC, 254 nm

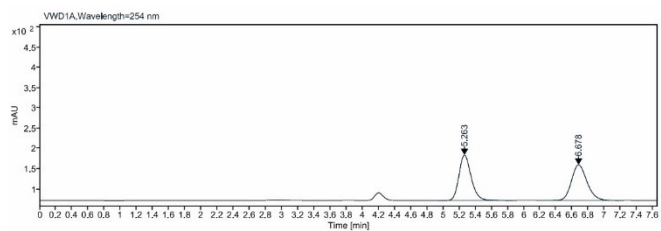

Signal: VWD1A,Wavelength=254 nm

| RT [min] | Peak Width Base | Area    | Height | Area% |
|----------|-----------------|---------|--------|-------|
| 5.263    | 0.913           | 1184.38 | 112.57 | 50.10 |
| 6.678    | 1.025           | 1179.44 | 88.14  | 49.90 |
| Sum      |                 | 2363.82 |        |       |

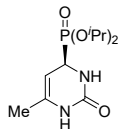

(+/-)-11

**Data file:** FM-5-34-17-V-2020-11-04 10-42-23+08-00.dx  
**Sequence Name:** SingleSample **Project Name:** 1260  
**Sample name:** FM-5-34-17 **Operator:** SYSTEM  
**Instrument:** Ic1260 **Injection date:** 2020-11-04 10:42:32+08:00  
**Acq. method:** FM-4-41.amx **Type:** Sample  
**Processing method:** GC\_LC Area Percent\_DefaultMethod.pmx  
**Sample Info:** AD, Hexane/i-PrOH = 80/20, 1.0 mL/min, 30 oC, 254 nm

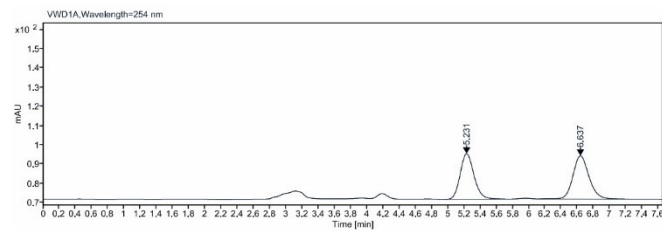

Signal: VWD1A,Wavelength=254 nm

| RT [min] | Peak Width Base | Area   | Height | Area% |
|----------|-----------------|--------|--------|-------|
| 5.231    | 0.795           | 281.72 | 23.70  | 47.65 |
| 6.637    | 1.123           | 309.52 | 22.46  | 52.35 |
| Sum      |                 | 591.24 |        |       |

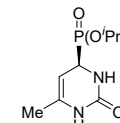

(-)-11

**Data file:** FM-5-34-14(+)-V-2020-11-02 17-01-18+08-00.dx  
**Sequence Name:** SingleSample **Project Name:** 1260  
**Sample name:** FM-5-34-14(+/-) **Operator:** SYSTEM  
**Instrument:** Ic1260 **Injection date:** 2020-11-02 17:01:29+08:00  
**Acq. method:** FM-4-41.amx **Type:** Sample  
**Processing method:** GC\_LC Area Percent\_DefaultMethod.pmx  
**Sample Info:** AD, Hexane/i-PrOH = 80/20, 1.0 mL/min, 30 oC, 254 nm

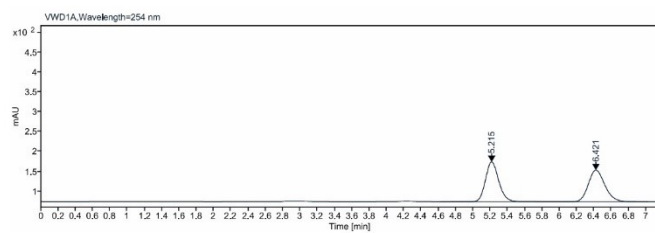

Signal: VWD1A,Wavelength=254 nm

| RT [min] | Peak Width Base | Area    | Height | Area% |
|----------|-----------------|---------|--------|-------|
| 5.215    | 1,483           | 1089,61 | 100,35 | 50,67 |
| 6.421    | 0,926           | 1060,73 | 79,57  | 49,33 |
| Sum      |                 | 2150,34 |        |       |

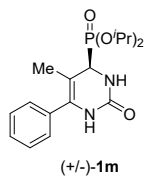

**Data file:** FM-5-34-14-V-2020-11-02 17-19-03+08-00.dx  
**Sequence Name:** SingleSample **Project Name:** 1260  
**Sample name:** FM-5-34-14 **Operator:** SYSTEM  
**Instrument:** Ic1260 **Injection date:** 2020-11-02 17:21:09+08:00  
**Acq. method:** FM-4-41.amx **Type:** Sample  
**Processing method:** GC\_LC Area Percent\_DefaultMethod.pmx  
**Sample Info:** AD, Hexane/i-PrOH = 80/20, 1.0 mL/min, 30 oC, 254 nm

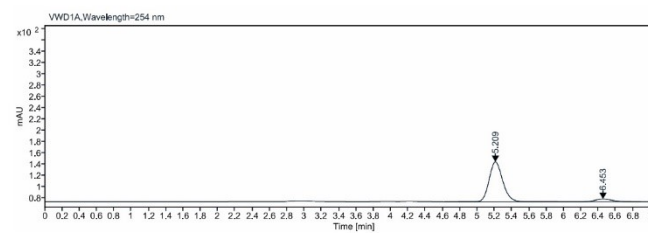

Signal: VWD1A,Wavelength=254 nm

| RT [min] | Peak Width Base | Area   | Height | Area% |
|----------|-----------------|--------|--------|-------|
| 5.209    | 1,502           | 784,30 | 70,70  | 91,91 |
| 6.453    | 0,767           | 69,02  | 5,15   | 8,09  |
| Sum      |                 | 853,33 |        |       |

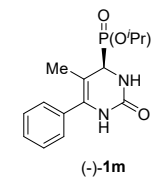

**Data file:** FM-5-34-15(+)-V-2020-11-03 09-39-02+08-00.dx  
**Sequence Name:** SingleSample **Project Name:** 1260  
**Sample name:** FM-5-34-15(+/-) **Operator:** SYSTEM  
**Instrument:** Ic1260 **Injection date:** 2020-11-03 09:45:25+08:00  
**Acq. method:** FM-4-41.amx **Type:** Sample  
**Processing method:** GC\_LC Area Percent\_DefaultMethod.pmx  
**Sample Info:** AD, Hexane/i-PrOH = 80/20, 1.0 mL/min, 30 oC, 254 nm

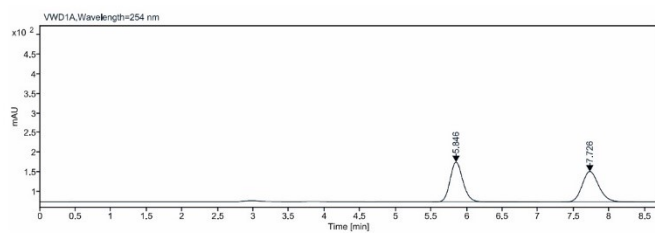

Signal: VWD1A,Wavelength=254 nm

| RT [min] | Peak Width Base | Area    | Height | Area% |
|----------|-----------------|---------|--------|-------|
| 5.846    | 1.513           | 1280,86 | 101,73 | 50,12 |
| 7.726    | 1,315           | 1274,52 | 78,00  | 49,88 |
| Sum      |                 | 2555,37 |        |       |

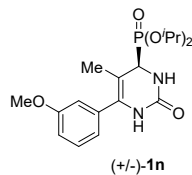

**Data file:** FM-5-34-15-V-2020-11-03 09-56-40+08-00.dx  
**Sequence Name:** SingleSample **Project Name:** 1260  
**Sample name:** FM-5-34-15 **Operator:** SYSTEM  
**Instrument:** Ic1260 **Injection date:** 2020-11-03 09:56:07+08:00  
**Acq. method:** FM-4-41.amx **Type:** Sample  
**Processing method:** GC\_LC Area Percent\_DefaultMethod.pmx  
**Sample Info:** AD, Hexane/i-PrOH = 80/20, 1.0 mL/min, 30 oC, 254 nm

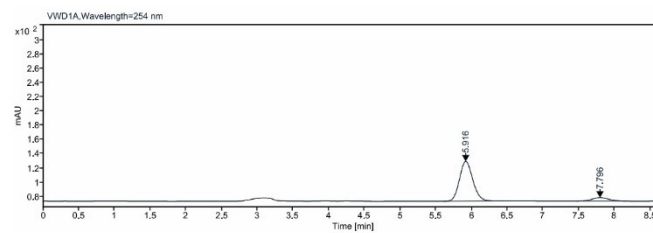

Signal: VWD1A,Wavelength=254 nm

| RT [min] | Peak Width Base | Area   | Height | Area% |
|----------|-----------------|--------|--------|-------|
| 5.916    | 0,848           | 723,74 | 55,87  | 90,08 |
| 7.796    | 0,252           | 79,69  | 4,89   | 9,92  |
| Sum      |                 | 803,43 |        |       |

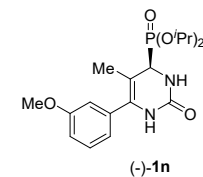

**Data file:** FM-5-34-13(+)-V-2020-11-02 15-58-37+08-00.dx  
**Sequence Name:** SingleSample **Project Name:** 1260  
**Sample name:** FM-5-34-13(+/-) **Operator:** SYSTEM  
**Instrument:** Ic1260 **Injection date:** 2020-11-02 15:58:47+08:00  
**Acq. method:** FM-4-41.amx **Type:** Sample  
**Processing method:** GC\_LC Area Percent\_DefaultMethod.pmx  
**Sample Info:** AD, Hexane/i-PrOH = 80/20, 1.0 mL/min, 30 °C, 254 nm

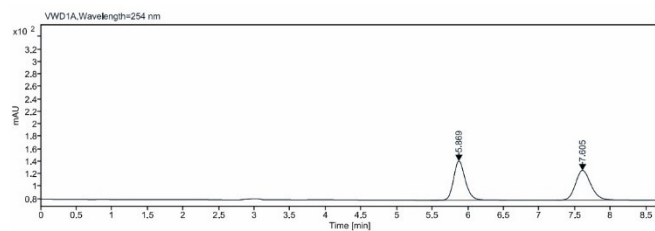

Signal: VWD1A,Wavelength=254 nm

| RT [min] | Peak Width Base | Area    | Height | Area% |
|----------|-----------------|---------|--------|-------|
| 5,869    | 1,062           | 714,51  | 62,72  | 50,02 |
| 7,605    | 1,315           | 714,03  | 47,62  | 49,98 |
| Sum      |                 | 1428,54 |        |       |

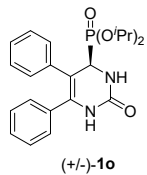

**Data file:** FM-5-34-13-V-2020-11-02 16-14-13+08-00.dx  
**Sequence Name:** SingleSample **Project Name:** 1260  
**Sample name:** FM-5-34-13 **Operator:** SYSTEM  
**Instrument:** Ic1260 **Injection date:** 2020-11-02 16:16:27+08:00  
**Acq. method:** FM-4-41.amx **Type:** Sample  
**Processing method:** GC\_LC Area Percent\_DefaultMethod.pmx  
**Sample Info:** AD, Hexane/i-PrOH = 80/20, 1.0 mL/min, 30 °C, 254 nm

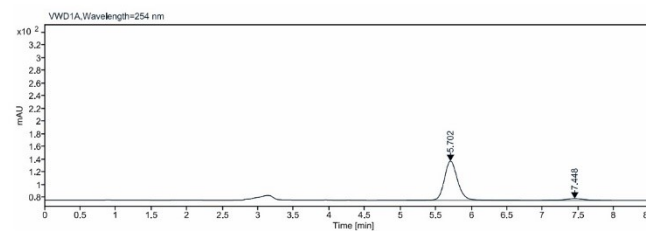

Signal: VWD1A,Wavelength=254 nm

| RT [min] | Peak Width Base | Area   | Height | Area% |
|----------|-----------------|--------|--------|-------|
| 5,702    | 1,813           | 789,50 | 61,78  | 93,89 |
| 7,448    | 0,272           | 51,40  | 2,81   | 6,11  |
| Sum      |                 | 840,89 |        |       |

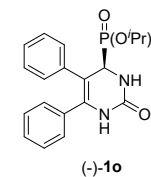

**Data file:** FM-5-56-V-2021-01-20 20-56-01+08-00.dx  
**Sequence Name:** SingleSample **Project Name:** 1260  
**Sample name:** FM-5-56 **Operator:** SYSTEM  
**Instrument:** Ic1260 **Injection date:** 2021-01-20 20:56:16+08:00  
**Acq. method:** FM-4-41.amx **Type:** Sample  
**Processing method:** GC\_LC Area Percent\_DefaultMethod.pmx  
**Sample Info:** AD, Hexane/i-PrOH = 80/20, 1.0 mL/min, 30 °C, 254 nm

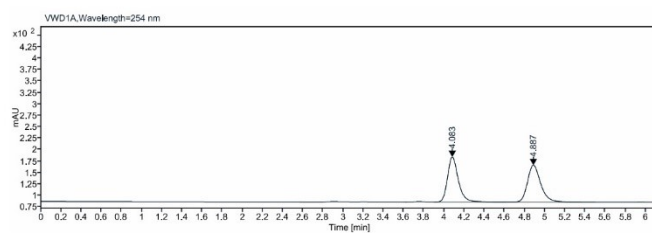

Signal: VWD1A,Wavelength=254 nm

| RT [min] | Peak Width Base | Area    | Height | Area% |
|----------|-----------------|---------|--------|-------|
| 4,083    | 0,654           | 730,62  | 98,50  | 49,80 |
| 4,887    | 0,939           | 736,47  | 80,84  | 50,20 |
| Sum      |                 | 1467,09 |        |       |

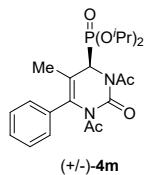

**Data file:** FM-5-57-V-2021-01-22 10-22-31+08-00.dx  
**Sequence Name:** SingleSample **Project Name:** 1260  
**Sample name:** FM-5-57 **Operator:** SYSTEM  
**Instrument:** Ic1260 **Injection date:** 2021-01-22 10:37:17+08:00  
**Acq. method:** FM-4-41.amx **Type:** Sample  
**Processing method:** GC\_LC Area Percent\_DefaultMethod.pmx  
**Sample Info:** AD, Hexane/i-PrOH = 80/20, 1.0 mL/min, 30 °C, 254 nm

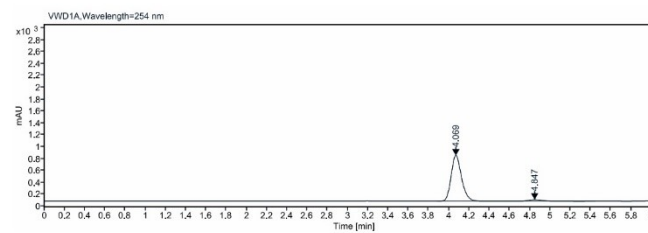

Signal: VWD1A,Wavelength=254 nm

| RT [min] | Peak Width Base | Area    | Height | Area% |
|----------|-----------------|---------|--------|-------|
| 4,069    | 0,108           | 5491,10 | 770,44 | 96,17 |
| 4,847    | 0,127           | 218,76  | 26,54  | 3,83  |
| Sum      |                 | 5709,86 |        |       |

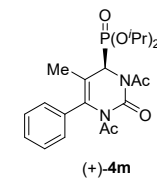

**Data file:** FM-5-65(+/-)-V-2021-02-02 10-35-10+08-00.dx  
**Sequence Name:** SingleSample **Project Name:** 1260  
**Sample name:** FM-5-65(+/-) **Operator:** SYSTEM  
**Instrument:** Ic1260 **Injection date:** 2021-02-02 10:40:26+08:00  
**Acq. method:** FM-5-65.amx **Type:** Sample  
**Processing method:** GC\_LC Area Percent\_DefaultMethod.pmx  
**Sample Info:** AD, Hexane/i-PrOH = 90/10, 1.0 mL/min, 30 °C, 254 nm

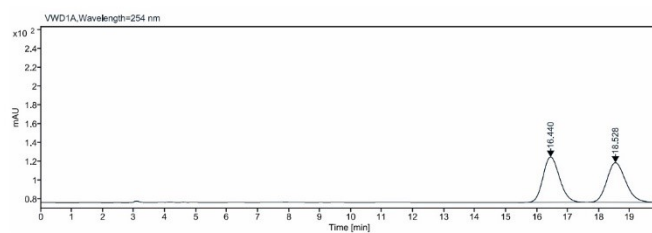

Signal: VWD1A,Wavelength=254 nm

| RT [min] | Peak Width Base | Area    | Height | Area% |
|----------|-----------------|---------|--------|-------|
| 16,440   | 2,225           | 1794,88 | 48,41  | 50,06 |
| 18,528   | 2,693           | 1790,30 | 42,31  | 49,94 |
| Sum      |                 | 3585,18 |        |       |

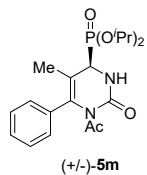

**Data file:** FM-5-66-V-2021-02-02 11-03-54+08-00.dx  
**Sequence Name:** SingleSample **Project Name:** 1260  
**Sample name:** FM-5-66 **Operator:** SYSTEM  
**Instrument:** Ic1260 **Injection date:** 2021-02-02 11:04:21+08:00  
**Acq. method:** FM-5-65.amx **Type:** Sample  
**Processing method:** GC\_LC Area Percent\_DefaultMethod.pmx  
**Sample Info:** AD, Hexane/i-PrOH = 90/10, 1.0 mL/min, 30 °C, 254 nm

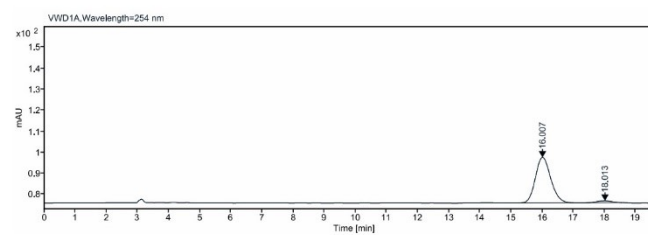

Signal: VWD1A,Wavelength=254 nm

| RT [min] | Peak Width Base | Area   | Height | Area% |
|----------|-----------------|--------|--------|-------|
| 16,007   | 0,528           | 740,92 | 21,63  | 95,91 |
| 18,013   | 0,470           | 31,58  | 0,88   | 4,09  |
| Sum      |                 | 772,50 |        |       |

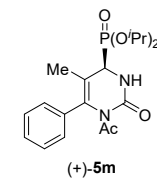



**Data file:** FM-6-11-V-2021-04-13 20-03-02+08-00.dx  
**Sequence Name:** SingleSample **Project Name:** 1260  
**Sample name:** FM-6-11 **Operator:** SYSTEM  
**Instrument:** Ic1260 **Injection date:** 2021-04-13 20:03:41+08:00  
**Acq. method:** FM-6-10.amx **Type:** Sample  
**Processing method:** GC\_LC Area Percent\_DefaultMethod.pmx  
**Sample Info:** AD, Hexane/i-PrOH = 80/20, 1.0 mL/min, 30 °C, 254 nm

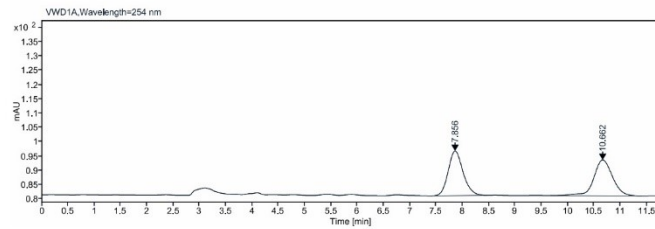

Signal: VWD1A, Wavelength=254 nm

| RT [min] | Peak Width Base | Area   | Height | Area% |
|----------|-----------------|--------|--------|-------|
| 7.856    | 1,069           | 306,59 | 15,60  | 49,75 |
| 10,662   | 1,737           | 309,68 | 12,53  | 50,25 |
| Sum      |                 | 616,27 |        |       |

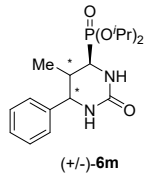

**Data file:** FM-6-11-V-2021-04-13 20-56-45+08-00.dx  
**Sequence Name:** SingleSample **Project Name:** 1260  
**Sample name:** FM-6-11 **Operator:** SYSTEM  
**Instrument:** Ic1260 **Injection date:** 2021-04-13 20:59:20+08:00  
**Acq. method:** FM-6-10.amx **Type:** Sample  
**Processing method:** GC\_LC Area Percent\_DefaultMethod.pmx  
**Sample Info:** AD, Hexane/i-PrOH = 80/20, 1.0 mL/min, 30 °C, 254 nm

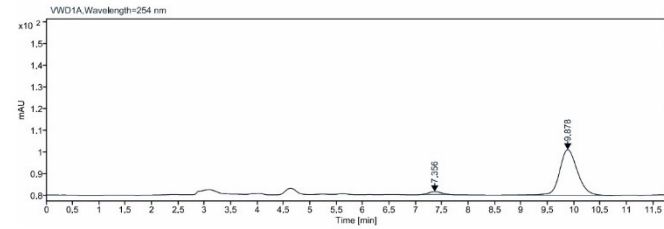

Signal: VWD1A, Wavelength=254 nm

| RT [min] | Peak Width Base | Area   | Height | Area% |
|----------|-----------------|--------|--------|-------|
| 7,356    | 0,250           | 20,15  | 1,28   | 3,96  |
| 9,878    | 1,793           | 488,73 | 21,00  | 96,04 |
| Sum      |                 | 508,88 |        |       |

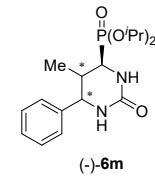

Supplement: d1ob02079j1.pdf [file d1ob02079j1.pdf]
